# Supplementary material for: CAMKV Is a Candidate Immunotherapeutic Target in MYCN Amplified Neuroblastoma
Source: Front Oncol. 2020 Mar 6;10:302. doi: 10.3389/fonc.2020.00302 (PMC7069022; doi:10.3389/fonc.2020.00302)
Supplement: Table S1 — Gene lists from microarray or RNAseq analysis for MYCN high tumors and transmembrane domain-containing gene products. [file Table_1.xlsx]

## Sheet: Intersected Genes
GENE	Mmusculus.JASPAR_CORE.Myc.MA0147.1	Mmusculus.JASPAR_CORE.Mycn.MA0104.2
CAMKV	1	1
CPNE7	1	1
GLRA2	1	1
HHIP	1	1
KCNH5	0	1
KIAA0922	1	1
LGR5	0	0
LRRC7	0	1
NME1	0	1
SLC16A1	1	1
SLC30A3	0	0
SLC44A5	0	0
SLCO5A1	1	1
TMEM97	1	1

## Sheet: MYCN Cor Microarray Analysis
V2	GENE	D_logFC	D_AveExpr	D_P.Value	D_adj.P.Val	V_logFC	V_AveExpr	V_P.Value	V_adj.P.Val	HIT_199	TM	Mmusculus.JASPAR_CORE.Myc.MA0147.1	Mmusculus.JASPAR_CORE.Mycn.MA0104.2
1138	CHRNA5	1.42591	6.81017	3.42e-09	1.11e-07	1.40819	7.01638	1.19e-05	0.00392085	TRUE	1	0	0
2742	GLRA2	1.51877	5.14226	0.000346287	0.00134871	1.83589	5.33844	0.00183104	0.045583	TRUE	1	1	1
3382	ICA1	1.6861	8.50312	2.88e-11	3.82e-09	1.34821	8.51859	0.00718185	0.0894663	TRUE	1	0	0
5471	PPAT	1.12834	7.52408	3.98e-09	1.24e-07	1.16145	7.57979	1.58e-05	0.00436857	TRUE	1	1	1
6566	SLC16A1	1.36744	8.59299	3.19e-09	1.06e-07	1.30335	8.42422	1.03e-05	0.0038527	TRUE	1	1	1
8549	LGR5	1.26172	5.62755	7.46e-05	0.000362967	1.13499	5.81188	0.0395242	0.198999	TRUE	1	0	0
8633	UNC5C	1.33041	8.07557	5.96e-06	4.28e-05	1.24685	8.18568	0.00297472	0.0585698	TRUE	1	1	1
10052	GJC1	1.47189	8.89553	9.92e-10	4.55e-08	1.36909	8.75068	0.00234161	0.0519207	TRUE	1	0	0
26154	ABCA12	1.93654	5.19562	1.3e-07	1.91e-06	2.51636	5.4814	1.23e-06	0.00106749	TRUE	1	1	1
27346	TMEM97	1.88903	8.63732	1.77e-14	3.49e-11	1.33186	8.53211	0.000186314	0.0157639	TRUE	1	1	1
51083	GAL	1.26732	8.88299	0.000627678	0.00225214	1.83025	8.96831	0.000271405	0.0190606	TRUE	1	1	1
53616	ADAM22	1.14349	8.21621	2.12e-06	1.83e-05	1.07092	8.23427	0.00563957	0.0803826	TRUE	1	0	0
55117	SLC6A15	1.16579	8.63222	0.000809253	0.00280398	1.12597	8.37618	0.0125133	0.115559	TRUE	1	1	1
55345	C4orf21	1.65374	6.6524	2.08e-11	3.13e-09	1.15163	6.70382	0.000250254	0.0185354	TRUE	1	0	0
56704	JPH1	1.65105	6.72564	7.26e-12	1.4e-09	1.1487	6.74592	0.000650988	0.0280747	TRUE	1	1	1
57633	LRRN1	1.85571	6.18388	9.7e-08	1.5e-06	2.17915	6.81287	8.49e-06	0.00384014	TRUE	1	1	1
64399	HHIP	1.37642	6.30035	1.7e-06	1.52e-05	1.50175	6.22206	0.000767948	0.0297924	TRUE	1	1	1
78997	GDAP1L1	1.1368	8.3884	1.36e-09	5.78e-08	1.39699	8.18041	2.54e-06	0.00180204	TRUE	1	1	0
81796	SLCO5A1	1.84496	7.29449	2.02e-16	8.96e-13	1.05408	7.67652	0.000415592	0.0232414	TRUE	1	1	1
81831	NETO2	1.64986	8.13153	3.93e-12	1.03e-09	1.65376	8.13557	8.76e-07	0.000916851	TRUE	1	1	1
90161	HS6ST2	1.31427	6.47724	3.57e-08	6.87e-07	1.9075	6.67366	4.93e-07	0.000698503	TRUE	1	1	1
114798	SLITRK1	1.00523	7.29307	0.000740084	0.00259059	1.25825	7.50365	0.00675282	0.0874085	TRUE	1	1	1
166647	GPR125	1.91026	8.01154	5.84e-13	3.5e-10	1.27124	8.05761	9.25e-05	0.0108815	TRUE	1	0	0
204962	SLC44A5	1.4213	6.91448	1.03e-06	1.01e-05	1.05118	7.32134	0.0121497	0.114217	TRUE	1	0	0
100133941	CD24	1.00348	9.12182	1.11e-05	7.18e-05	1.23013	9.221	0.000245686	0.0185354	TRUE	1	NA	NA
238	ALK	1.0143	8.2891	1.14e-05	7.37e-05	1.50267	8.05883	0.000556657	0.0265617	TRUE	0	1	1
332	BIRC5	1.88475	8.03027	3.54e-10	2.21e-08	1.35531	7.82718	0.0020882	0.0487843	TRUE	0	1	1
429	ASCL1	1.0007	7.28328	0.000793005	0.00275251	1.07246	6.98942	0.0133284	0.119304	TRUE	0	1	1
641	BLM	1.74754	6.53065	6.49e-11	6.67e-09	1.17167	6.63886	0.000884653	0.0319196	TRUE	0	1	1
675	BRCA2	1.47554	5.87382	8.71e-09	2.3e-07	1.01568	5.94376	0.00646109	0.0858002	TRUE	0	1	1
699	BUB1	1.69677	6.75737	1.31e-08	3.15e-07	1.18158	6.85355	0.00328759	0.0612305	TRUE	0	0	0
701	BUB1B	2.15611	6.87493	6.95e-11	7.02e-09	1.2825	6.974	0.00231895	0.0517628	TRUE	0	1	1
890	CCNA2	1.55169	7.81217	2.29e-10	1.61e-08	1.15484	7.74854	0.00456378	0.0724985	TRUE	0	1	1
891	CCNB1	1.87159	8.16297	3.63e-09	1.16e-07	1.39959	8.08204	0.00285161	0.0577736	TRUE	0	0	1
983	CDK1	2.19289	6.31038	9.63e-10	4.49e-08	1.47473	6.53502	0.00367292	0.0649101	TRUE	0	0	0
990	CDC6	1.75124	7.08485	2.89e-09	9.84e-08	1.26134	7.17802	0.00825829	0.0950961	TRUE	0	1	1
1063	CENPF	2.61911	7.65225	9.97e-11	8.9e-09	1.42691	7.68658	0.00648929	0.0860002	TRUE	0	1	1
1111	CHEK1	2.61455	7.52907	1.36e-14	3.02e-11	1.65266	7.75656	0.00034369	0.0204922	TRUE	0	0	0
1164	CKS2	1.4652	6.11359	3.99e-08	7.58e-07	1.11569	6.17214	0.000126025	0.0125436	TRUE	0	0	1
1463	NCAN	1.8314	7.66282	6.93e-13	3.73e-10	1.30145	7.6308	0.000909896	0.0324401	TRUE	0	1	1
1641	DCX	1.15533	8.66903	3.97e-05	0.000213673	1.2791	8.65494	0.00121202	0.0383688	TRUE	0	1	1
1653	DDX1	1.84793	10.2602	1.09e-07	1.66e-06	1.85995	10.296	0.000270485	0.0190606	TRUE	0	1	1
1719	DHFR	1.70353	7.9898	8.44e-10	4.14e-08	1.5265	7.9281	0.000236838	0.0182962	TRUE	0	0	0
1894	ECT2	1.48335	7.05103	4.88e-08	8.83e-07	1.1404	7.13731	0.00175009	0.0446252	TRUE	0	1	1
2138	EYA1	1.51937	7.22173	5.92e-05	0.000298663	1.10516	7.68433	0.0274646	0.167177	TRUE	0	0	0
2187	FANCB	1.6386	5.86438	4.69e-10	2.63e-08	1.13893	5.90078	0.00029187	0.0191967	TRUE	0	0	0
2259	FGF14	1.14913	8.18488	0.00230027	0.00694209	1.40561	8.42712	0.0130685	0.118274	TRUE	0	1	1
2305	FOXM1	1.66177	7.99314	9.33e-09	2.44e-07	1.08779	7.91058	0.00783323	0.0928116	TRUE	0	1	1
2491	CENPI	1.34292	6.37673	4.65e-07	5.29e-06	1.03917	6.41976	0.00567483	0.0806643	TRUE	0	1	1
3009	HIST1H1B	2.0424	7.47678	2.58e-11	3.64e-09	1.46121	7.63834	0.0023391	0.0519207	TRUE	0	1	1
3012	HIST1H2AE	1.48594	8.98949	1.01e-10	8.99e-09	1.5771	8.99359	0.000179009	0.0153343	TRUE	0	NA	NA
3018	HIST1H2BB	1.43356	5.56691	2.33e-06	1.97e-05	1.01021	5.88518	0.0124802	0.115471	TRUE	0	1	1
3066	HDAC2	1.10288	8.48212	2.87e-12	8.27e-10	1.04401	8.56255	0.000115207	0.0123924	TRUE	0	0	1
3148	HMGB2	1.57152	8.76671	1.33e-10	1.11e-08	1.0648	8.82823	0.00581497	0.0817018	TRUE	0	0	0
3149	HMGB3	1.36009	7.8239	1.97e-11	2.99e-09	1.01769	7.87068	0.000810981	0.0307041	TRUE	0	1	1
3236	HOXD10	1.6022	6.61295	7.31e-05	0.000356938	1.92215	6.77051	0.000526636	0.0260867	TRUE	0	1	1
3615	IMPDH2	1.1437	8.59886	7.21e-11	7.15e-09	1.32588	8.6932	0.000119264	0.0123924	TRUE	0	0	0
3832	KIF11	2.37851	6.63644	2.25e-11	3.27e-09	1.62468	6.77754	0.00112517	0.0369538	TRUE	0	0	0
4081	MAB21L1	1.40459	9.14009	0.000209824	0.000873134	1.50187	9.06257	5.36e-05	0.00811397	TRUE	0	1	1
4085	MAD2L1	2.04386	6.92064	2.18e-11	3.2e-09	1.78601	7.04566	5.43e-05	0.00811397	TRUE	0	0	0
4171	MCM2	1.2548	8.17574	3.81e-11	4.63e-09	1.1543	8.08674	0.000489816	0.0251533	TRUE	0	1	1
4174	MCM5	1.13736	8.49103	5.04e-10	2.77e-08	1.01634	8.50557	0.0035282	0.0635792	TRUE	0	1	0
4175	MCM6	1.45907	8.20099	2.78e-11	3.8e-09	1.11146	8.24609	0.00179553	0.0450607	TRUE	0	0	0
4288	MKI67	2.39473	7.80205	3.67e-10	2.25e-08	1.26463	7.90028	0.0118224	0.112504	TRUE	0	1	1
4602	MYB	1.64034	6.21357	2.4e-11	3.44e-09	1.10875	6.43264	0.00133275	0.0401362	TRUE	0	1	1
4605	MYBL2	1.72065	8.30096	7.62e-10	3.84e-08	1.20128	8.12887	0.00159551	0.0428234	TRUE	0	1	1
4613	MYCN	4.8389	9.45118	2.86e-40	5.09e-36	4.54894	9.30337	5.95e-19	1.06e-14	TRUE	0	1	1
4830	NME1	1.11468	9.55438	3.08e-10	2e-08	1.03305	9.40303	1.49e-05	0.00434663	TRUE	0	0	1
4953	ODC1	1.19148	10.7452	2.94e-11	3.87e-09	1.4436	10.768	0.000274391	0.0191799	TRUE	0	1	1
5347	PLK1	1.35709	8.14412	8.99e-10	4.28e-08	1.05471	8.01374	0.00459484	0.072764	TRUE	0	1	1
5475	PPEF1	1.03764	5.21302	7.94e-05	0.000383434	1.54319	5.77464	7.5e-05	0.00994707	TRUE	0	0	1
5557	PRIM1	1.32586	8.46053	5.58e-11	6.05e-09	1.05635	8.47113	0.0015644	0.0426977	TRUE	0	1	1
5832	ALDH18A1	1.15895	9.1262	1.36e-12	5.89e-10	1.24289	9.15463	3.73e-06	0.00236592	TRUE	0	1	1
5888	RAD51	1.52535	6.131	1.22e-10	1.03e-08	1.11688	6.23258	0.000310206	0.0192488	TRUE	0	0	1
6142	RPL18A	1.03673	11.091	8.9e-11	8.33e-09	1.02765	11.0088	0.000259084	0.0187894	TRUE	0	1	1
6241	RRM2	1.88491	8.01072	5.5e-09	1.61e-07	1.3849	7.99257	0.00306699	0.0593955	TRUE	0	1	1
6457	SH3GL3	1.40183	6.01807	3.56e-09	1.14e-07	1.08947	5.9175	0.00161341	0.0431085	TRUE	0	1	1
6585	SLIT1	1.6987	7.61038	1.71e-11	2.66e-09	1.41593	7.77682	4.96e-05	0.00778588	TRUE	0	1	1
7153	TOP2A	2.85718	8.35426	4.33e-09	1.32e-07	1.40188	8.57179	0.0235439	0.156151	TRUE	0	0	0
7272	TTK	2.03585	6.3165	1.93e-09	7.24e-08	1.39555	6.35334	0.000836539	0.0313208	TRUE	0	0	0
7443	VRK1	1.43935	7.58958	2.34e-09	8.42e-08	1.1497	7.59171	0.00293641	0.0581247	TRUE	0	1	1
7516	XRCC2	1.98991	7.34875	3.07e-11	3.95e-09	1.41572	7.32955	0.00101857	0.0346456	TRUE	0	1	1
8318	CDC45	1.81409	7.5824	1.04e-10	9.17e-09	1.33941	7.52674	0.000297498	0.0192216	TRUE	0	1	1
8329	HIST1H2AI	1.22891	11.1044	2.82e-11	3.8e-09	1.09059	11.1098	0.00154649	0.0425683	TRUE	0	NA	NA
8330	HIST1H2AK	1.27906	9.76819	8.19e-11	7.91e-09	1.09507	9.81071	0.00263284	0.0555585	TRUE	0	NA	NA
8332	HIST1H2AL	1.94354	8.53635	1e-07	1.55e-06	1.44614	8.53296	0.0230009	0.153955	TRUE	0	NA	NA
8335	HIST1H2AB	1.94699	7.70094	1.36e-08	3.24e-07	2.12217	7.65499	0.000141388	0.0135064	TRUE	0	NA	NA
8338	HIST2H2AC	1.13434	10.638	1.77e-08	4.04e-07	1.20647	10.5055	0.00356744	0.0640151	TRUE	0	0	0
8339	HIST1H2BG	1.01392	6.87543	3.69e-05	0.000200532	1.14933	7.11199	0.000130199	0.0127108	TRUE	0	NA	NA
8342	HIST1H2BM	2.51874	9.60855	8.54e-12	1.56e-09	1.16791	9.46197	0.0161649	0.131571	TRUE	0	1	1
8343	HIST1H2BF	1.31781	10.1392	9.66e-10	4.49e-08	1.00264	10.1776	0.00275963	0.0567514	TRUE	0	NA	NA
8347	HIST1H2BC	1.51249	7.44663	2.03e-06	1.77e-05	1.05842	7.43088	0.0429815	0.207222	TRUE	0	NA	NA
8350	HIST1H3A	2.09132	8.24519	8.94e-10	4.27e-08	1.94626	8.28165	4.99e-05	0.00778588	TRUE	0	NA	NA
8351	HIST1H3D	1.18394	7.67628	3.63e-06	2.84e-05	1.16	7.56048	0.000308134	0.0192488	TRUE	0	NA	NA
8352	HIST1H3C	2.74505	9.73864	1.37e-08	3.26e-07	1.33834	9.45229	0.0603974	0.248371	TRUE	0	NA	NA
8354	HIST1H3I	2.85248	9.79271	4.98e-13	3.16e-10	1.41038	9.94263	0.00581644	0.0817018	TRUE	0	NA	NA
8355	HIST1H3G	1.72035	7.38315	1.42e-09	5.99e-08	1.14536	7.56447	0.0298276	0.173991	TRUE	0	NA	NA
8356	HIST1H3J	1.56248	7.35058	1.49e-07	2.12e-06	1.46781	7.43611	0.00164696	0.0433475	TRUE	0	NA	NA
8357	HIST1H3H	1.02376	7.36662	2.07e-06	1.8e-05	1.0709	7.26087	0.00618179	0.0839387	TRUE	0	NA	NA
8360	HIST1H4D	1.38523	8.70983	0.000158488	0.000686497	1.44471	8.85171	9.88e-06	0.00384014	TRUE	0	NA	NA
8364	HIST1H4C	1.72933	10.4189	6.67e-07	7.1e-06	1.5409	10.6473	0.00040119	0.0227743	TRUE	0	NA	NA
8366	HIST1H4B	1.32545	10.0117	4.39e-06	3.32e-05	1.34739	10.134	1.6e-05	0.00436857	TRUE	0	NA	NA
8368	HIST1H4L	1.30145	8.52942	1.36e-10	1.11e-08	1.12688	8.47974	0.00365945	0.064849	TRUE	0	NA	NA
8492	PRSS12	2.22529	8.06866	8.7e-09	2.3e-07	1.98876	8.23058	0.000948338	0.0329747	TRUE	0	0	0
8968	HIST1H3F	1.61537	8.69687	9.07e-08	1.42e-06	1.15206	8.80515	0.000401096	0.0227743	TRUE	0	NA	NA
9055	PRC1	1.6905	8.42265	2.17e-09	7.93e-08	1.11144	8.46671	0.00816328	0.0947826	TRUE	0	1	1
9133	CCNB2	2.13159	7.3761	7.35e-10	3.76e-08	1.27996	7.39651	0.00305969	0.0593499	TRUE	0	0	0
9156	EXO1	2.6738	7.90388	4.84e-12	1.06e-09	1.70404	7.81287	0.000727373	0.0297268	TRUE	0	0	0
9232	PTTG1	1.2559	7.90553	5.34e-07	5.93e-06	1.18656	7.89712	0.0018977	0.0465608	TRUE	0	1	1
9319	TRIP13	1.55727	6.96702	1.98e-10	1.46e-08	1.08971	7.09976	0.00118314	0.0380145	TRUE	0	1	1
9745	ZNF536	1.74312	6.87137	2.24e-08	4.92e-07	2.01683	7.1238	4.98e-06	0.00295043	TRUE	0	1	1
9768	KIAA0101	2.2333	6.79814	2.68e-08	5.54e-07	1.71126	7.07308	0.00221793	0.0505233	TRUE	0	1	1
9787	DLGAP5	1.98661	6.4818	4.74e-09	1.42e-07	1.14249	6.60584	0.0163077	0.132067	TRUE	0	1	1
9824	ARHGAP11A	2.252	7.60979	7.26e-11	7.16e-09	1.38395	7.6035	0.00457212	0.0725334	TRUE	0	0	1
9833	MELK	1.97123	6.71787	1.1e-08	2.82e-07	1.22822	6.77469	0.00463953	0.0732488	TRUE	0	1	1
9837	GINS1	1.63467	7.23137	3.41e-09	1.11e-07	1.24866	7.27161	0.00172192	0.0443067	TRUE	0	1	1
9918	NCAPD2	1.15056	8.54993	1.83e-09	7.02e-08	1.10576	8.44845	0.00300259	0.0589503	TRUE	0	1	1
10112	KIF20A	1.99505	7.02931	3.55e-09	1.14e-07	1.5202	7.00113	0.000738513	0.0297268	TRUE	0	0	0
10144	FAM13A	1.63206	7.99988	5.52e-12	1.16e-09	1.30196	8.03843	0.000151762	0.0140443	TRUE	0	1	1
10403	NDC80	1.87692	5.96194	2.38e-09	8.56e-08	1.32478	6.08661	0.00148753	0.0419397	TRUE	0	0	1
10408	MYCNOS	2.17168	6.59059	2.5e-25	2.22e-21	2.64555	6.84262	9.19e-11	8.16e-07	TRUE	0	1	1
10535	RNASEH2A	1.08608	8.36438	5.48e-10	2.95e-08	1.0907	8.39965	0.000702446	0.0293876	TRUE	0	0	1
10606	PAICS	1.38782	8.72053	1.07e-10	9.37e-09	1.42059	8.69771	2.67e-05	0.00571783	TRUE	0	1	1
10642	IGF2BP1	1.78817	7.88488	2.76e-07	3.5e-06	1.39035	7.53107	0.00497453	0.0754399	TRUE	0	1	1
10733	PLK4	1.82828	6.12135	4.05e-11	4.8e-09	1.3393	6.19638	0.000472996	0.0245668	TRUE	0	1	1
10797	MTHFD2	1.39247	9.10818	7.11e-11	7.09e-09	1.52941	9.1828	6.56e-06	0.00342813	TRUE	0	1	1
11013	TMSB15A	2.34779	6.86428	1.39e-11	2.37e-09	2.09555	6.92505	0.000303444	0.0192488	TRUE	0	1	1
11169	WDHD1	1.44326	7.05791	4.22e-09	1.29e-07	1.1454	7.19398	0.000919456	0.0325436	TRUE	0	1	1
22836	RHOBTB3	1.01228	8.67322	5.1e-06	3.76e-05	1.35728	8.7395	7.6e-05	0.00999796	TRUE	0	0	0
22974	TPX2	2.11097	7.84528	2.59e-09	9.11e-08	1.46736	7.79321	0.00283533	0.0576496	TRUE	0	1	1
23397	NCAPH	1.60443	7.16069	8.86e-11	8.33e-09	1.05818	7.13652	0.00489933	0.0748507	TRUE	0	1	1
23594	ORC6	1.60663	6.64442	3.79e-12	1.01e-09	1.2393	6.70519	8.85e-05	0.0106189	TRUE	0	1	1
24137	KIF4A	1.66785	6.99395	1.12e-09	5.04e-08	1.1462	6.9795	0.00614356	0.0835825	TRUE	0	1	1
26227	PHGDH	1.57674	8.5385	2.42e-13	1.96e-10	1.91067	8.69223	5.9e-07	0.000698503	TRUE	0	0	0
26271	FBXO5	1.4715	6.66782	2.99e-11	3.88e-09	1.04217	6.77016	0.000588052	0.027259	TRUE	0	0	1
27132	CPNE7	1.37984	7.7422	6.73e-12	1.32e-09	1.09724	7.68632	0.000172657	0.0149647	TRUE	0	1	1
27330	RPS6KA6	1.16963	7.54172	2.84e-06	2.31e-05	1.13472	7.54391	0.000382184	0.0219762	TRUE	0	1	1
27338	UBE2S	1.07642	8.29183	1.55e-08	3.61e-07	1.2319	8.03321	0.000291618	0.0191967	TRUE	0	1	1
28969	BZW2	1.43803	7.65645	4.53e-11	5.2e-09	1.46635	7.83212	2e-06	0.00154376	TRUE	0	1	1
29089	UBE2T	1.38042	7.70946	1.23e-09	5.45e-08	1.21366	7.66685	0.00065283	0.0280859	TRUE	0	0	0
29968	PSAT1	1.20421	7.41998	1.12e-06	1.08e-05	1.25349	7.56915	0.000101151	0.0116704	TRUE	0	1	1
51053	GMNN	1.05004	6.86443	3.25e-09	1.07e-07	1.07045	6.80796	0.000117804	0.0123924	TRUE	0	0	0
51514	DTL	2.50123	7.90147	1.52e-09	6.31e-08	1.46414	7.84099	0.00768584	0.092527	TRUE	0	0	1
51594	NBAS	1.39365	8.70317	2.63e-05	0.000150167	2.21748	9.02301	0.000119997	0.0123924	TRUE	0	1	1
51659	GINS2	1.85035	7.34898	2.55e-10	1.74e-08	1.6557	7.39812	0.000311925	0.0192488	TRUE	0	1	1
54443	ANLN	1.74566	7.00922	1.65e-08	3.8e-07	1.02624	7.04989	0.0096942	0.102307	TRUE	0	1	1
54517	PUS7	1.33345	6.99294	1.06e-08	2.72e-07	1.10265	7.13224	1.28e-05	0.00392085	TRUE	0	0	0
55038	CDCA4	1.00729	8.26179	9.47e-11	8.67e-09	1.05705	8.27055	0.000551937	0.0265617	TRUE	0	1	1
55215	FANCI	1.96078	7.75515	9.71e-10	4.5e-08	1.07556	7.84739	0.0092744	0.0997753	TRUE	0	1	1
55247	NEIL3	2.00122	6.81112	3.71e-14	4.71e-11	1.4473	6.86693	0.000524859	0.0260867	TRUE	0	0	1
55388	MCM10	1.9501	7.05305	9.89e-11	8.9e-09	1.33302	7.14751	0.000937105	0.0328875	TRUE	0	0	0
55506	H2AFY2	1.43973	8.95285	2.88e-12	8.27e-10	1.34882	8.9572	0.000408338	0.0231062	TRUE	0	1	1
55536	CDCA7L	1.38881	6.73727	4.74e-06	3.54e-05	1.03833	7.22092	0.0197207	0.143664	TRUE	0	0	0
55771	PRR11	1.74744	7.15547	1.72e-08	3.94e-07	1.26831	7.042	0.00625985	0.0843893	TRUE	0	1	1
55789	DEPDC1B	1.9932	7.20317	2.44e-12	7.63e-10	1.44591	7.24522	7.88e-05	0.0101552	TRUE	0	1	1
55872	PBK	2.67508	6.76779	3.08e-10	2e-08	1.63371	6.9241	0.00287417	0.0577832	TRUE	0	1	1
55885	LMO3	1.39223	5.65888	2.97e-05	0.0001668	1.6536	5.6456	1.28e-05	0.00392085	TRUE	0	0	0
56154	TEX15	2.13017	5.93313	8.46e-14	8.35e-11	1.69549	5.97823	3.01e-05	0.00600427	TRUE	0	0	0
56992	KIF15	2.06563	6.10017	3.17e-12	8.81e-10	1.06145	6.29061	0.0122586	0.1148	TRUE	0	0	1
57405	SPC25	1.92514	5.80555	8.62e-10	4.2e-08	1.0173	5.9637	0.00441538	0.0720029	TRUE	0	0	0
57554	LRRC7	1.28606	6.21695	0.000469092	0.00175326	1.79876	6.74459	0.00158718	0.0428234	TRUE	0	0	1
57650	KIAA1524	1.72801	6.9152	4.96e-09	1.47e-07	1.04302	7.10237	0.0065286	0.0863097	TRUE	0	1	1
57820	CCNB1IP1	1.39251	7.56112	4.49e-12	1.05e-09	1.57735	7.79767	2.79e-10	1.65e-06	TRUE	0	1	1
58516	FAM60A	2.07964	8.46947	2.07e-12	7.06e-10	1.18252	8.74307	0.00702403	0.0889544	TRUE	0	0	0
64105	CENPK	2.04839	6.41509	1.63e-09	6.53e-08	1.11921	6.60093	0.0071582	0.0892692	TRUE	0	0	0
64151	NCAPG	2.55539	7.63169	1.15e-10	9.78e-09	1.58794	7.66388	0.00303805	0.0592245	TRUE	0	0	1
64946	CENPH	1.45888	5.39437	8.41e-09	2.25e-07	1.22422	5.55977	0.000665694	0.0283646	TRUE	0	0	0
79682	MLF1IP	1.92224	6.28213	2.64e-13	2.04e-10	1.1745	6.4237	0.00283903	0.0576496	TRUE	0	1	1
79698	ZMAT4	1.12067	7.31995	0.000255254	0.00103599	1.29359	7.28343	0.000425942	0.0235035	TRUE	0	0	0
79801	SHCBP1	1.01135	6.69294	1.44e-07	2.05e-06	1.06103	6.80228	0.000627845	0.0278301	TRUE	0	1	1
79915	ATAD5	1.89424	6.82146	1.53e-11	2.43e-09	1.05183	7.02444	0.00694242	0.0884885	TRUE	0	1	1
80312	TET1	1.56657	7.41088	2.06e-12	7.06e-10	1.55082	7.67684	1.28e-05	0.00392085	TRUE	0	0	0
81930	KIF18A	1.84458	5.9382	2.48e-08	5.23e-07	1.06546	5.97324	0.0102965	0.105061	TRUE	0	1	1
83879	CDCA7	1.94336	7.00119	7.13e-13	3.73e-10	1.34079	7.21184	0.000499724	0.0254415	TRUE	0	1	1
83990	BRIP1	2.81903	7.43314	2.02e-12	7.06e-10	1.60173	7.44274	0.0039094	0.0673084	TRUE	0	0	0
84057	MND1	1.78323	5.84799	4.93e-11	5.51e-09	1.54587	5.99746	4.46e-05	0.00726659	TRUE	0	0	1
90293	KLHL13	1.36938	9.56852	3.75e-06	2.91e-05	1.96352	9.75171	6.83e-05	0.00926797	TRUE	0	1	0
92815	HIST3H2A	1.3171	7.94899	2.5e-09	8.86e-08	1.3407	7.8218	0.000105826	0.01205	TRUE	0	1	1
134466	ZNF300P1	1.66875	7.15561	4.47e-11	5.16e-09	1.24658	7.39208	0.000121398	0.0123924	TRUE	0	NA	NA
147841	SPC24	1.32179	6.74738	2.18e-10	1.57e-08	1.19795	6.74462	0.000429349	0.0236182	TRUE	0	1	1
151648	SGOL1	1.76697	5.87949	2.36e-08	5.09e-07	1.09208	5.94541	0.0106519	0.10692	TRUE	0	0	1
157313	CDCA2	1.47896	6.25866	8.88e-10	4.25e-08	1.09431	6.34921	0.00195243	0.0472107	TRUE	0	1	1
165055	CCDC138	1.493	5.72605	4.84e-12	1.06e-09	1.01777	6.0302	0.000171218	0.014938	TRUE	0	1	1
201161	CENPV	1.34754	8.20464	8.11e-12	1.5e-09	1.20567	8.26747	0.000603274	0.02745	TRUE	0	1	1
219790	RTKN2	1.66853	6.57727	3.14e-11	3.98e-09	1.09866	6.69335	0.00269747	0.0563204	TRUE	0	0	0
221150	SKA3	2.0027	6.4004	1.3e-10	1.09e-08	1.4107	6.45583	0.00107605	0.0358038	TRUE	0	1	1
259266	ASPM	2.11815	6.66406	7.43e-10	3.79e-08	1.2178	6.72821	0.00586357	0.0820992	TRUE	0	0	0
317761	C14orf39	1.93534	4.61738	2.12e-08	4.69e-07	1.15386	4.67134	0.0013965	0.0411375	TRUE	0	1	1
317772	HIST2H2AB	1.34271	9.77742	2.26e-08	4.93e-07	1.36177	9.67547	0.00272564	0.0564442	TRUE	0	0	0
333932	HIST2H3A	1.71809	8.12942	1.02e-08	2.64e-07	1.09437	7.75212	0.0140113	0.121797	TRUE	0	0	1
389421	LIN28B	1.33793	6.65645	8.18e-07	8.37e-06	1.07054	6.46893	0.0025865	0.0552367	TRUE	0	0	0
414149	ACBD7	1.04558	4.95252	3.64e-06	2.84e-05	1.09457	5.14494	0.00881854	0.0976857	TRUE	0	0	1
NA	C12orf24	1.04168	6.84098	1.19e-08	2.95e-07	1.15306	6.91047	2.29e-05	0.00542551	TRUE	0	NA	NA
NA	C12orf48	1.51576	5.57103	4.1e-08	7.69e-07	1.03704	5.62035	0.00087307	0.0319196	TRUE	0	NA	NA
NA	C15orf42	1.59981	6.98807	1.54e-11	2.43e-09	1.00919	6.93734	0.00206546	0.0484796	TRUE	0	NA	NA
NA	C21orf45	1.0974	8.31108	3.16e-11	3.98e-09	1.03319	8.41301	4.17e-05	0.00703531	TRUE	0	NA	NA
NA	NBLA00301	1.41536	10.1615	9e-06	6.06e-05	1.34333	9.87746	0.0107252	0.107166	TRUE	0	NA	NA
NA	LOC84856	1.64677	7.67126	2.47e-19	1.46e-15	1.58905	7.88738	3.82e-07	0.000634757	TRUE	0	NA	NA
NA	KIAA1409	1.17272	8.31803	4.11e-07	4.77e-06	1.04309	8.18953	0.000624444	0.0278301	TRUE	0	NA	NA
93	ACVR2B	1.07809	8.56016	1.58e-09	6.45e-08	0.84314	8.43984	0.0161121	0.131502	FALSE	1	1	1
1033	CDKN3	1.20178	6.14816	3.25e-08	6.36e-07	0.725603	6.23014	0.0107918	0.107447	FALSE	1	1	1
2066	ERBB4	1.69682	5.85074	2.04e-06	1.77e-05	0.890153	6.08499	0.15618	0.402059	FALSE	1	0	0
2175	FANCA	1.41052	7.41848	2.32e-10	1.63e-08	0.810159	7.40455	0.0037121	0.0654332	FALSE	1	1	1
2891	GRIA2	1.20709	8.61144	0.000408097	0.00155453	0.943673	8.42889	0.0381485	0.19631	FALSE	1	1	1
2893	GRIA4	1.14979	7.24546	3.78e-06	2.93e-05	0.672936	7.3125	0.0554305	0.237666	FALSE	1	0	0
3161	HMMR	1.00788	5.03205	4.27e-06	3.24e-05	0.893134	5.1133	0.0104797	0.105643	FALSE	1	1	1
7112	TMPO	1.33323	8.4944	1.75e-11	2.7e-09	0.703549	8.49363	0.0360171	0.190907	FALSE	1	1	0
7781	SLC30A3	1.1013	7.54541	1.5e-09	6.26e-08	0.761041	7.54615	0.000759849	0.0297268	FALSE	1	0	0
8577	TMEFF1	1.00368	9.65678	8.74e-08	1.38e-06	0.808238	9.61792	0.00578443	0.0815696	FALSE	1	1	1
9497	SLC4A7	1.01457	7.82873	4.83e-07	5.46e-06	0.95227	8.10431	0.00268206	0.0561891	FALSE	1	1	1
10003	NAALAD2	1.14376	6.2249	7.6e-06	5.25e-05	0.897977	6.64468	0.00623157	0.0841357	FALSE	1	0	0
10690	FUT9	1.11081	5.72779	0.000174544	0.000747301	0.214848	5.59444	0.600626	0.79567	FALSE	1	1	1
27133	KCNH5	1.45295	5.65138	3.12e-05	0.000173676	0.92772	5.8335	0.0639028	0.255957	FALSE	1	0	1
50937	CDON	1.06678	7.46262	3.17e-08	6.26e-07	0.701872	7.53822	0.00101979	0.0346456	FALSE	1	1	1
57082	CASC5	1.56474	6.48218	1.64e-07	2.29e-06	0.860024	6.55977	0.0271153	0.166301	FALSE	1	1	1
57697	FANCM	1.14459	6.34908	8.73e-10	4.22e-08	0.905178	6.3251	0.000296032	0.0191967	FALSE	1	0	0
84515	MCM8	1.32542	7.27472	3.62e-07	4.35e-06	0.77226	7.29988	0.0240724	0.15783	FALSE	1	1	1
131096	KCNH8	1.17441	6.86566	5.03e-06	3.72e-05	0.437292	7.38356	0.147035	0.390102	FALSE	1	1	1
151230	KLHL23	1.29455	8.98139	9.96e-09	2.58e-07	0.800321	9.13127	0.0231252	0.154411	FALSE	1	1	1
152518	NFXL1	1.1287	7.92661	1.47e-11	2.43e-09	0.832017	8.05414	0.00250922	0.0543751	FALSE	1	1	1
286410	ATP11C	1.04353	8.17464	6.57e-08	1.11e-06	0.736176	8.22163	0.0111977	0.10912	FALSE	1	1	0
343450	KCNT2	1.26856	7.3469	1.62e-07	2.27e-06	0.400647	7.3942	0.102476	0.326836	FALSE	1	1	1
NA	ASAM	1.02409	7.07111	9.39e-07	9.33e-06	0.720503	7.272	0.0176794	0.136577	FALSE	1	NA	NA
672	BRCA1	1.62559	7.00531	7.02e-09	1.94e-07	0.890973	7.05161	0.0182688	0.138896	FALSE	0	1	1
993	CDC25A	1.36354	6.89167	3.28e-11	4.1e-09	0.805165	6.86203	0.0128251	0.11722	FALSE	0	0	0
1062	CENPE	1.55829	5.27618	2.4e-10	1.67e-08	0.807857	5.37978	0.00608227	0.0833735	FALSE	0	1	1
1662	DDX10	1.14598	7.28297	1.3e-09	5.63e-08	0.766346	7.4925	0.000519045	0.0260867	FALSE	0	1	1
1663	DDX11	1.12166	8.05593	2.15e-10	1.56e-08	0.25762	7.99353	0.268696	0.532002	FALSE	0	1	1
1749	DLX5	1.56988	6.79525	2.17e-07	2.85e-06	0.859701	6.78998	0.170038	0.420281	FALSE	0	1	1
2070	EYA4	1.43804	5.78392	0.00206923	0.00634665	0.926427	6.23414	0.203324	0.459392	FALSE	0	1	1
2146	EZH2	1.70952	8.09484	1.85e-10	1.39e-08	0.8403	8.20194	0.0311812	0.17793	FALSE	0	0	1
2177	FANCD2	1.51043	6.21512	7.79e-09	2.1e-07	0.917988	6.44225	0.00332846	0.0616043	FALSE	0	1	1
2731	GLDC	1.00782	5.88078	8.47e-05	0.00040433	0.943295	6.0301	0.00250943	0.0543751	FALSE	0	1	1
3006	HIST1H1C	1.16021	8.29749	2.36e-08	5.09e-07	0.986195	8.22336	0.00510295	0.0766435	FALSE	0	1	1
3007	HIST1H1D	1.25516	6.80195	3.76e-10	2.3e-08	0.963073	7.22462	0.0132753	0.119233	FALSE	0	0	0
3008	HIST1H1E	1.134	11.0342	5.35e-10	2.91e-08	0.923109	10.7553	0.0132409	0.11906	FALSE	0	1	1
3017	HIST1H2BD	1.03479	7.44045	8.09e-05	0.000389491	0.755505	7.55712	0.0419345	0.20509	FALSE	0	0	0
3070	HELLS	2.01695	6.80721	8.01e-12	1.5e-09	0.949386	7.10737	0.00483597	0.0742016	FALSE	0	1	1
3670	ISL1	1.26935	8.39747	2.66e-06	2.2e-05	0.879839	8.41655	0.00216389	0.0496744	FALSE	0	0	0
4001	LMNB1	1.69774	8.3479	2.02e-10	1.48e-08	0.804199	8.41111	0.0313104	0.178065	FALSE	0	0	1
4172	MCM3	1.08879	7.89538	2.28e-10	1.61e-08	0.907591	7.96712	0.0018562	0.0458707	FALSE	0	0	0
4173	MCM4	1.16923	8.55939	4.85e-13	3.16e-10	0.869315	8.52198	0.00611412	0.0833735	FALSE	0	0	1
4176	MCM7	1.34273	8.85745	1.82e-10	1.37e-08	0.940918	8.99722	0.00847036	0.0959219	FALSE	0	1	1
4436	MSH2	1.07546	8.07063	5.14e-10	2.8e-08	0.685428	8.10375	0.0103041	0.105061	FALSE	0	1	1
4781	NFIB	1.30493	8.85852	5.08e-10	2.79e-08	0.903385	9.1221	0.0073396	0.0902819	FALSE	0	0	0
4808	NHLH2	1.15492	5.23455	0.000177886	0.000760144	0.936649	5.40579	0.0352048	0.188807	FALSE	0	0	0
5111	PCNA	1.35775	8.23233	1.66e-09	6.56e-08	0.962312	8.22838	0.00327548	0.0611332	FALSE	0	0	0
5422	POLA1	1.0626	7.85061	9.98e-08	1.54e-06	0.661001	7.81918	0.0191642	0.142079	FALSE	0	1	1
5426	POLE	1.33498	7.76061	2.26e-10	1.61e-08	0.635508	7.7762	0.0453309	0.213136	FALSE	0	1	1
5427	POLE2	1.48792	5.556	1.69e-10	1.3e-08	0.953793	5.64234	0.00395488	0.0678284	FALSE	0	1	0
5757	PTMA	1.0855	9.75537	2.95e-10	1.95e-08	0.8849	9.7887	0.0049101	0.0748661	FALSE	0	1	1
5983	RFC3	1.42369	8.88134	3.47e-08	6.73e-07	0.765898	8.88888	0.0280711	0.168495	FALSE	0	1	1
5984	RFC4	1.24354	7.89804	8.13e-10	4.02e-08	0.793371	7.97993	0.0171671	0.135446	FALSE	0	1	0
6160	RPL31	1.18172	9.50306	5.85e-08	1.02e-06	0.708784	9.65791	0.00017128	0.014938	FALSE	0	0	1
6170	RPL39	1.27706	10.4609	1.64e-09	6.53e-08	0.961655	10.6292	0.000198895	0.0164698	FALSE	0	1	1
6189	RPS3A	1.04645	10.8517	8.4e-08	1.34e-06	0.793401	10.9455	0.00029515	0.0191967	FALSE	0	1	1
6193	RPS5	1.01545	10.4557	1.82e-07	2.48e-06	0.975529	10.3632	0.000866161	0.0319196	FALSE	0	1	1
6201	RPS7	1.07567	10.8366	4.48e-12	1.05e-09	0.573736	10.784	0.00519427	0.0770995	FALSE	0	1	0
6207	RPS13	1.04146	10.5081	1.32e-07	1.94e-06	0.82438	10.2573	0.0138669	0.121464	FALSE	0	0	0
6599	SMARCC1	1.07863	9.13654	3.47e-12	9.33e-10	0.515434	9.25205	0.0373438	0.194468	FALSE	0	1	1
6632	SNRPD1	1.13371	8.88338	2.46e-09	8.78e-08	0.681752	8.99301	0.00320324	0.0606126	FALSE	0	0	1
6635	SNRPE	1.09294	8.87084	1.38e-08	3.28e-07	0.828687	8.78992	0.00495994	0.0753233	FALSE	0	1	1
6732	SRPK1	1.07113	8.38966	2.02e-09	7.49e-08	0.954003	8.39957	0.000148964	0.0140042	FALSE	0	1	1
6790	AURKA	1.10551	7.1413	8.35e-06	5.69e-05	0.873293	7.03071	0.0141818	0.122585	FALSE	0	1	1
7074	TIAM1	1.13446	7.8866	1.49e-12	6.31e-10	0.818884	7.98613	0.000658262	0.0281831	FALSE	0	0	0
7291	TWIST1	1.00082	7.95284	2.1e-07	2.79e-06	0.683898	8.07126	0.0836852	0.29409	FALSE	0	1	1
7298	TYMS	1.59232	8.97437	3.35e-10	2.13e-08	0.995086	9.02521	0.0110083	0.108544	FALSE	0	1	1
7552	ZNF711	1.27301	7.54058	3.3e-09	1.08e-07	0.816756	7.61502	0.00147678	0.0418619	FALSE	0	1	1
7594	ZNF43	1.26799	7.48011	5.89e-11	6.15e-09	0.517151	7.466	0.124775	0.356476	FALSE	0	0	0
7675	ZNF121	1.46114	7.31857	1.04e-07	1.6e-06	0.65774	7.56253	0.0149704	0.126604	FALSE	0	1	1
7678	ZNF124	1.22839	7.57952	1.39e-08	3.3e-07	0.506913	7.47087	0.0481647	0.220107	FALSE	0	1	1
8187	ZNF239	1.14879	6.19247	7.75e-09	2.09e-07	0.808056	6.26326	0.00325322	0.0609739	FALSE	0	1	1
8294	HIST1H4I	1.26903	7.16058	4.34e-10	2.47e-08	0.752637	7.26418	0.00325215	0.0609739	FALSE	0	NA	NA
8331	HIST1H2AJ	1.61462	9.30348	1.35e-10	1.11e-08	0.884519	9.3212	0.0242148	0.157978	FALSE	0	1	1
8345	HIST1H2BH	1.32465	8.41116	4.83e-10	2.69e-08	0.921088	8.25924	0.0101971	0.105061	FALSE	0	0	0
8358	HIST1H3B	1.3248	7.02856	7.2e-07	7.54e-06	0.849383	6.99283	0.0466924	0.215866	FALSE	0	NA	NA
8370	HIST2H4A	1.21853	9.00143	6.45e-05	0.000321118	0.541048	8.68647	0.24932	0.511827	FALSE	0	NA	NA
8914	TIMELESS	1.03146	7.37575	1.19e-08	2.95e-07	0.812992	7.34119	0.0144577	0.123919	FALSE	0	1	1
9212	AURKB	1.1788	7.68082	5.8e-09	1.67e-07	0.678516	7.70341	0.0141031	0.122236	FALSE	0	0	0
9493	KIF23	1.69375	7.06596	5.66e-09	1.65e-07	0.937845	7.09501	0.0174675	0.135945	FALSE	0	0	0
9585	KIF20B	1.32459	5.56379	9.73e-08	1.51e-06	0.788389	5.69941	0.0177494	0.136761	FALSE	0	1	1
9735	KNTC1	1.35561	7.50564	3.63e-07	4.35e-06	0.986702	7.61736	0.0325051	0.181193	FALSE	0	0	0
9760	TOX	1.24816	8.23552	7.14e-06	5e-05	0.87559	8.14992	0.0333261	0.183837	FALSE	0	0	0
9928	KIF14	1.70644	6.03565	6.9e-08	1.14e-06	0.985266	6.11208	0.0204292	0.145814	FALSE	0	1	1
10036	CHAF1A	1.08123	7.36826	6.37e-11	6.58e-09	0.543117	7.36591	0.0371977	0.194106	FALSE	0	1	1
10051	SMC4	1.23557	7.90382	5.69e-07	6.24e-06	0.662957	7.91034	0.0443084	0.210893	FALSE	0	0	0
10224	ZNF443	1.04987	6.81248	1.15e-07	1.73e-06	0.807921	6.89104	0.00141154	0.0411828	FALSE	0	0	1
10389	SCML2	1.12505	6.46421	8.86e-08	1.39e-06	0.926039	6.41352	0.00477437	0.0741247	FALSE	0	1	1
10541	ANP32B	1.01538	7.94535	1.23e-08	3.03e-07	0.645286	7.88067	0.0107198	0.107166	FALSE	0	1	1
10592	SMC2	1.06024	7.25937	1.22e-06	1.16e-05	0.713101	7.26811	0.0149095	0.126203	FALSE	0	1	1
10615	SPAG5	1.42033	7.31633	1.38e-09	5.84e-08	0.931019	7.38538	0.0276438	0.167579	FALSE	0	1	1
10635	RAD51AP1	2.08885	6.56273	2.73e-10	1.83e-08	0.766585	6.61482	0.0640138	0.256113	FALSE	0	0	0
10721	POLQ	1.50021	5.94494	5.19e-09	1.53e-07	0.676	5.89791	0.0129241	0.117791	FALSE	0	0	1
10926	DBF4	1.43789	5.76553	4.78e-10	2.67e-08	0.910553	5.83409	0.000816409	0.0307978	FALSE	0	0	0
11004	KIF2C	1.17487	6.34221	6.38e-07	6.84e-06	0.61108	6.30284	0.0858088	0.298139	FALSE	0	1	1
11065	UBE2C	1.45557	8.02179	5.73e-09	1.66e-07	0.978243	7.98459	0.00139842	0.0411375	FALSE	0	1	1
11130	ZWINT	1.09146	7.195	8.28e-09	2.22e-07	0.687877	7.20148	0.0271473	0.166301	FALSE	0	0	0
11177	BAZ1A	1.00555	7.10621	2.59e-07	3.32e-06	0.67157	7.29839	0.012646	0.116302	FALSE	0	1	0
23076	RRP1B	1.04154	7.93047	5.69e-11	6.05e-09	0.955622	7.87128	6.06e-05	0.0086848	FALSE	0	1	1
23240	KIAA0922	1.05791	7.51708	2.58e-07	3.31e-06	0.885528	7.73836	0.00097535	0.0334556	FALSE	0	1	1
23310	NCAPD3	1.25804	7.90877	1.81e-11	2.77e-09	0.737545	8.02572	0.0110749	0.108959	FALSE	0	1	1
23649	POLA2	1.20022	7.68232	3.75e-09	1.18e-07	0.715877	7.52091	0.0377503	0.19555	FALSE	0	1	1
25788	RAD54B	1.0579	5.87994	1.16e-08	2.9e-07	0.801618	6.01501	0.00132019	0.0399611	FALSE	0	0	1
26108	PYGO1	1.00667	8.44045	3.77e-06	2.93e-05	0.881691	8.49633	0.00264879	0.0556966	FALSE	0	0	0
26548	ITGB1BP2	1.04492	5.62034	9.07e-12	1.64e-09	0.410349	5.61229	0.0278099	0.168051	FALSE	0	0	0
26586	CKAP2	1.13635	8.50194	6.44e-08	1.09e-06	0.544749	8.45903	0.0582023	0.243639	FALSE	0	1	1
29028	ATAD2	1.67397	7.43917	3.42e-10	2.16e-08	0.911576	7.4791	0.0225136	0.152822	FALSE	0	1	1
29127	RACGAP1	1.27167	7.85193	1.98e-08	4.44e-07	0.979729	7.83576	0.0167263	0.133746	FALSE	0	0	0
29128	UHRF1	1.43919	7.58462	2.17e-11	3.2e-09	0.737026	7.57	0.0258525	0.162845	FALSE	0	NA	NA
51203	NUSAP1	1.7239	6.96187	6.22e-09	1.76e-07	0.926757	6.98003	0.0287564	0.170794	FALSE	0	1	1
51512	GTSE1	1.10871	7.15476	3.86e-09	1.21e-07	0.816598	7.04119	0.0116936	0.111997	FALSE	0	1	1
54801	HAUS6	1.06916	7.29501	1.49e-06	1.37e-05	0.947707	7.36835	0.000702934	0.0293876	FALSE	0	1	1
54821	ERCC6L	1.06904	4.99213	1.83e-08	4.14e-07	0.836528	4.98575	0.00634439	0.0848209	FALSE	0	1	1
54892	NCAPG2	1.17025	7.53014	4.73e-08	8.65e-07	0.81397	7.57254	0.0111468	0.10912	FALSE	0	1	1
55165	CEP55	1.10671	5.96507	1.12e-06	1.08e-05	0.628491	6.06347	0.0745591	0.276803	FALSE	0	1	1
55355	HJURP	1.46919	7.07829	2.55e-11	3.62e-09	0.895277	7.0955	0.00768156	0.092527	FALSE	0	1	1
55635	DEPDC1	1.21892	5.84157	2.53e-06	2.11e-05	0.737009	5.7968	0.0494617	0.223225	FALSE	0	0	0
55728	N4BP2	1.13773	7.60503	2.8e-08	5.74e-07	0.779682	7.75811	0.00409027	0.0689525	FALSE	0	1	1
55835	CENPJ	1.49933	7.24158	3.14e-09	1.05e-07	0.867229	7.38088	0.0152736	0.127708	FALSE	0	0	1
56242	ZNF253	1.07112	6.68005	7e-07	7.39e-06	0.481207	6.68963	0.024799	0.159556	FALSE	0	1	1
56256	SERTAD4	1.0947	6.85287	1.14e-08	2.86e-07	0.706009	6.79706	0.0174444	0.13594	FALSE	0	1	1
56265	CPXM1	1.04241	8.00934	1.22e-07	1.82e-06	0.935569	8.16612	0.00058587	0.027259	FALSE	0	0	0
57116	ZNF695	1.57271	5.78831	2.71e-14	3.91e-11	0.984604	5.91612	0.00147612	0.0418619	FALSE	0	1	1
57335	ZNF286A	1.07536	8.95669	4.25e-10	2.46e-08	0.749414	8.9789	0.00291499	0.0579422	FALSE	0	1	1
63979	FIGNL1	1.17195	6.8588	2.58e-09	9.09e-08	0.726328	7.01672	0.0113939	0.110325	FALSE	0	1	1
64770	CCDC14	1.01249	7.88863	1.24e-07	1.83e-06	0.411649	7.9054	0.126879	0.359997	FALSE	0	0	0
79012	CAMKV	1.47219	7.69744	6.02e-08	1.04e-06	0.729653	7.66227	0.0503178	0.225211	FALSE	0	1	1
79019	CENPM	1.02387	7.75425	4.92e-11	5.51e-09	0.638186	7.68019	0.00521641	0.0770995	FALSE	0	1	1
79070	KDELC1	1.07685	6.9591	2.3e-09	8.36e-08	0.879323	7.05296	0.000728197	0.0297268	FALSE	0	1	1
79075	DSCC1	1.59244	6.02711	6.05e-10	3.22e-08	0.796944	6.21263	0.0167159	0.133746	FALSE	0	1	1
79101	TAF1D	1.31201	6.72532	8.69e-10	4.22e-08	0.925441	7.06743	2.9e-05	0.00584831	FALSE	0	0	1
79172	CENPO	1.33277	7.56731	1.19e-10	1.01e-08	0.94622	7.5125	0.00952943	0.101213	FALSE	0	0	0
79723	SUV39H2	1.20383	7.90368	1.63e-12	6.5e-10	0.866372	7.98768	4.95e-05	0.00778588	FALSE	0	1	1
79731	NARS2	1.09102	7.09295	1.67e-08	3.84e-07	0.797575	7.30046	0.000228453	0.0180583	FALSE	0	1	1
79805	VASH2	1.0115	7.65734	4.11e-14	4.86e-11	0.76995	7.64425	0.0012057	0.0383201	FALSE	0	0	1
79968	WDR76	1.08283	6.50221	1.72e-08	3.93e-07	0.337509	6.58023	0.247164	0.509904	FALSE	0	1	1
80071	CCDC15	1.17188	5.02658	5.57e-11	6.05e-09	0.362638	5.14028	0.154579	0.400668	FALSE	0	1	1
81610	FAM83D	1.03508	6.98959	7.11e-10	3.68e-08	0.994374	7.01517	8.92e-06	0.00384014	FALSE	0	1	1
81624	DIAPH3	1.64384	5.70573	4.71e-08	8.64e-07	0.884732	5.83129	0.0303889	0.176224	FALSE	0	0	0
81931	ZNF93	1.18406	7.39646	1.32e-08	3.17e-07	0.805879	7.43966	0.0102006	0.105061	FALSE	0	1	1
83540	NUF2	1.9751	6.93496	1.13e-09	5.05e-08	0.991766	6.97224	0.0150678	0.126864	FALSE	0	1	0
84250	ANKRD32	1.09758	6.77159	1.63e-07	2.28e-06	0.663151	6.94761	0.08904	0.303019	FALSE	0	0	0
84318	CCDC77	1.01429	7.44141	1.97e-08	4.42e-07	0.809058	7.67338	0.0058322	0.0817889	FALSE	0	1	0
84842	HPDL	1.03373	5.66828	7.05e-11	7.08e-09	0.792191	5.70845	0.00058845	0.027259	FALSE	0	0	0
85236	HIST1H2BK	1.73465	7.90228	1.99e-10	1.46e-08	0.978813	7.75873	0.0068481	0.087917	FALSE	0	1	1
91120	ZNF682	1.24969	6.83512	6.7e-10	3.51e-08	0.817507	6.83657	0.00520157	0.0770995	FALSE	0	1	1
93474	ZNF670	1.16179	6.40603	5.43e-07	6e-06	0.768073	6.45152	0.0191116	0.141785	FALSE	0	1	1
113130	CDCA5	1.36398	7.25477	4.74e-09	1.42e-07	0.932966	7.07227	0.0111375	0.109092	FALSE	0	1	1
129401	NUP35	1.07728	7.10211	2.9e-09	9.84e-08	0.725782	7.22206	0.0134806	0.120182	FALSE	0	0	0
148203	ZNF738	1.19747	7.71346	3.58e-10	2.23e-08	0.842242	7.76062	0.0235803	0.156183	FALSE	0	NA	NA
148213	ZNF681	1.006	4.70143	2.87e-07	3.61e-06	0.678787	4.6964	0.0161998	0.131723	FALSE	0	1	1
150468	CKAP2L	1.51516	6.75613	4.83e-09	1.44e-07	0.833827	6.84221	0.0158308	0.130302	FALSE	0	0	0
153478	PLEKHG4B	1.16179	7.01577	2.41e-12	7.63e-10	0.582295	7.09005	0.0203167	0.145524	FALSE	0	0	0
162655	ZNF519	1.42035	5.26078	1.62e-09	6.51e-08	0.78777	5.26875	0.0230457	0.154054	FALSE	0	0	0
163115	ZNF781	1.0127	5.26521	5.01e-07	5.63e-06	0.382337	5.34889	0.0504494	0.225562	FALSE	0	1	1
171392	ZNF675	1.24391	5.90431	6.94e-07	7.34e-06	0.627356	6.14849	0.0731429	0.274294	FALSE	0	1	1
195828	ZNF367	1.04145	7.47264	1.23e-09	5.43e-08	0.448352	7.37372	0.0598284	0.247235	FALSE	0	1	1
220042	C11orf82	1.19206	5.4472	1.44e-09	6.04e-08	0.743769	5.50933	0.0115938	0.111329	FALSE	0	0	0
220134	SKA1	1.08016	4.74548	4.23e-06	3.22e-05	0.874023	4.74692	0.00830324	0.0952055	FALSE	0	1	1
253714	MMS22L	1.4425	6.89624	4.24e-10	2.46e-08	0.918308	6.87779	0.0015037	0.0420417	FALSE	0	0	0
283248	RCOR2	1.41132	7.74358	5.92e-13	3.5e-10	0.600252	7.59242	0.0510073	0.227256	FALSE	0	1	1
284992	CCDC150	1.26361	5.88807	2.97e-11	3.88e-09	0.545377	5.96297	0.0359217	0.190695	FALSE	0	1	1
285126	DNAJC5G	2.31007	6.09136	7.83e-11	7.6e-09	0.896691	5.99474	0.0325104	0.181193	FALSE	0	1	1
285349	ZNF660	1.04432	6.35424	4.8e-08	8.75e-07	0.542394	6.35369	0.0540689	0.233974	FALSE	0	1	1
348654	GEN1	1.26169	6.90178	3.66e-06	2.85e-05	0.777574	6.86445	0.0103022	0.105061	FALSE	0	0	0
374393	FAM111B	1.22559	6.58141	3.56e-06	2.79e-05	0.646984	6.48374	0.171326	0.421746	FALSE	0	1	1
401541	CENPP	1.00895	6.98296	6.21e-09	1.76e-07	0.812277	6.94675	0.00190079	0.0465608	FALSE	0	1	1
407975	MIR17HG	1.12284	5.74474	3.71e-09	1.18e-07	0.590461	5.77915	0.0229342	0.153955	FALSE	0	1	1
494470	RNF165	1.19581	7.22767	4.89e-07	5.52e-06	0.963816	7.20692	0.00515604	0.0770995	FALSE	0	1	1
728833	FAM72D	1.36107	6.87891	4.02e-08	7.61e-07	0.927894	6.91669	0.00614331	0.0835825	FALSE	0	0	0
767811	H2BFXP	1.17769	6.39565	1.42e-10	1.15e-08	0.951935	6.45067	0.00151586	0.04215	FALSE	0	NA	NA
100130428	LOC100130428	1.50824	6.99596	1.12e-08	2.84e-07	0.220951	7.28639	0.411622	0.658417	FALSE	0	NA	NA
NA	C14orf106	1.02244	6.44714	1.28e-06	1.21e-05	0.612371	6.66669	0.0361794	0.191277	FALSE	0	NA	NA
NA	C4orf43	1.14455	6.41475	1.6e-07	2.25e-06	0.932709	6.72252	0.000171508	0.014938	FALSE	0	NA	NA
NA	KIAA1712	1.3439	7.3744	4.78e-05	0.000249962	0.585258	7.25172	0.04568	0.213703	FALSE	0	NA	NA
NA	C14orf145	1.24443	7.4086	6.95e-08	1.15e-06	0.644954	7.3132	0.0448116	0.212205	FALSE	0	NA	NA
NA	LOC283174	1.48675	6.93851	3.25e-09	1.07e-07	0.867251	7.12293	0.026925	0.165924	FALSE	0	NA	NA
NA	GCFC1	1.05383	9.23681	9.34e-09	2.44e-07	0.449891	9.18801	0.1131	0.342645	FALSE	0	NA	NA

## Sheet: MYCN RNA-Seq Analysis
Gene	logFC	AveExpr	t	P.Value	adj.P.Val	B
MYCNOS	5.62612	0.927063	20.6625	8.87019e-46	1.79887e-41	92.3167
MYCN	4.73857	6.42425	16.3324	3.90981e-35	3.96455e-31	68.7325
CD44	-2.90838	7.90592	-12.4339	7.36846e-25	4.98108e-21	45.7496
KRT19	-5.36753	6.078	-11.8926	2.08076e-23	1.05494e-19	42.4937
RAB3B	-3.01512	5.50748	-11.7244	5.87087e-23	2.12131e-19	41.4824
KCNC4	-1.84757	4.91775	-11.7136	6.27606e-23	2.12131e-19	41.4173
PTPRH	-3.49957	5.14977	-11.6645	8.49653e-23	2.46157e-19	41.1219
SLC18A2	-2.98714	6.55908	-11.6377	1.00225e-22	2.54069e-19	40.9609
ALDH18A1	1.07978	6.01623	11.6088	1.19788e-22	2.69922e-19	40.787
SNX10	-2.64968	4.44663	-11.5458	1.76693e-22	3.58334e-19	40.408
NPW	4.01379	-0.368051	11.4668	2.87499e-22	5.30044e-19	39.9333
SLC38A5	2.71908	2.32412	11.4243	3.73698e-22	6.31549e-19	39.6775
TRAP1	1.0792	7.16371	11.3653	5.37277e-22	8.38153e-19	39.3234
PALM3	-2.64257	3.04867	-11.1647	1.84793e-21	2.67686e-18	38.1186
HPCAL4	-3.03117	4.86127	-11.1163	2.48851e-21	3.36447e-18	37.8283
SLC7A4	-3.44997	1.82233	-10.7228	2.78797e-20	3.53375e-17	35.4713
KIAA0319	-3.19983	2.40441	-10.7037	3.13381e-20	3.73846e-17	35.3572
KPNA6	-0.757985	6.4341	-10.6776	3.67741e-20	4.14322e-17	35.2011
RPUSD4	1.27674	4.66164	10.6141	5.42524e-20	5.79073e-17	34.8218
CYB561	-2.57932	7.96251	-10.4842	1.20051e-19	1.21732e-16	34.0469
KIAA0319L	-0.820643	6.35115	-10.461	1.38347e-19	1.33603e-16	33.9085
CORO2A	-1.86893	5.31436	-10.2382	5.38224e-19	4.96144e-16	32.583
PITHD1	-1.05403	6.08158	-10.2209	5.98096e-19	5.27365e-16	32.4801
STX12	-1.04894	6.42344	-10.2086	6.4468e-19	5.44755e-16	32.407
TXLNA	-0.749283	6.927	-10.1954	6.98409e-19	5.66549e-16	32.3289
NTRK1	-3.86225	6.48574	-10.1765	7.83733e-19	6.11312e-16	32.2164
DANCR	1.31979	5.53548	10.1257	1.06705e-18	8.01472e-16	31.9153
DDX1	2.98267	7.91293	10.1059	1.20361e-18	8.71758e-16	31.7978
RGS9	-3.32296	4.14552	-10.0847	1.36923e-18	9.57517e-16	31.672
AGBL4	-2.15879	1.77976	-10.0343	1.85943e-18	1.25698e-15	31.3735
TP53	1.5731	5.14614	10	2.28925e-18	1.49761e-15	31.1706
TMPRSS15	4.21615	-4.25738	9.9748	2.66725e-18	1.69037e-15	31.0215
BSDC1	-0.754034	7.00328	-9.86211	5.27704e-18	3.24096e-15	30.3558
PHGDH	2.94076	4.75577	9.85728	5.43356e-18	3.24096e-15	30.3273
RPS2	1.3488	10.257	9.85042	5.66379e-18	3.28176e-15	30.2868
NOA1	0.963712	5.03706	9.8328	6.30023e-18	3.54913e-15	30.1829
NOB1	1.02937	5.23578	9.79244	8.0403e-18	4.40695e-15	29.945
DUS3L	0.9728	4.91073	9.74165	1.09256e-17	5.77818e-15	29.6458
DHDDS	-0.856585	5.00061	-9.73885	1.11119e-17	5.77818e-15	29.6294
GSX2	2.43375	-5.82725	9.70868	1.33293e-17	6.75797e-15	29.4519
ZCCHC17	-0.978361	5.4628	-9.656	1.83092e-17	9.05633e-15	29.1422
KCNH3	-2.60212	3.83904	-9.64964	1.90236e-17	9.1857e-15	29.1048
MEAF6	-0.870385	6.55067	-9.63658	2.05798e-17	9.70603e-15	29.0281
PTP4A2	-0.814216	7.40007	-9.61053	2.4074e-17	1.10959e-14	28.8752
VAT1L	-2.1846	7.3661	-9.60499	2.48892e-17	1.12167e-14	28.8427
AHCY	1.2446	7.05908	9.5905	2.7155e-17	1.19718e-14	28.7577
TFAP4	1.11507	4.35462	9.55148	3.4334e-17	1.48147e-14	28.5288
TMEM107	-1.16601	3.85482	-9.51584	4.25292e-17	1.79686e-14	28.32
EPB41L1	-1.07415	8.14235	-9.47553	5.41652e-17	2.24178e-14	28.0841
OSBPL3	-2.48766	5.50596	-9.43361	6.96371e-17	2.82448e-14	27.839
SUSD5	3.04167	0.778483	9.41947	7.57902e-17	3.01378e-14	27.7565
TCF3	1.09258	6.60934	9.41268	7.8939e-17	3.07862e-14	27.7168
TTC39A	-2.44301	3.24484	-9.37462	9.91297e-17	3.79312e-14	27.4946
SYT5	-2.05071	5.98771	-9.34914	1.15444e-16	4.33558e-14	27.346
CCDC24	-1.44796	3.79409	-9.33905	1.22623e-16	4.52145e-14	27.2872
PKIB	-3.04271	3.85602	-9.32318	1.34821e-16	4.88245e-14	27.1947
TTLL12	0.999424	5.70922	9.29197	1.62443e-16	5.77955e-14	27.0129
PCSK1	-2.7177	3.21467	-9.26502	1.90781e-16	6.67077e-14	26.8561
PTBP3	-0.953818	6.31049	-9.25491	2.02634e-16	6.9651e-14	26.7973
PTPRF	-1.16333	7.73877	-9.24999	2.08673e-16	6.96585e-14	26.7686
CADM3	-1.87872	6.3659	-9.2493	2.09525e-16	6.96585e-14	26.7647
THRAP3	-0.570263	7.2111	-9.22495	2.42255e-16	7.92408e-14	26.6231
FBL	1.33188	6.95302	9.22086	2.48231e-16	7.99067e-14	26.5993
ASIC2	-3.04539	3.34486	-9.2115	2.6247e-16	8.31701e-14	26.5449
DCTPP1	1.18869	5.34805	9.18918	2.99777e-16	9.35305e-14	26.4153
TMEM97	1.55958	5.71558	9.1843	3.08598e-16	9.48237e-14	26.387
MUL1	-0.707815	5.21719	-9.18167	3.13467e-16	9.48823e-14	26.3718
TAX1BP1	-0.867826	6.87013	-9.16252	3.51296e-16	1.04769e-13	26.2607
INSRR	-3.70259	4.8252	-9.1466	3.86172e-16	1.13501e-13	26.1683
QTRT1	0.94375	6.03954	9.13569	4.12056e-16	1.19379e-13	26.1051
PPP1R21	-0.761863	5.51521	-9.11175	4.75022e-16	1.35682e-13	25.9664
GPR162	-1.46845	5.61491	-9.09171	5.35048e-16	1.50705e-13	25.8504
NOP14	0.840555	4.89266	9.08287	5.63867e-16	1.56647e-13	25.7992
TKT	1.17619	7.58559	9.06531	6.25768e-16	1.71494e-13	25.6976
KRT15	-3.60953	-2.01732	-9.05478	6.661e-16	1.80114e-13	25.6367
CLSTN3	-1.1439	7.77494	-9.04493	7.06178e-16	1.88438e-13	25.5798
ABCC1	0.87083	6.16783	9.04164	7.20058e-16	1.89034e-13	25.5608
AKIRIN1	-0.850476	6.0102	-9.04001	7.27056e-16	1.89034e-13	25.5513
ZDHHC18	-0.794728	5.50672	-9.03716	7.39455e-16	1.89825e-13	25.5349
IMPDH2	1.19592	7.17426	9.0335	7.55663e-16	1.91561e-13	25.5137
NFIB	1.53097	6.16579	9.00457	8.96893e-16	2.24555e-13	25.3466
RRP9	1.19699	4.52835	8.98567	1.00299e-15	2.48058e-13	25.2376
FAM102B	-1.00581	5.79477	-8.94136	1.3034e-15	3.18469e-13	24.9822
RPS15	1.17643	9.00547	8.92197	1.46162e-15	3.52878e-13	24.8705
SDC3	-1.27759	7.66235	-8.91221	1.54825e-15	3.69067e-13	24.8143
DDX10	1.12826	4.46651	8.91038	1.56508e-15	3.69067e-13	24.8038
NPM1	1.33741	9.10635	8.8986	1.67779e-15	3.91098e-13	24.736
GAP43	-1.79094	8.66386	-8.89659	1.6978e-15	3.91265e-13	24.7244
PRPH	-2.33705	7.57687	-8.88747	1.79163e-15	4.08251e-13	24.672
GLDC	3.06756	0.810102	8.88312	1.83815e-15	4.14195e-13	24.647
PRDM8	2.88397	2.07827	8.87864	1.88744e-15	4.18821e-13	24.6212
RCAN3	-2.86611	1.91535	-8.87751	1.89998e-15	4.18821e-13	24.6147
PQLC2	-0.942059	4.30016	-8.87362	1.94408e-15	4.22397e-13	24.5924
SCN7A	-3.02226	4.74396	-8.87093	1.97512e-15	4.22397e-13	24.5769
VWCE	1.59648	3.78848	8.87063	1.97868e-15	4.22397e-13	24.5752
PIK3CD	-1.37298	5.41206	-8.86522	2.04273e-15	4.31528e-13	24.5441
EEF1B2	1.30159	8.47681	8.85668	2.14825e-15	4.4914e-13	24.495
SCFD2	0.831205	4.21193	8.84277	2.33172e-15	4.82523e-13	24.4151
GPR123	-3.67582	3.57135	-8.83587	2.42838e-15	4.95634e-13	24.3755
DUSP3	-1.21721	6.58176	-8.83478	2.44395e-15	4.95634e-13	24.3693
TRMT1	0.782926	6.3217	8.82186	2.63718e-15	5.29526e-13	24.2951
EBPL	1.3065	4.53269	8.81125	2.80701e-15	5.58099e-13	24.2343
GPR125	1.45829	5.70314	8.78563	3.26347e-15	6.42555e-13	24.0874
RPS3	1.39293	9.94487	8.77328	3.5092e-15	6.84294e-13	24.0166
ARMC6	0.774293	5.74485	8.76616	3.65896e-15	7.06702e-13	23.9759
KNDC1	-4.00267	4.14836	-8.76079	3.77622e-15	7.22469e-13	23.9451
RPL13	1.22791	10.3444	8.75551	3.89519e-15	7.38266e-13	23.9149
LINC00087	-2.05484	2.72472	-8.75225	3.97049e-15	7.4557e-13	23.8962
PAICS	1.23321	6.83256	8.74436	4.15869e-15	7.73746e-13	23.8511
CCNB1IP1	1.45778	5.89436	8.73767	4.32525e-15	7.96142e-13	23.8128
BCAP29	-1.05484	5.82909	-8.7364	4.35758e-15	7.96142e-13	23.8055
CACNA2D3	-2.76788	5.83835	-8.71426	4.96214e-15	8.98502e-13	23.6789
SLC37A4	0.978415	5.05939	8.70204	5.3304e-15	9.56641e-13	23.6091
CAMK2A	-3.29127	3.80384	-8.69964	5.4059e-15	9.61681e-13	23.5954
RPS6KA1	-1.21423	4.64799	-8.68548	5.87367e-15	1.03581e-12	23.5145
MTHFR	-0.859225	5.2212	-8.67903	6.10004e-15	1.06307e-12	23.4776
TMEM50A	-0.894298	6.19352	-8.6774	6.15852e-15	1.06307e-12	23.4683
SMO	2.07465	3.96722	8.67665	6.18551e-15	1.06307e-12	23.4641
ADAMTS19	4.5489	-3.18285	8.66282	6.70731e-15	1.14306e-12	23.3851
RABEPK	0.95545	4.4839	8.65878	6.86746e-15	1.1606e-12	23.3621
RAB15	-1.27548	6.17108	-8.64886	7.27821e-15	1.21985e-12	23.3055
RRAGC	-0.883632	5.00277	-8.6462	7.392e-15	1.22402e-12	23.2904
SARS2	0.833973	4.48424	8.64547	7.42379e-15	1.22402e-12	23.2862
PRDX4	0.947564	5.54179	8.58763	1.04089e-14	1.69088e-12	22.9568
RPL36	1.34223	8.54633	8.58742	1.04221e-14	1.69088e-12	22.9556
SMAP2	-0.822666	6.15464	-8.57985	1.08926e-14	1.75318e-12	22.9126
RPL18A	1.26695	9.42998	8.56586	1.18189e-14	1.88729e-12	22.833
RGS5	-2.74723	9.74668	-8.5625	1.20529e-14	1.90963e-12	22.8139
EEF2K	0.677921	5.30236	8.55276	1.27574e-14	2.00558e-12	22.7586
PLD6	1.1367	4.52672	8.54669	1.32165e-14	2.06177e-12	22.7241
PUS7	1.17094	4.36078	8.54461	1.33782e-14	2.07106e-12	22.7123
AK7	-2.04132	1.25498	-8.54061	1.36934e-14	2.10381e-12	22.6896
RPS11	1.17878	10.3172	8.52506	1.49914e-14	2.28591e-12	22.6013
PPP1R17	-5.33299	0.0243878	-8.52286	1.51854e-14	2.29821e-12	22.5888
OPTN	-1.09219	6.64309	-8.51928	1.5505e-14	2.32335e-12	22.5685
MTHFD2	1.26194	6.12933	8.51844	1.55807e-14	2.32335e-12	22.5637
SOX30	-2.29722	-1.53865	-8.5124	1.61384e-14	2.38496e-12	22.5295
CHP2	-3.47805	-2.20704	-8.51144	1.6229e-14	2.38496e-12	22.524
KIAA1522	-1.05455	5.48979	-8.50815	1.65422e-14	2.41349e-12	22.5054
2016-03-10	-1.68923	0.387751	-8.50229	1.71163e-14	2.47942e-12	22.4721
ACBD6	0.874466	5.50815	8.49283	1.80844e-14	2.58699e-12	22.4185
MED8	-0.73541	5.1955	-8.49255	1.8114e-14	2.58699e-12	22.4169
L1CAM	-1.10721	9.38686	-8.4883	1.85676e-14	2.63322e-12	22.3928
SYT13	-2.27479	6.0932	-8.48694	1.87154e-14	2.63575e-12	22.3851
RNF11	-1.10186	6.82001	-8.48479	1.89503e-14	2.63849e-12	22.373
CNTN1	-2.24459	7.70482	-8.48439	1.8995e-14	2.63849e-12	22.3707
FAM76A	-0.815161	3.69013	-8.48014	1.94702e-14	2.6861e-12	22.3466
GCH1	-2.24836	5.99756	-8.47041	2.06027e-14	2.82313e-12	22.2915
GAS5	1.5286	7.44736	8.46744	2.09616e-14	2.85303e-12	22.2747
KATNB1	0.819779	6.11964	8.45895	2.20217e-14	2.96856e-12	22.2266
EEF1D	0.926757	8.36244	8.45831	2.21032e-14	2.96856e-12	22.223
MPST	1.20847	5.31685	8.44738	2.35517e-14	3.14229e-12	22.1611
MFN2	-0.749585	6.98199	-8.43509	2.52934e-14	3.35262e-12	22.0916
GPBP1L1	-0.708095	6.35482	-8.42329	2.70862e-14	3.56693e-12	22.0249
LRRC47	-0.701264	6.36773	-8.42165	2.73453e-14	3.57783e-12	22.0156
PNPLA8	-0.818242	5.80599	-8.41872	2.78136e-14	3.61576e-12	21.9991
CLCN6	-0.907067	6.1006	-8.40178	3.06845e-14	3.96358e-12	21.9034
ABCC4	1.77235	3.0625	8.37751	3.53154e-14	4.53289e-12	21.7664
LRRTM4	-3.5378	2.16555	-8.37365	3.6114e-14	4.60624e-12	21.7446
ADPRHL2	-0.748788	5.20202	-8.36825	3.72606e-14	4.72278e-12	21.7142
TDRD7	-1.00403	3.90569	-8.35578	4.00485e-14	5.04462e-12	21.6439
CCDC68	-3.43077	3.25035	-8.34691	4.21577e-14	5.27752e-12	21.5939
NR2C2AP	0.839982	3.6593	8.34571	4.24492e-14	5.28141e-12	21.5872
DPP6	-1.89937	7.15628	-8.32169	4.8772e-14	6.03107e-12	21.4519
CCNYL2	4.99854	0.199463	8.31601	5.03986e-14	6.19226e-12	21.42
NME4	1.06981	6.41124	8.31503	5.06861e-14	6.19226e-12	21.4144
APEX1	0.881195	7.59115	8.30515	5.36605e-14	6.51637e-12	21.3589
CGN	-2.01385	3.00142	-8.30384	5.40672e-14	6.52668e-12	21.3515
RPL29	1.31216	9.30463	8.28075	6.17731e-14	7.41278e-12	21.2217
DNAJC8	-0.663033	6.65164	-8.27684	6.31838e-14	7.53745e-12	21.1997
MCF2L2	-1.46675	3.74414	-8.27563	6.36232e-14	7.54549e-12	21.193
RAB11FIP3	0.592546	6.69386	8.24637	7.53078e-14	8.85084e-12	21.0287
NRCAM	-1.52947	7.41132	-8.24593	7.55027e-14	8.85084e-12	21.0262
CAMTA1	-1.06287	7.06501	-8.24143	7.74822e-14	9.03069e-12	21.001
KATNAL1	-0.862863	5.77547	-8.23773	7.91505e-14	9.16296e-12	20.9803
CCDC126	-0.875597	3.36628	-8.23692	7.95208e-14	9.16296e-12	20.9757
TRIM36	-1.51841	5.02234	-8.23344	8.11297e-14	9.29553e-12	20.9562
ATP6V1B1	2.61065	0.440779	8.23185	8.18739e-14	9.3281e-12	20.9473
TELO2	0.518248	5.74192	8.22119	8.70565e-14	9.83654e-12	20.8875
NBAS	1.79709	6.41731	8.22007	8.76187e-14	9.83654e-12	20.8813
PPIE	-0.604399	5.46133	-8.21813	8.86011e-14	9.83654e-12	20.8704
SNIP1	-0.612239	4.5621	-8.21737	8.89911e-14	9.83654e-12	20.8661
ANKRD16	0.678314	3.38188	8.21641	8.94841e-14	9.83654e-12	20.8607
KCNC4-AS1	-2.35318	-0.547466	-8.216	8.96954e-14	9.83654e-12	20.8585
FAM213B	-0.933508	5.42621	-8.21593	8.97317e-14	9.83654e-12	20.8581
IL18	-2.19827	2.94659	-8.21161	9.1987e-14	1.00295e-11	20.8339
LIPJ	-2.23078	-1.7628	-8.18347	1.0813e-13	1.17266e-11	20.6764
ABCA12	4.28512	-0.060415	8.18131	1.0948e-13	1.18099e-11	20.6643
CAP1	-0.864173	7.67145	-8.17295	1.14863e-13	1.23249e-11	20.6176
RPS15A	1.13188	9.27762	8.16936	1.17258e-13	1.25158e-11	20.5975
LAPTM4B	0.977228	7.19468	8.14944	1.31451e-13	1.39572e-11	20.4862
HPDL	1.90101	2.17719	8.13227	1.45047e-13	1.52623e-11	20.3904
C19orf48	1.37252	5.61019	8.13203	1.45247e-13	1.52623e-11	20.389
RRP1	0.747948	5.50953	8.12826	1.48424e-13	1.54377e-11	20.368
CTNND2	-1.25218	5.94786	-8.12824	1.4844e-13	1.54377e-11	20.3678
SCRT2	3.02941	2.57012	8.11461	1.60496e-13	1.66064e-11	20.2918
CREB3L4	1.14388	4.48757	8.10969	1.65073e-13	1.69933e-11	20.2644
RPL18	1.04773	9.50736	8.09961	1.74877e-13	1.79117e-11	20.2082
PPRC1	0.831711	5.94977	8.09392	1.8067e-13	1.8356e-11	20.1765
VAX2	3.91037	-0.460857	8.09357	1.81026e-13	1.8356e-11	20.1746
CLSTN1	-0.899488	8.27856	-8.08595	1.8909e-13	1.90149e-11	20.1322
BSPRY	-2.95051	0.178202	-8.08562	1.89445e-13	1.90149e-11	20.1303
NPRL3	0.698806	5.63528	8.0848	1.90336e-13	1.90149e-11	20.1258
EPB41L4B	-1.36044	5.27318	-8.08178	1.93653e-13	1.92514e-11	20.1089
SIGLEC8	-2.22699	1.1958	-8.06681	2.10959e-13	2.08695e-11	20.0256
CD320	0.892557	5.28318	8.05009	2.32097e-13	2.28491e-11	19.9326
S100PBP	-0.671692	5.70173	-8.0466	2.36765e-13	2.31961e-11	19.9132
PIP4K2C	-0.708969	4.9481	-8.04465	2.39408e-13	2.32842e-11	19.9024
SLC43A1	1.4431	2.89508	8.04425	2.39961e-13	2.32842e-11	19.9002
MTF1	-0.727641	4.22355	-8.04187	2.43243e-13	2.34904e-11	19.8869
DKC1	0.774593	6.17187	8.04086	2.44652e-13	2.35144e-11	19.8813
RUNDC1	-0.923278	5.19656	-8.03977	2.46171e-13	2.35488e-11	19.8753
COL6A5	-2.6986	-2.22592	-8.03	2.60287e-13	2.47823e-11	19.821
NCL	0.79521	9.26078	8.02846	2.62585e-13	2.48842e-11	19.8125
KCND2	-2.32121	4.44354	-8.02601	2.66276e-13	2.51166e-11	19.7989
VARS	0.793507	7.06279	8.02501	2.67799e-13	2.51433e-11	19.7933
ADAMTS17	1.92523	2.82721	8.02027	2.75129e-13	2.57125e-11	19.767
ARHGEF10L	-1.07575	6.77104	-8.01036	2.91119e-13	2.70821e-11	19.712
CHRNA3	-1.66303	7.86674	-8.00493	3.00267e-13	2.76518e-11	19.6819
PPA1	1.02387	7.00491	8.00458	3.00867e-13	2.76518e-11	19.68
RPSA	1.14111	9.86204	8.00368	3.02421e-13	2.76518e-11	19.6749
ATP6V1C1	-0.698603	6.21532	-8.00352	3.02697e-13	2.76518e-11	19.6741
APH1B	-0.793257	4.39826	-7.99965	3.09447e-13	2.81417e-11	19.6526
TRNAU1AP	-0.708558	4.62725	-7.99816	3.12083e-13	2.82546e-11	19.6443
KRT9	-4.5629	-1.47569	-7.99613	3.15712e-13	2.84562e-11	19.6331
SNHG1	1.25322	6.95887	7.99363	3.2024e-13	2.87366e-11	19.6192
ABLIM3	-1.43612	6.1312	-7.99018	3.26591e-13	2.91774e-11	19.6001
SCN9A	-1.49727	6.6249	-7.98624	3.33987e-13	2.97073e-11	19.5783
HSPD1	1.00243	8.48494	7.97115	3.63935e-13	3.22297e-11	19.4947
FUCA1	-1.62595	5.30452	-7.95778	3.92699e-13	3.46258e-11	19.4206
KCNJ10	-2.57158	1.39604	-7.9285	4.63754e-13	4.0714e-11	19.2588
PTPRS	0.906868	8.27853	7.92176	4.81846e-13	4.212e-11	19.2215
KIAA0922	1.04974	5.10051	7.92045	4.8543e-13	4.22512e-11	19.2143
UBE2I	0.506295	7.28905	7.91947	4.88142e-13	4.23056e-11	19.2089
KLRG2	2.47229	-2.96279	7.90091	5.42326e-13	4.68016e-11	19.1064
RNLS	-1.35267	1.74153	-7.89822	5.50646e-13	4.73182e-11	19.0916
RPLP1	1.1122	9.72827	7.89658	5.55786e-13	4.75584e-11	19.0826
C6orf89	-0.601488	6.97447	-7.89032	5.75867e-13	4.90696e-11	19.048
SLC31A2	-0.925058	3.75715	-7.87678	6.21777e-13	5.276e-11	18.9734
MLST8	0.590576	5.67542	7.87258	6.36752e-13	5.38055e-11	18.9502
RPS4X	1.14918	10.2142	7.85955	6.85475e-13	5.76823e-11	18.8784
DNALI1	-1.08841	4.50518	-7.85345	7.09528e-13	5.94596e-11	18.8449
LDHB	1.11817	8.66029	7.84691	7.36261e-13	6.14459e-11	18.8089
YIPF1	-0.824395	4.93048	-7.8454	7.42565e-13	6.16825e-11	18.8006
DNAJC16	-0.676624	4.5262	-7.84478	7.45179e-13	6.16825e-11	18.7972
RPL3	0.917662	11.011	7.84284	7.53421e-13	6.21113e-11	18.7865
FAM13A	1.49911	3.48653	7.83969	7.66958e-13	6.29713e-11	18.7691
SLC19A1	1.00444	4.69644	7.80496	9.33109e-13	7.60758e-11	18.5783
LACC1	-1.22007	3.01356	-7.80478	9.34066e-13	7.60758e-11	18.5773
RBMX	0.77974	8.12829	7.7826	1.05852e-12	8.58674e-11	18.4556
SNRPA	0.728026	6.51308	7.78094	1.06844e-12	8.63268e-11	18.4465
MAP1A	-1.7012	6.57062	-7.77831	1.08439e-12	8.72677e-11	18.4321
UBASH3B	-1.46871	3.06517	-7.76733	1.15359e-12	9.24696e-11	18.3719
PSMG4	0.77872	3.81497	7.76453	1.17193e-12	9.35695e-11	18.3566
NPM3	1.08616	4.29839	7.75899	1.20906e-12	9.60156e-11	18.3262
SFXN4	0.892226	4.15611	7.75844	1.21279e-12	9.60156e-11	18.3232
TPPP3	-1.91297	5.87726	-7.75786	1.21677e-12	9.60156e-11	18.32
TG	-2.42051	4.02126	-7.75646	1.22637e-12	9.63987e-11	18.3124
CCDC101	0.817508	4.62823	7.75482	1.23778e-12	9.692e-11	18.3034
NRG1	-1.46968	3.91708	-7.74836	1.28359e-12	1.0012e-10	18.268
RND2	-1.14841	6.27933	-7.73463	1.38663e-12	1.07743e-10	18.1929
GMPS	0.920186	5.00561	7.7204	1.50206e-12	1.16267e-10	18.1151
METTL16	0.70686	5.24457	7.71099	1.58363e-12	1.22114e-10	18.0636
IL7	-2.78075	3.90396	-7.70657	1.62342e-12	1.24708e-10	18.0395
CAPZB	-0.644828	7.45913	-7.69669	1.716e-12	1.31323e-10	17.9855
POLR3D	1.1425	5.09748	7.69549	1.72756e-12	1.31711e-10	17.979
PPCS	-0.696947	4.62966	-7.68876	1.79401e-12	1.36264e-10	17.9423
FTSJ1	0.485905	5.61897	7.68641	1.81785e-12	1.37559e-10	17.9295
EXOSC7	0.738477	4.66182	7.68525	1.82964e-12	1.37937e-10	17.9232
VAT1	-1.09006	9.26263	-7.68065	1.87749e-12	1.41021e-10	17.8981
RPL37	1.14717	9.34903	7.65601	2.1554e-12	1.61297e-10	17.7638
PES1	0.706746	6.42906	7.65307	2.19113e-12	1.63368e-10	17.7478
LRP3	0.688546	6.91793	7.64924	2.23872e-12	1.66305e-10	17.7269
RPLP0	1.01587	10.6576	7.64794	2.25506e-12	1.66907e-10	17.7198
RAB8B	-0.780723	5.402	-7.63752	2.39034e-12	1.76276e-10	17.6631
NTHL1	0.86865	4.57745	7.63392	2.439e-12	1.79213e-10	17.6435
C2CD4C	-1.59268	5.12019	-7.62612	2.54764e-12	1.8652e-10	17.6012
DNAJC6	-1.22365	6.43272	-7.61832	2.66129e-12	1.93697e-10	17.5587
DUSP4	2.71291	4.34767	7.61796	2.66654e-12	1.93697e-10	17.5568
MRPL4	0.674265	5.62931	7.61744	2.67432e-12	1.93697e-10	17.554
CDC42	-0.6853	7.83965	-7.60691	2.83641e-12	2.04706e-10	17.4967
BAIAP3	-2.59927	4.17981	-7.60504	2.86608e-12	2.06114e-10	17.4866
DBH	-3.05511	8.97709	-7.59961	2.9544e-12	2.11715e-10	17.4571
CDH22	-3.03652	2.5118	-7.59686	3.00008e-12	2.14231e-10	17.4422
KIAA1598	-1.01848	6.4096	-7.57222	3.44197e-12	2.44923e-10	17.3085
JAZF1	-1.00228	5.91261	-7.5704	3.47698e-12	2.46304e-10	17.2987
LRRC63	-2.25484	0.768101	-7.56996	3.48566e-12	2.46304e-10	17.2963
TPMT	-0.788508	4.36473	-7.56129	3.65811e-12	2.56853e-10	17.2493
SSR4	0.828161	6.76033	7.56118	3.66029e-12	2.56853e-10	17.2487
VAMP3	-0.944018	6.00693	-7.5601	3.68236e-12	2.57511e-10	17.2429
CEACAM19	2.44112	2.45352	7.55557	3.77658e-12	2.63192e-10	17.2183
SLC30A3	4.05762	2.34043	7.55438	3.80174e-12	2.64038e-10	17.2119
IFRD2	0.761395	4.72832	7.5537	3.816e-12	2.64125e-10	17.2082
KIFAP3	-0.900874	6.66483	-7.55204	3.85139e-12	2.65667e-10	17.1993
MAPRE2	-0.705704	7.30982	-7.55132	3.86702e-12	2.65841e-10	17.1953
FAM3C	-0.824409	6.08366	-7.54113	4.09248e-12	2.8039e-10	17.1402
RPL14	1.11859	9.05726	7.54009	4.11626e-12	2.8107e-10	17.1346
RPL23A	1.01269	9.32596	7.52393	4.50337e-12	3.06471e-10	17.0472
CCDC30	-1.29582	1.39349	-7.52208	4.54985e-12	3.08598e-10	17.0372
SERPINA5	-3.27956	4.13161	-7.52043	4.59196e-12	3.10417e-10	17.0282
KCNAB2	-1.13771	5.82261	-7.51904	4.62753e-12	3.10773e-10	17.0207
TAF1D	1.34084	4.8087	7.51902	4.62788e-12	3.10773e-10	17.0207
CASZ1	-2.18459	4.83375	-7.51814	4.65069e-12	3.11274e-10	17.0159
PPP1R8	-0.473914	5.58165	-7.50694	4.94923e-12	3.30166e-10	16.9554
RPL22L1	1.65394	4.34601	7.49674	5.23762e-12	3.48259e-10	16.9003
RPL10	0.90021	10.5148	7.49544	5.27555e-12	3.49635e-10	16.8933
ODC1	1.27081	7.67476	7.49477	5.29511e-12	3.49787e-10	16.8897
RSL1D1	0.862176	7.12425	7.48974	5.44492e-12	3.58516e-10	16.8626
KIAA0513	-1.91481	4.43784	-7.4854	5.57759e-12	3.66063e-10	16.8392
FAM131A	-0.693028	5.63325	-7.48086	5.72001e-12	3.74199e-10	16.8147
RNF220	-0.512557	6.49718	-7.47929	5.76998e-12	3.76255e-10	16.8062
ILF3	0.65831	9.28202	7.47724	5.83574e-12	3.79323e-10	16.7952
MRRF	0.577382	4.72927	7.47284	5.9798e-12	3.87445e-10	16.7715
GPR63	1.66093	1.52667	7.46951	6.09128e-12	3.93398e-10	16.7535
SLCO5A1	2.08476	0.91452	7.46876	6.11666e-12	3.93398e-10	16.7495
SYT7	-1.51029	7.52324	-7.46798	6.1432e-12	3.93398e-10	16.7453
GNL3	0.883939	6.26209	7.4678	6.14927e-12	3.93398e-10	16.7443
ATP13A2	-0.95459	6.85429	-7.46593	6.21331e-12	3.96245e-10	16.7342
TRIM54	3.56862	1.27187	7.46303	6.31411e-12	4.00338e-10	16.7186
FJX1	1.29324	4.76639	7.46261	6.32871e-12	4.00338e-10	16.7164
STK40	-0.751711	5.81589	-7.46238	6.33671e-12	4.00338e-10	16.7151
CEP104	-0.732042	5.16162	-7.46132	6.37413e-12	4.01451e-10	16.7094
RFT1	0.623194	4.20268	7.45876	6.46505e-12	4.05917e-10	16.6956
ECEL1	-2.76777	6.25025	-7.45633	6.55259e-12	4.10144e-10	16.6826
PRUNE2	-1.94429	6.33826	-7.45099	6.74925e-12	4.21063e-10	16.6538
PRMT1	0.665147	7.58244	7.45048	6.76857e-12	4.21063e-10	16.651
C22orf42	-3.8233	-1.83391	-7.44275	7.06415e-12	4.38107e-10	16.6095
LIAS	0.692479	3.89618	7.43922	7.20373e-12	4.45401e-10	16.5905
GLTSCR2	0.923071	8.25939	7.43659	7.30901e-12	4.50537e-10	16.5764
CBS	1.46072	6.64966	7.43361	7.43052e-12	4.56639e-10	16.5603
PLEKHD1	-3.34935	-0.385232	-7.42807	7.66186e-12	4.67474e-10	16.5305
RPL7A	1.01098	10.0742	7.4278	7.67336e-12	4.67474e-10	16.5291
RPL32	1.14431	9.73444	7.42773	7.67597e-12	4.67474e-10	16.5287
SCG2	-1.85535	8.63263	-7.42662	7.72323e-12	4.6786e-10	16.5228
FAM207A	0.701525	3.84034	7.4265	7.72845e-12	4.6786e-10	16.5221
MRPS2	0.750648	4.90772	7.42427	7.82415e-12	4.72244e-10	16.5102
PARP16	0.669287	4.07512	7.42224	7.91278e-12	4.76176e-10	16.4992
RAB27B	-2.02614	3.47691	-7.42144	7.94763e-12	4.76858e-10	16.4949
PYCR1	1.19046	6.55223	7.42069	7.98085e-12	4.77438e-10	16.4909
TM2D1	-0.739946	4.41932	-7.41942	8.03674e-12	4.79368e-10	16.4841
GPD2	-0.773211	5.29581	-7.41765	8.1161e-12	4.82682e-10	16.4745
DDX54	0.650748	5.52993	7.41112	8.41385e-12	4.98927e-10	16.4395
GPR158	-1.8536	4.28349	-7.40663	8.62524e-12	5.08732e-10	16.4154
SLC2A6	-1.01207	4.42209	-7.40654	8.62938e-12	5.08732e-10	16.4149
NYAP1	-1.04567	5.91331	-7.40538	8.68507e-12	5.10531e-10	16.4087
RGAG4	-0.960757	6.58684	-7.40478	8.71358e-12	5.10727e-10	16.4055
KCTD8	3.18913	-3.59377	7.39881	9.00563e-12	5.26323e-10	16.3735
GPATCH3	-0.652972	4.00773	-7.39556	9.16851e-12	5.34303e-10	16.356
WBSCR28	-2.5618	-3.54292	-7.39272	9.31374e-12	5.41211e-10	16.3408
DNAJC5G	3.92014	-0.112661	7.38332	9.80892e-12	5.68357e-10	16.2904
LHFPL5	-1.69667	1.42716	-7.38245	9.85615e-12	5.69467e-10	16.2857
MKRN1	-0.632904	7.38426	-7.37896	1.00476e-11	5.78878e-10	16.267
MAP7D1	-0.831659	7.9225	-7.37551	1.02406e-11	5.87359e-10	16.2486
PABPC1	0.857567	9.28374	7.3753	1.02527e-11	5.87359e-10	16.2474
NETO2	1.3055	4.98848	7.3746	1.02922e-11	5.87961e-10	16.2437
SLCO3A1	-1.5088	5.95064	-7.37268	1.04015e-11	5.91106e-10	16.2334
PTPRN2	-1.13601	7.42016	-7.37261	1.04056e-11	5.91106e-10	16.233
UBAP2	0.530742	5.98509	7.36992	1.05609e-11	5.98257e-10	16.2186
PAG1	-1.47339	6.23057	-7.36712	1.07254e-11	6.05882e-10	16.2036
DCAF4	0.858841	3.82197	7.36377	1.09249e-11	6.15437e-10	16.1857
KIAA0087	-2.83212	1.57481	-7.35782	1.12891e-11	6.34189e-10	16.1538
DNAAF3	-2.03978	-0.955976	-7.35549	1.14343e-11	6.40575e-10	16.1414
NTN1	-2.88495	2.93968	-7.35034	1.17636e-11	6.5635e-10	16.1138
P2RX6	-1.78499	2.69787	-7.35007	1.17806e-11	6.5635e-10	16.1124
LRRC42	-0.702445	5.01333	-7.349	1.18505e-11	6.58434e-10	16.1067
FAM134B	-1.39431	4.83408	-7.34555	1.20773e-11	6.69202e-10	16.0882
SLC1A5	1.38908	5.15489	7.34139	1.23572e-11	6.82846e-10	16.066
S100A7	-2.5229	-4.05262	-7.34016	1.24409e-11	6.85601e-10	16.0594
TFEC	-1.89652	2.12366	-7.33769	1.26113e-11	6.9311e-10	16.0462
GNG2	-1.10136	7.96707	-7.3368	1.26729e-11	6.94555e-10	16.0415
CC2D1B	-0.719835	5.69211	-7.33632	1.27061e-11	6.94555e-10	16.0389
PRKCB	-2.17136	5.30994	-7.33441	1.28404e-11	7.00008e-10	16.0287
TMA16	1.1401	3.49477	7.33227	1.29927e-11	7.06412e-10	16.0172
MRPL15	0.730199	5.0668	7.33148	1.30492e-11	7.07588e-10	16.013
ARSG	1.72584	1.12295	7.33068	1.31067e-11	7.08808e-10	16.0087
PINK1	-1.13739	4.06873	-7.32474	1.35413e-11	7.30364e-10	15.977
PER3	-1.11464	4.8289	-7.3192	1.39596e-11	7.50928e-10	15.9475
TBL3	0.635703	5.42003	7.31493	1.4291e-11	7.66723e-10	15.9247
SCARF2	1.49103	4.35666	7.30406	1.51701e-11	8.11739e-10	15.8667
TOP1MT	1.26861	4.06311	7.28928	1.64508e-11	8.77954e-10	15.7879
RNF19B	-1.04402	4.88247	-7.28522	1.68212e-11	8.93855e-10	15.7663
SLC43A2	-0.802588	5.96251	-7.28492	1.68492e-11	8.93855e-10	15.7647
PHF13	-0.564805	5.21713	-7.28457	1.6881e-11	8.93855e-10	15.7629
ATP6V1B2	-0.70713	7.80036	-7.28356	1.69747e-11	8.96476e-10	15.7575
NUP93	0.768294	5.42845	7.27492	1.77983e-11	9.37529e-10	15.7114
SLC16A1	1.08396	5.16321	7.27392	1.78958e-11	9.40223e-10	15.7061
REEP6	-1.58481	3.375	-7.27343	1.79444e-11	9.40343e-10	15.7035
CCDC92	-0.705181	6.47929	-7.26215	1.90874e-11	9.9766e-10	15.6435
EYA3	-0.626027	5.25524	-7.25696	1.96375e-11	1.02377e-09	15.6159
RPL31	1.05495	9.51071	7.25199	2.0179e-11	1.04931e-09	15.5895
GFRA3	-2.21997	6.27184	-7.25	2.03989e-11	1.05778e-09	15.5789
CDKN2D	-0.992142	5.60825	-7.24958	2.04461e-11	1.05778e-09	15.5767
SNORA79	1.79879	-5.74723	7.24903	2.05082e-11	1.05829e-09	15.5738
H2AFX	1.23988	5.78022	7.24773	2.06544e-11	1.06144e-09	15.5669
LSM7	0.870551	5.9166	7.24755	2.0674e-11	1.06144e-09	15.5659
ANKRD33	-2.68527	-2.0884	-7.24623	2.08243e-11	1.06645e-09	15.5589
KXD1	0.576939	5.92579	7.24062	2.14725e-11	1.09688e-09	15.5291
TTLL6	-4.63249	-1.27913	-7.23059	2.26833e-11	1.15582e-09	15.4758
SCPEP1	-1.35978	6.09752	-7.23001	2.27553e-11	1.15589e-09	15.4728
ALKBH2	0.953513	4.63592	7.22966	2.27986e-11	1.15589e-09	15.4709
SYT17	-1.3341	4.47633	-7.22722	2.31044e-11	1.16847e-09	15.458
SAMD9	-1.57671	3.37818	-7.22303	2.36394e-11	1.19255e-09	15.4357
TRIM71	3.14383	-3.88204	7.21835	2.42504e-11	1.22034e-09	15.4109
EPB41L4A-AS1	1.02836	5.72712	7.21151	2.51736e-11	1.26305e-09	15.3746
ALDH1B1	0.865251	4.74227	7.21114	2.52237e-11	1.26305e-09	15.3727
PPP4R4	-3.59093	-0.500351	-7.20899	2.55213e-11	1.27481e-09	15.3613
C18orf42	-3.14144	-0.790013	-7.20852	2.55874e-11	1.27497e-09	15.3588
PEF1	-0.692185	6.15349	-7.20645	2.58779e-11	1.28413e-09	15.3478
ALS2CL	-1.72999	4.91491	-7.20631	2.5898e-11	1.28413e-09	15.3471
PNRC2	-0.679111	6.02084	-7.20485	2.61049e-11	1.29124e-09	15.3394
PGC	-2.06211	-2.17083	-7.19835	2.70459e-11	1.33453e-09	15.305
CAPS2	-1.44163	2.31815	-7.1975	2.71729e-11	1.33754e-09	15.3004
STT3A	0.675474	6.3044	7.19175	2.80369e-11	1.37673e-09	15.27
ANKRD22	-2.45503	-0.906849	-7.19099	2.81534e-11	1.3772e-09	15.266
PNPLA1	-1.72803	-2.18437	-7.1908	2.81824e-11	1.3772e-09	15.265
CD3EAP	0.899008	1.58133	7.18481	2.91184e-11	1.41952e-09	15.2333
CERK	0.797944	7.74653	7.18061	2.97919e-11	1.44887e-09	15.211
SLC35F2	1.82937	2.23317	7.17903	3.00484e-11	1.45785e-09	15.2027
CCNA1	-1.67966	3.08578	-7.17763	3.02797e-11	1.46557e-09	15.1953
TRIM62	-0.959797	3.57185	-7.16801	3.19079e-11	1.54069e-09	15.1444
C20orf197	-1.81695	-1.35725	-7.16321	3.27522e-11	1.5777e-09	15.119
TIMM13	0.84755	6.0982	7.15886	3.35357e-11	1.61162e-09	15.0961
SIGLEC10	-1.39011	2.81973	-7.1521	3.47913e-11	1.66801e-09	15.0604
CPA4	-2.48901	1.15017	-7.14695	3.57784e-11	1.71129e-09	15.0332
ZNF764	0.589788	4.28608	7.14241	3.66725e-11	1.74992e-09	15.0092
SRSF4	-0.478152	6.98628	-7.14037	3.70818e-11	1.7653e-09	14.9985
FMNL1	-1.13864	6.01132	-7.13253	3.86936e-11	1.83772e-09	14.9571
MGAT4A	-0.69806	5.68872	-7.1313	3.89535e-11	1.84574e-09	14.9506
EEF1A1	0.847423	12.6734	7.12888	3.94688e-11	1.8658e-09	14.9379
UNC13D	-1.57402	5.58914	-7.12759	3.97446e-11	1.87447e-09	14.9311
CCDC132	-0.856417	5.42782	-7.12596	4.00994e-11	1.88322e-09	14.9225
CAMKK2	0.690231	6.65549	7.12588	4.01159e-11	1.88322e-09	14.9221
CTD-2297D10.2	3.21366	-1.32492	7.1252	4.02645e-11	1.88583e-09	14.9185
TGM3	-2.01492	-2.21404	-7.11712	4.20686e-11	1.96579e-09	14.8759
LZIC	-0.641556	4.13924	-7.11618	4.22842e-11	1.97132e-09	14.871
TYSND1	0.685058	4.04235	7.11368	4.28611e-11	1.99363e-09	14.8578
RGS7	-1.49167	4.86858	-7.10539	4.4832e-11	2.08053e-09	14.8142
FKBP7	0.790834	4.46052	7.09803	4.66558e-11	2.16023e-09	14.7755
GNPTAB	-0.650414	5.74725	-7.09685	4.69555e-11	2.16915e-09	14.7692
ALG9	0.693119	5.14137	7.09403	4.76768e-11	2.19747e-09	14.7544
RASSF4	-1.32911	5.81069	-7.09251	4.80702e-11	2.2092e-09	14.7465
RPL34	1.03294	9.1317	7.09221	4.81491e-11	2.2092e-09	14.7449
NONO	0.633735	9.01535	7.08305	5.05975e-11	2.31629e-09	14.6967
RPS12	0.999401	9.41699	7.07618	5.25125e-11	2.39854e-09	14.6606
SNCA	-1.71297	5.09907	-7.06979	5.43602e-11	2.47736e-09	14.6271
PTDSS1	0.711955	6.17948	7.06416	5.60411e-11	2.54824e-09	14.5975
GNB2L1	1.06336	10.2721	7.06326	5.63125e-11	2.55485e-09	14.5928
PPP1R1A	-3.71794	1.9021	-7.06185	5.67446e-11	2.56871e-09	14.5854
ZFAND3	-0.659298	6.95263	-7.06072	5.70924e-11	2.57486e-09	14.5795
THOC6	0.844957	4.67166	7.06058	5.71344e-11	2.57486e-09	14.5787
GABRA5	3.5042	-1.44632	7.05695	5.82665e-11	2.62006e-09	14.5597
EEF2	0.876854	11.4949	7.056	5.85665e-11	2.62518e-09	14.5547
TIMM8B	0.920305	4.51194	7.05577	5.86393e-11	2.62518e-09	14.5535
ALKBH8	0.858495	3.37591	7.05274	5.96065e-11	2.6626e-09	14.5376
TMEM222	-0.558968	5.72182	-7.04872	6.09151e-11	2.71507e-09	14.5165
PRR22	1.21928	1.98383	7.04616	6.17633e-11	2.74235e-09	14.5031
SMARCA1	-0.673397	6.62971	-7.04606	6.17976e-11	2.74235e-09	14.5026
ATP5G2	0.753632	8.11388	7.04301	6.28232e-11	2.78178e-09	14.4866
NHLRC1	-1.15433	1.59484	-7.0268	6.85648e-11	3.0294e-09	14.4017
PPT1	-0.738009	6.58052	-7.02532	6.91111e-11	3.0469e-09	14.394
RPS16	0.999429	9.35967	7.02431	6.94919e-11	3.05704e-09	14.3887
NT5C1A	-2.51493	-0.420964	-7.02048	7.094e-11	3.11399e-09	14.3687
DDC	-2.62095	6.42128	-7.01304	7.38412e-11	3.23434e-09	14.3298
USP3	0.758308	5.53401	7.0116	7.44184e-11	3.2526e-09	14.3222
USP33	-0.656789	6.5544	-7.00972	7.51723e-11	3.27848e-09	14.3124
MASP2	-1.28476	4.03991	-7.00903	7.54554e-11	3.28377e-09	14.3088
SCRN1	-0.698257	7.97564	-7.0052	7.70265e-11	3.34496e-09	14.2888
BZW2	1.03852	6.31639	7.00212	7.83137e-11	3.3936e-09	14.2727
HYDIN	-2.39623	2.96974	-6.99952	7.94191e-11	3.43416e-09	14.2591
CELA2B	-1.26121	-1.14125	-6.99686	8.05629e-11	3.47621e-09	14.2452
TLN2	-1.35807	6.91209	-6.99279	8.23472e-11	3.54565e-09	14.2239
SNHG7	1.21719	5.44155	6.98865	8.42012e-11	3.6178e-09	14.2023
PLEKHG4B	4.23157	1.31553	6.98736	8.47875e-11	3.63529e-09	14.1956
TMIE	-1.60415	3.12408	-6.98541	8.56796e-11	3.66579e-09	14.1854
C16orf13	0.678511	5.68359	6.9839	8.63783e-11	3.6879e-09	14.1776
GOLGA6C	-1.86616	-3.21212	-6.97547	9.03848e-11	3.85085e-09	14.1336
PCOLCE	1.38298	6.78954	6.97445	9.08775e-11	3.86372e-09	14.1283
KCNC3	-1.72962	4.27926	-6.97316	9.15132e-11	3.88261e-09	14.1215
SLITRK4	3.00254	0.433145	6.97058	9.27875e-11	3.92846e-09	14.1081
BOP1	0.908049	6.19301	6.96945	9.33534e-11	3.94108e-09	14.1022
LIFR	-1.40232	5.37002	-6.96921	9.34744e-11	3.94108e-09	14.1009
RPS14	1.02969	9.50247	6.96872	9.37219e-11	3.94332e-09	14.0984
DSEL	-1.70855	4.47882	-6.96778	9.41957e-11	3.94498e-09	14.0935
GRIP2	1.95805	2.86164	6.9676	9.42881e-11	3.94498e-09	14.0925
CPEB4	-0.994335	6.08399	-6.96748	9.4345e-11	3.94498e-09	14.0919
RSPH1	-1.64878	0.95451	-6.96641	9.48906e-11	3.95963e-09	14.0863
ANAPC1	0.577745	5.34819	6.96516	9.55307e-11	3.97816e-09	14.0798
TNFRSF9	-3.02927	0.218628	-6.9618	9.72677e-11	4.04219e-09	14.0623
RBM48	-0.783976	4.57828	-6.95824	9.91463e-11	4.11183e-09	14.0438
ELK1	0.585343	5.10571	6.95549	1.0062e-10	4.16443e-09	14.0295
LCP1	-1.82503	5.77324	-6.95097	1.03088e-10	4.2579e-09	14.0059
SMYD5	0.636185	5.34065	6.94893	1.04221e-10	4.2944e-09	13.9953
CPNE2	-1.00288	6.44079	-6.94862	1.04395e-10	4.2944e-09	13.9937
SLC37A1	-1.12255	4.49829	-6.945	1.06441e-10	4.36966e-09	13.9749
DNAJA4	-1.20541	6.22721	-6.94445	1.06758e-10	4.37385e-09	13.972
PRDM2	-0.644896	6.20483	-6.94406	1.06979e-10	4.37405e-09	13.97
RIT1	-0.616361	5.01195	-6.93621	1.11577e-10	4.55243e-09	13.9292
C1orf50	-0.606689	3.72496	-6.93586	1.1179e-10	4.55243e-09	13.9273
MIER1	-0.750824	5.11361	-6.93391	1.1296e-10	4.59085e-09	13.9172
LACTB	-0.733531	3.82837	-6.93249	1.13826e-10	4.6168e-09	13.9098
LINC00479	2.51602	-5.29991	6.9317	1.14305e-10	4.62698e-09	13.9057
FKBP10	1.5043	6.36559	6.93005	1.15321e-10	4.65879e-09	13.8971
WIPF2	-0.621696	5.75371	-6.92732	1.17018e-10	4.71795e-09	13.883
DLX6	3.29667	-0.855486	6.92684	1.1732e-10	4.72072e-09	13.8805
EXOSC2	0.698219	5.28163	6.92518	1.18368e-10	4.75347e-09	13.8718
DDX39A	0.750147	6.92937	6.92269	1.19956e-10	4.80772e-09	13.8589
NLRC4	-0.899919	2.22596	-6.91859	1.22623e-10	4.8991e-09	13.8376
DLX5	2.86266	0.804613	6.91844	1.22719e-10	4.8991e-09	13.8368
GCGR	-4.04674	3.76962	-6.91649	1.24007e-10	4.94077e-09	13.8267
ARHGAP36	-4.14816	6.07147	-6.91578	1.24476e-10	4.94975e-09	13.823
HCG11	-1.5048	4.39352	-6.91035	1.28146e-10	5.08573e-09	13.7948
KCNF1	2.29754	0.552528	6.9048	1.32011e-10	5.22888e-09	13.766
MIR181A2HG	2.22927	-1.49484	6.90038	1.35168e-10	5.3435e-09	13.7431
TEKT2	-1.69824	2.36496	-6.89573	1.38566e-10	5.4658e-09	13.719
KLHL25	0.819405	3.90636	6.89541	1.38801e-10	5.4658e-09	13.7173
CLU	-1.81728	8.68499	-6.89468	1.39345e-10	5.47657e-09	13.7135
FBXO42	-0.580904	5.07551	-6.88719	1.45036e-10	5.68923e-09	13.6747
RIPK1	-0.662227	5.12943	-6.88493	1.46799e-10	5.74726e-09	13.663
HP1BP3	-0.599553	7.84582	-6.8797	1.50953e-10	5.89852e-09	13.6359
LY75	-1.8848	1.33923	-6.87872	1.51741e-10	5.91789e-09	13.6309
OSCP1	-0.822457	2.72596	-6.87664	1.53441e-10	5.97271e-09	13.6201
TERC	2.0328	-2.47097	6.87417	1.55473e-10	6.04023e-09	13.6073
ARHGEF33	-0.85054	1.22077	-6.87203	1.57259e-10	6.09792e-09	13.5962
DNER	-1.77376	5.59001	-6.87001	1.58968e-10	6.15241e-09	13.5857
LRRC36	-1.47386	1.39171	-6.86889	1.59915e-10	6.1773e-09	13.58
FABP3	-1.83756	3.85773	-6.86284	1.65161e-10	6.36781e-09	13.5487
NACAD	-0.776281	7.42849	-6.85871	1.68834e-10	6.49693e-09	13.5273
C11orf80	-0.80535	4.89032	-6.85836	1.69151e-10	6.49693e-09	13.5255
FNDC9	-2.28535	2.41959	-6.85409	1.73045e-10	6.63392e-09	13.5034
OSBPL9	-0.600203	6.57107	-6.85335	1.7373e-10	6.63725e-09	13.4996
TMEM51	-1.033	3.88371	-6.85303	1.74024e-10	6.63725e-09	13.498
GUF1	0.833383	5.10241	6.85293	1.74113e-10	6.63725e-09	13.4975
RPS5	1.00533	9.36504	6.85072	1.76175e-10	6.70323e-09	13.486
RER1	-0.515507	6.48725	-6.85016	1.76704e-10	6.7108e-09	13.4831
CLNS1A	0.927892	5.91932	6.84972	1.77119e-10	6.71397e-09	13.4809
ALS2CR12	-1.33601	0.0484453	-6.84909	1.77711e-10	6.72384e-09	13.4776
RAB41	-0.801211	0.613021	-6.84427	1.82338e-10	6.88606e-09	13.4527
ZNF114	2.60646	-1.85086	6.84381	1.82785e-10	6.89011e-09	13.4503
RPS9	0.954637	9.44674	6.84226	1.84298e-10	6.93426e-09	13.4423
IQCG	-0.934447	3.21951	-6.84115	1.85394e-10	6.96257e-09	13.4366
SLAMF8	-1.38362	3.21472	-6.84004	1.86486e-10	6.99063e-09	13.4309
DOCK3	-2.07466	4.56288	-6.83764	1.8889e-10	7.06769e-09	13.4184
RPS6	1.05798	10.3323	6.83507	1.91483e-10	7.14722e-09	13.4052
EIF2D	0.480273	5.08506	6.83442	1.92155e-10	7.14722e-09	13.4018
WDR44	-0.562505	4.25608	-6.8344	1.92172e-10	7.14722e-09	13.4017
MTHFD2L	0.721575	2.60598	6.83415	1.92425e-10	7.14722e-09	13.4005
SYNGR1	-0.85527	7.44747	-6.833	1.93611e-10	7.17812e-09	13.3945
SGPL1	-0.694865	6.94355	-6.83019	1.96527e-10	7.27292e-09	13.38
LRRN1	3.47451	1.18421	6.82972	1.97014e-10	7.27766e-09	13.3776
IPO13	-0.654645	6.14244	-6.82908	1.97687e-10	7.28927e-09	13.3743
LYZ	-2.08635	5.58486	-6.82796	1.98869e-10	7.31953e-09	13.3685
AHI1	-1.06079	5.91551	-6.82756	1.99297e-10	7.322e-09	13.3664
TMEM59	-0.697314	7.25911	-6.82691	1.99984e-10	7.32266e-09	13.3631
KCNK13	-1.68073	-0.0358836	-6.82686	2.00037e-10	7.32266e-09	13.3628
RAB3D	-0.722375	4.81183	-6.82585	2.01114e-10	7.3488e-09	13.3576
PGAP2	0.709396	4.80654	6.82102	2.06346e-10	7.51583e-09	13.3327
PSAT1	1.19958	4.42533	6.82095	2.06426e-10	7.51583e-09	13.3323
ECSIT	0.690313	6.11501	6.81997	2.07501e-10	7.54145e-09	13.3273
LURAP1	-1.5267	-0.38117	-6.81661	2.11239e-10	7.66357e-09	13.31
SLC1A6	3.73796	-4.68803	6.81383	2.14383e-10	7.76373e-09	13.2957
KCTD7	-0.671958	5.84802	-6.8124	2.16015e-10	7.80889e-09	13.2883
RPL7	0.980448	9.92694	6.81111	2.175e-10	7.84857e-09	13.2817
PLA2G2D	-4.16846	1.5335	-6.81077	2.17893e-10	7.84879e-09	13.2799
GNB1	-0.6281	9.2637	-6.8102	2.18556e-10	7.8587e-09	13.277
GUCA1A	-2.55866	1.78447	-6.80569	2.23858e-10	8.03513e-09	13.2537
KCNS2	3.0586	-3.16325	6.80313	2.26919e-10	8.13058e-09	13.2406
PTPRA	-0.549241	7.23377	-6.80151	2.2887e-10	8.18605e-09	13.2323
RPL10A	0.878044	9.37209	6.79855	2.32506e-10	8.29443e-09	13.217
RPS28	0.911572	8.07102	6.79837	2.32718e-10	8.29443e-09	13.2161
THG1L	0.800282	3.404	6.79524	2.3662e-10	8.41871e-09	13.2
DNAAF1	-1.93533	-0.246155	-6.79111	2.41863e-10	8.59014e-09	13.1787
SNRPF	0.905796	5.66763	6.78982	2.43527e-10	8.63415e-09	13.1721
WDR43	0.919891	5.46962	6.78081	2.55436e-10	9.04056e-09	13.1258
DHX33	0.735756	5.48001	6.77769	2.59703e-10	9.17556e-09	13.1097
PSMB2	-0.501314	6.81449	-6.77614	2.61834e-10	9.23477e-09	13.1018
ZYG11B	-0.637207	6.02834	-6.76912	2.71756e-10	9.56045e-09	13.0657
XCL2	-2.10013	-1.38875	-6.76894	2.72011e-10	9.56045e-09	13.0648
ZBTB46	-0.900435	5.3417	-6.76628	2.7587e-10	9.6793e-09	13.0511
PCDH1	-0.876263	6.06021	-6.76104	2.83634e-10	9.93454e-09	13.0242
SPAG6	-2.49442	1.75834	-6.75923	2.86362e-10	9.9939e-09	13.015
MED12	0.58396	6.20028	6.75918	2.86441e-10	9.9939e-09	13.0147
ARHGAP22	-1.42535	4.02383	-6.75894	2.86807e-10	9.9939e-09	13.0134
C1orf122	-0.809763	5.18497	-6.7579	2.88395e-10	1.00209e-08	13.0081
RGS4	-1.49298	7.85835	-6.75778	2.88571e-10	1.00209e-08	13.0075
GALNT14	1.94615	1.61107	6.75709	2.89635e-10	1.00359e-08	13.0039
CTNNBIP1	-0.694988	5.74002	-6.75685	2.89991e-10	1.00359e-08	13.0027
RPS3A	1.06488	10.3303	6.75537	2.92282e-10	1.00979e-08	12.9951
SIX2	3.15861	-0.0609969	6.75437	2.93826e-10	1.01328e-08	12.99
TMEM132C	-2.95036	5.91114	-6.75407	2.9429e-10	1.01328e-08	12.9885
IDH2	0.869522	6.56959	6.7528	2.96283e-10	1.01841e-08	12.9819
STAT1	-1.12099	6.6143	-6.75047	2.99955e-10	1.02929e-08	12.97
SNX11	-0.623226	5.14097	-6.74975	3.01097e-10	1.03146e-08	12.9663
RIMS3	-1.35987	7.69563	-6.74696	3.05572e-10	1.04503e-08	12.952
PNMAL1	-0.864666	6.53836	-6.74648	3.06349e-10	1.04535e-08	12.9495
SH3YL1	0.71314	5.54111	6.74626	3.06699e-10	1.04535e-08	12.9484
RGS20	1.89598	-0.869479	6.74194	3.13791e-10	1.06773e-08	12.9263
SERINC1	-0.850903	8.49252	-6.73344	3.28201e-10	1.11382e-08	12.8827
PGM2L1	-1.32552	5.93469	-6.7333	3.28435e-10	1.11382e-08	12.8821
P2RY13	-2.07368	1.49596	-6.72992	3.34349e-10	1.13199e-08	12.8648
LAS1L	0.741623	6.16664	6.72704	3.39486e-10	1.14746e-08	12.85
RD3	-2.61079	0.11661	-6.72552	3.42217e-10	1.15477e-08	12.8422
WIZ	0.506822	6.70123	6.72389	3.45167e-10	1.16279e-08	12.8339
RAB6B	-0.905131	7.78505	-6.71988	3.52553e-10	1.1857e-08	12.8134
RBFA	0.618769	5.3158	6.71899	3.54221e-10	1.18934e-08	12.8088
SELV	3.06714	-3.81437	6.71841	3.55301e-10	1.19099e-08	12.8058
KCNH6	-1.67848	2.89685	-6.71781	3.56424e-10	1.19278e-08	12.8028
KTN1-AS1	0.970371	-0.268875	6.71451	3.62677e-10	1.21171e-08	12.7859
VPS13D	-0.746196	6.01592	-6.71214	3.67256e-10	1.22499e-08	12.7738
SETMAR	0.7158	4.04342	6.71169	3.68128e-10	1.22588e-08	12.7715
RPL37A	0.996924	10.0059	6.7083	3.74763e-10	1.24593e-08	12.7541
ZNF581	0.778382	4.72858	6.7073	3.76735e-10	1.25044e-08	12.7491
MRPL3	0.67818	5.91716	6.70552	3.80287e-10	1.26017e-08	12.74
RPL12	1.0149	9.38186	6.70412	3.83105e-10	1.26743e-08	12.7328
IPO5	0.68354	7.77033	6.7015	3.88444e-10	1.283e-08	12.7194
ELOVL4	-0.887612	4.53369	-6.70101	3.89443e-10	1.28421e-08	12.7169
SLC9A6	-0.808572	5.68406	-6.69859	3.94428e-10	1.29854e-08	12.7046
EXOSC5	0.966538	4.60496	6.69638	3.99065e-10	1.30964e-08	12.6932
GNPNAT1	0.644337	4.61243	6.69626	3.99308e-10	1.30964e-08	12.6927
TFAP2D	2.4253	-5.37611	6.69606	3.99738e-10	1.30964e-08	12.6916
SDCCAG3	0.5851	5.66768	6.69381	4.04503e-10	1.32312e-08	12.6801
IQCC	-0.760578	3.45023	-6.69221	4.07911e-10	1.33212e-08	12.672
TMEM234	-0.784252	2.9896	-6.68633	4.20751e-10	1.36896e-08	12.642
HEPACAM2	-2.90126	-1.88969	-6.6862	4.21037e-10	1.36896e-08	12.6413
SOWAHA	-2.70931	1.61419	-6.68611	4.21219e-10	1.36896e-08	12.6409
ARHGEF3	-1.42864	4.57641	-6.68471	4.24341e-10	1.37597e-08	12.6337
RIMKLA	-0.865804	3.99687	-6.68447	4.24891e-10	1.37597e-08	12.6325
HOXC4	-1.75221	5.21519	-6.68423	4.25412e-10	1.37597e-08	12.6313
CELF6	-0.957111	5.8143	-6.68335	4.27394e-10	1.38018e-08	12.6268
DHODH	0.634489	3.46308	6.68068	4.3343e-10	1.39745e-08	12.6132
PCLO	-1.22277	6.26111	-6.6798	4.35441e-10	1.40171e-08	12.6087
LPCAT3	-0.501513	5.31388	-6.67243	4.52667e-10	1.45485e-08	12.5711
SF3A2	0.846116	7.22472	6.66978	4.59003e-10	1.47288e-08	12.5576
RPS23	0.996223	9.69921	6.66799	4.63358e-10	1.4845e-08	12.5485
ANKFN1	-3.00916	-0.15485	-6.66555	4.69331e-10	1.50127e-08	12.5361
CCT4	0.740325	7.70765	6.66319	4.75197e-10	1.51764e-08	12.524
ZBTB7C	-1.52804	3.76074	-6.65722	4.90317e-10	1.56346e-08	12.4937
METTL21A	0.672928	3.47553	6.65666	4.91777e-10	1.56566e-08	12.4908
RTBDN	-1.41821	2.02134	-6.65543	4.94948e-10	1.57328e-08	12.4846
CPLX3	2.50861	1.14945	6.65496	4.96171e-10	1.5747e-08	12.4822
KDELC1	0.831749	3.94221	6.65002	5.09222e-10	1.61314e-08	12.457
MVK	-0.713304	4.6546	-6.64977	5.09873e-10	1.61314e-08	12.4558
DET1	0.629751	3.52549	6.64898	5.12009e-10	1.61737e-08	12.4517
PEX14	-0.634422	4.81381	-6.64468	5.23676e-10	1.64932e-08	12.4299
GNB5	-0.638787	5.48074	-6.64466	5.23749e-10	1.64932e-08	12.4297
METTL1	0.879674	3.55188	6.64416	5.25122e-10	1.65108e-08	12.4272
TGIF2	1.34803	3.66687	6.63925	5.38817e-10	1.69152e-08	12.4023
ATP6V0B	-0.791516	7.36845	-6.63831	5.41476e-10	1.69724e-08	12.3975
CLN6	0.677346	5.71953	6.63619	5.47532e-10	1.71357e-08	12.3867
SLC29A2	1.31675	3.63933	6.63575	5.48816e-10	1.71494e-08	12.3844
DPP7	1.10198	6.75244	6.63347	5.55396e-10	1.73284e-08	12.3729
RPL4	0.937153	10.8342	6.63226	5.58926e-10	1.74117e-08	12.3668
NLE1	0.73418	4.77502	6.63039	5.64435e-10	1.75563e-08	12.3573
COL4A3BP	-0.591223	5.59674	-6.62912	5.68221e-10	1.76471e-08	12.3508
ZCCHC16	-3.04845	-3.43973	-6.6278	5.72157e-10	1.77421e-08	12.3441
RPS24	1.13751	10.1232	6.62709	5.74279e-10	1.77807e-08	12.3405
GRPEL1	0.7116	4.67768	6.62585	5.78016e-10	1.78692e-08	12.3342
RPIA	0.565893	4.87026	6.62112	5.92543e-10	1.82904e-08	12.3102
ANKRD18B	3.49162	-1.19299	6.61556	6.10025e-10	1.88014e-08	12.282
PAFAH2	-0.788896	3.51629	-6.61024	6.27277e-10	1.93038e-08	12.255
ATP6V1A	-0.713194	6.82115	-6.60844	6.3319e-10	1.94562e-08	12.2459
MNX1	2.63647	-3.63186	6.60612	6.40928e-10	1.96642e-08	12.2341
ZCCHC12	-1.37248	5.73244	-6.60329	6.50501e-10	1.99277e-08	12.2198
SLC41A2	-0.936894	3.08901	-6.59676	6.7307e-10	2.05673e-08	12.1867
CYBB	-1.48221	4.93873	-6.59667	6.73408e-10	2.05673e-08	12.1862
MYO5A	-0.744613	6.64499	-6.59433	6.81705e-10	2.07894e-08	12.1744
2016-09-04	-1.13526	5.5568	-6.58676	7.092e-10	2.15955e-08	12.1361
ZMYND12	-1.25336	0.0208274	-6.58584	7.12622e-10	2.16671e-08	12.1314
HNRNPA1	0.849123	5.34357	6.58472	7.16799e-10	2.17615e-08	12.1257
JPH1	2.55736	1.68281	6.5821	7.26669e-10	2.20282e-08	12.1125
KRI1	0.532978	5.36389	6.58101	7.30815e-10	2.21208e-08	12.107
CDCA7L	1.81659	2.38087	6.57987	7.35186e-10	2.22199e-08	12.1012
RPL9	1.09384	9.71135	6.57594	7.5043e-10	2.26469e-08	12.0813
KRT32	-2.43181	-2.86547	-6.57539	7.52583e-10	2.26781e-08	12.0785
FAM177A1	-0.666405	5.15989	-6.57352	7.59934e-10	2.28639e-08	12.0691
CHEK1	1.35491	4.02523	6.57325	7.61003e-10	2.28639e-08	12.0678
ME3	0.964403	5.25196	6.57244	7.64244e-10	2.29273e-08	12.0636
RIOK3	-0.58212	6.40963	-6.56915	7.77479e-10	2.32899e-08	12.047
DAZAP1	0.61156	6.96483	6.56862	7.79637e-10	2.33201e-08	12.0443
MTHFD1L	0.871148	4.98332	6.56578	7.91243e-10	2.36219e-08	12.03
MCM3AP	0.495336	6.85901	6.56559	7.92057e-10	2.36219e-08	12.029
SCARNA14	1.51379	-5.80681	6.56051	8.13292e-10	2.42196e-08	12.0034
C1orf110	-2.38835	-3.32588	-6.55827	8.2285e-10	2.44683e-08	11.9921
NEGR1	-1.7626	4.64882	-6.55773	8.2519e-10	2.4502e-08	11.9893
CRISP2	2.93488	-4.59461	6.55643	8.30764e-10	2.46314e-08	11.9828
GPSM1	0.685968	7.28293	6.55436	8.39803e-10	2.48631e-08	11.9723
LDOC1	0.853139	5.70938	6.5522	8.49277e-10	2.51069e-08	11.9615
HLA-DQA1	-2.12378	4.9143	-6.55177	8.51224e-10	2.51278e-08	11.9592
POLR1E	0.784371	4.66846	6.55026	8.57913e-10	2.52885e-08	11.9517
FAM43B	2.84406	0.592824	6.54954	8.61161e-10	2.53474e-08	11.948
CCDC7	-0.869255	2.0627	-6.54809	8.67689e-10	2.55025e-08	11.9407
INVS	0.5833	3.86012	6.54537	8.80042e-10	2.58282e-08	11.927
RPL41	0.921821	8.58084	6.54162	8.97411e-10	2.62998e-08	11.9081
SNORA40	1.13302	0.720602	6.54104	9.00118e-10	2.63411e-08	11.9052
ACSF3	1.33775	3.27407	6.53436	9.31944e-10	2.72332e-08	11.8715
CYP27B1	1.19974	1.35569	6.52969	9.54884e-10	2.78634e-08	11.8479
PROKR1	-2.50797	-0.701526	-6.52833	9.61641e-10	2.80202e-08	11.8411
ERCC2	0.679767	4.47261	6.52469	9.80032e-10	2.85151e-08	11.8228
WDTC1	-0.571486	6.12387	-6.52373	9.84929e-10	2.86166e-08	11.8179
KIAA1107	-1.07161	4.18236	-6.52151	9.96328e-10	2.88774e-08	11.8068
FBXO44	-0.884489	5.90777	-6.52123	9.97822e-10	2.88774e-08	11.8054
CAD	0.741966	6.52515	6.52116	9.98179e-10	2.88774e-08	11.805
PFAS	0.869026	5.86106	6.52064	1.00087e-09	2.89139e-08	11.8024
NAV3	-1.95738	3.49103	-6.51975	1.00549e-09	2.90063e-08	11.7979
GOLIM4	1.05306	4.32046	6.51883	1.0103e-09	2.91034e-08	11.7933
WDR12	0.695785	4.41267	6.51591	1.02579e-09	2.95078e-08	11.7786
PHTF1	-0.676449	4.93703	-6.51464	1.03257e-09	2.96607e-08	11.7722
RSG1	-0.973487	1.71974	-6.51262	1.04344e-09	2.99305e-08	11.7621
ZNF502	0.891122	3.67385	6.50869	1.06498e-09	3.05054e-08	11.7423
ADIPOR1	-0.509531	6.57484	-6.50832	1.06699e-09	3.05197e-08	11.7405
FAM53A	1.28706	0.273036	6.50799	1.06885e-09	3.053e-08	11.7388
IGSF6	-1.19156	2.60322	-6.50711	1.07371e-09	3.06257e-08	11.7344
CHRNA5	-1.29229	4.93966	-6.50583	1.08089e-09	3.07871e-08	11.7279
LRP5	0.803755	5.88654	6.49545	1.14069e-09	3.2445e-08	11.6758
HBQ1	1.5558	-0.185873	6.49383	1.15031e-09	3.26727e-08	11.6676
MSANTD2	0.854119	4.36213	6.49127	1.1657e-09	3.30635e-08	11.6548
SFN	-1.3667	-0.331859	-6.49052	1.17025e-09	3.31462e-08	11.651
EIF3L	0.792969	9.10577	6.48758	1.18819e-09	3.36073e-08	11.6363
PCGF3	0.641793	7.03472	6.48568	1.19995e-09	3.38928e-08	11.6267
TMEM200C	-2.4811	-0.422822	-6.48383	1.21149e-09	3.41711e-08	11.6175
CD9	-1.55823	6.44909	-6.48354	1.21331e-09	3.41749e-08	11.616
SLC12A1	-1.8874	-0.391821	-6.47877	1.2437e-09	3.49822e-08	11.5921
TRAPPC3	-0.532924	5.30868	-6.47776	1.25019e-09	3.51162e-08	11.587
ASPRV1	-0.949963	2.50232	-6.47582	1.26287e-09	3.54231e-08	11.5773
GNG3	-1.17014	6.76887	-6.47547	1.26511e-09	3.5437e-08	11.5755
WNT4	-1.90444	3.35858	-6.47505	1.26788e-09	3.54657e-08	11.5734
CD4	-1.42493	5.27542	-6.47255	1.28439e-09	3.5878e-08	11.5609
RPL15	0.806158	9.77948	6.46581	1.32996e-09	3.70999e-08	11.5271
CHRNB4	-1.50564	5.15371	-6.46456	1.33862e-09	3.72901e-08	11.5209
PCDH20	-2.42427	2.75823	-6.46292	1.35001e-09	3.75559e-08	11.5127
TMEM161A	0.528556	4.68849	6.46218	1.3552e-09	3.76329e-08	11.5089
CABLES1	0.885477	4.15829	6.462	1.35649e-09	3.76329e-08	11.508
TMEM218	0.643688	4.34169	6.46114	1.36252e-09	3.77486e-08	11.5037
LINC00112	1.39362	-6.20315	6.45985	1.37162e-09	3.79487e-08	11.4973
CALN1	3.4719	0.951003	6.45723	1.39035e-09	3.84145e-08	11.4842
CMAS	-0.57145	5.71847	-6.45629	1.39709e-09	3.85476e-08	11.4795
APOBEC3H	-2.018	-1.03889	-6.45603	1.39897e-09	3.85476e-08	11.4782
PTGFRN	0.915843	5.31453	6.454	1.41377e-09	3.88841e-08	11.468
HIST3H2A	1.08141	4.38671	6.45383	1.41501e-09	3.88841e-08	11.4671
RPS17	1.13179	3.56021	6.4532	1.41957e-09	3.89565e-08	11.464
RPL28	0.841684	9.29516	6.45275	1.4229e-09	3.89951e-08	11.4618
EIF4EBP1	1.10399	5.70211	6.45035	1.44064e-09	3.9428e-08	11.4498
FBXO46	0.641288	4.44099	6.44981	1.44468e-09	3.94853e-08	11.447
GPR55	-2.13608	-1.41965	-6.44778	1.45989e-09	3.98473e-08	11.4369
KIF1B	-0.817753	7.97874	-6.44533	1.47852e-09	4.0275e-08	11.4246
SIX4	2.27577	-1.06152	6.4452	1.47953e-09	4.0275e-08	11.424
ALG3	0.697154	4.83831	6.44378	1.49041e-09	4.05168e-08	11.4169
DPYS	-2.46433	-1.07066	-6.44038	1.51682e-09	4.11794e-08	11.3999
TRMT61B	0.723061	3.87641	6.43974	1.52186e-09	4.1261e-08	11.3967
SCARNA11	1.80344	-5.53371	6.43769	1.53798e-09	4.16425e-08	11.3865
UBD	-3.09406	2.51838	-6.43366	1.57036e-09	4.24625e-08	11.3663
ATIC	0.832723	6.15339	6.42868	1.61125e-09	4.35101e-08	11.3414
TFAMP1	-2.56689	2.52246	-6.42678	1.62703e-09	4.3878e-08	11.332
PPA2	0.696239	4.56459	6.4241	1.6497e-09	4.44301e-08	11.3186
ST6GALNAC4	0.717442	4.0823	6.42263	1.66224e-09	4.47086e-08	11.3113
RPL39	1.25489	8.13229	6.41938	1.69035e-09	4.54043e-08	11.295
EIF4B	0.68425	8.89287	6.41606	1.7195e-09	4.61262e-08	11.2785
C6orf222	-3.0949	-1.89893	-6.41001	1.77397e-09	4.75246e-08	11.2483
RPL23	0.950898	9.79081	6.40681	1.80347e-09	4.82511e-08	11.2323
ERC1	-0.635551	6.5613	-6.40652	1.80616e-09	4.82595e-08	11.2309
CNTNAP2	-1.60886	7.50484	-6.40569	1.81387e-09	4.84017e-08	11.2268
CD160	-0.968135	2.59454	-6.40027	1.86521e-09	4.97062e-08	11.1998
RNF122	0.753129	4.88433	6.39927	1.87478e-09	4.98958e-08	11.1948
DHX15	0.52975	6.82596	6.39786	1.88847e-09	5.01461e-08	11.1878
MATN1	-1.24095	-0.137401	-6.39776	1.88942e-09	5.01461e-08	11.1873
ADAMTS14	1.50041	2.65247	6.39754	1.89161e-09	5.01461e-08	11.1862
MFSD10	0.744655	7.10187	6.39467	1.91969e-09	5.08119e-08	11.1719
USP48	-0.494926	6.27073	-6.39446	1.92173e-09	5.08119e-08	11.1709
SLC6A13	-1.4943	-0.0636018	-6.39204	1.94584e-09	5.13824e-08	11.1588
C6orf165	-1.15261	-0.102363	-6.39014	1.96491e-09	5.18185e-08	11.1494
RANBP1	0.823219	6.91497	6.38834	1.98321e-09	5.2233e-08	11.1404
RBFOX1	-1.88393	4.96576	-6.38564	2.01093e-09	5.28944e-08	11.127
NACA	0.840054	9.5393	6.38301	2.03833e-09	5.35458e-08	11.1139
PRODH	-1.41639	3.22331	-6.38212	2.0477e-09	5.37223e-08	11.1094
PITPNM1	-1.15133	6.04357	-6.37755	2.09634e-09	5.49274e-08	11.0867
LMBRD1	-0.805214	5.6157	-6.37651	2.10749e-09	5.51482e-08	11.0816
ACSL6	-1.22369	4.07857	-6.37547	2.11877e-09	5.53389e-08	11.0764
FCRL6	-1.9666	-0.526489	-6.37534	2.12023e-09	5.53389e-08	11.0758
FBXO3	-0.557886	5.28518	-6.37467	2.12749e-09	5.54571e-08	11.0724
MTOR	-0.630523	6.37535	-6.37362	2.13898e-09	5.56848e-08	11.0672
USP32	-0.653739	6.5714	-6.372	2.15695e-09	5.60125e-08	11.0591
SCUBE1	-2.09226	4.01645	-6.37198	2.15709e-09	5.60125e-08	11.0591
FAIM2	-1.05842	7.67669	-6.3716	2.16128e-09	5.60497e-08	11.0572
SIGMAR1	0.677736	6.14401	6.36912	2.18901e-09	5.6678e-08	11.0449
EXPH5	1.71162	-0.915162	6.36894	2.1911e-09	5.6678e-08	11.0439
GABARAPL1	-1.5411	6.19374	-6.36692	2.21392e-09	5.70704e-08	11.0339
SNRPD2	0.789746	7.12143	6.36672	2.21616e-09	5.70704e-08	11.0329
EPS15	-0.77888	6.05129	-6.36662	2.21732e-09	5.70704e-08	11.0324
HIPK3	-0.915075	5.80227	-6.3666	2.21753e-09	5.70704e-08	11.0323
RAMP2	0.696478	5.0504	6.36495	2.23637e-09	5.74824e-08	11.0242
SERPINB8	-1.14296	2.98486	-6.35782	2.31974e-09	5.95498e-08	10.9887
TUBB2A	-1.11486	7.82102	-6.35391	2.3667e-09	6.06784e-08	10.9694
NT5DC3	1.13436	3.58522	6.35285	2.37952e-09	6.09302e-08	10.9641
SERPINA12	-3.03604	-2.23095	-6.35215	2.38813e-09	6.10735e-08	10.9606
U2AF2	0.406792	7.71912	6.34921	2.42437e-09	6.19051e-08	10.9461
RPL35A	0.94756	8.9816	6.34902	2.42675e-09	6.19051e-08	10.9451
AP4B1	0.556949	4.95912	6.34641	2.45938e-09	6.26586e-08	10.9322
LRPPRC	0.684712	7.59568	6.34538	2.47243e-09	6.29121e-08	10.9271
CCDC94	0.578665	4.67864	6.34419	2.48753e-09	6.3217e-08	10.9212
SEZ6L	-1.77669	7.46842	-6.34303	2.50238e-09	6.35147e-08	10.9154
XKR4	-2.3879	0.0757611	-6.33342	2.62852e-09	6.66331e-08	10.8678
ALPK3	-1.54977	5.22376	-6.33213	2.64598e-09	6.69918e-08	10.8614
PIPOX	-1.50182	2.37244	-6.32359	2.76414e-09	6.98961e-08	10.8192
CD163L1	-1.33357	4.26152	-6.32204	2.78615e-09	7.0365e-08	10.8115
METAP1	0.515376	5.43927	6.32041	2.80934e-09	7.08625e-08	10.8035
SYNGR2	-0.846449	5.79917	-6.3182	2.8413e-09	7.15796e-08	10.7925
CA5BP1	0.722403	3.71584	6.31704	2.85825e-09	7.19171e-08	10.7868
KIF7	0.829903	4.47877	6.31565	2.87857e-09	7.22682e-08	10.7799
FYB	-1.77112	3.5963	-6.3156	2.87932e-09	7.22682e-08	10.7797
KDM4D	0.885524	1.10028	6.31508	2.88696e-09	7.23704e-08	10.7771
TOMM40	0.557575	5.88604	6.31407	2.9019e-09	7.26549e-08	10.7721
BOD1	0.584893	6.3592	6.31126	2.9438e-09	7.3613e-08	10.7583
CARM1	0.408822	6.44043	6.30447	3.04771e-09	7.60612e-08	10.7247
FBXL19-AS1	1.16481	2.17869	6.30438	3.0492e-09	7.60612e-08	10.7242
RHOBTB3	0.918865	6.12987	6.29981	3.12116e-09	7.77607e-08	10.7017
SDHB	-0.572079	5.41634	-6.29791	3.15145e-09	7.8419e-08	10.6923
CRABP1	4.04062	0.0144278	6.29754	3.15739e-09	7.84705e-08	10.6905
RPS13	1.00654	9.06823	6.29433	3.2096e-09	7.96483e-08	10.6747
DYM	0.604974	5.25132	6.29414	3.21264e-09	7.96483e-08	10.6737
NFRKB	0.626066	5.27777	6.29251	3.23958e-09	8.02181e-08	10.6657
PTRHD1	0.797186	3.95183	6.29173	3.25235e-09	8.04361e-08	10.6619
ST6GAL2	2.56005	1.04903	6.2905	3.27285e-09	8.08446e-08	10.6558
NRD1	-0.407152	7.1387	-6.28968	3.28658e-09	8.1085e-08	10.6517
PTER	-1.8177	3.58674	-6.28897	3.29854e-09	8.11892e-08	10.6482
ZNF396	-1.02661	0.861989	-6.28895	3.29881e-09	8.11892e-08	10.6481
MAPK8IP1	-0.824801	7.67673	-6.2884	3.30803e-09	8.13175e-08	10.6454
EARS2	0.631046	4.68783	6.28631	3.34357e-09	8.20915e-08	10.6351
MTAP	0.751057	4.69852	6.28311	3.39848e-09	8.33387e-08	10.6194
TIFAB	-2.61651	-1.26848	-6.28267	3.40607e-09	8.34115e-08	10.6172
SERPINA9	-3.08328	-1.9491	-6.28247	3.40967e-09	8.34115e-08	10.6162
EHF	-2.86983	-1.638	-6.27726	3.50126e-09	8.55488e-08	10.5905
PTBP1	0.620045	7.58769	6.27357	3.56776e-09	8.70123e-08	10.5723
FAM73A	-0.782997	4.64074	-6.27346	3.56974e-09	8.70123e-08	10.5718
SNHG6	0.99515	6.06903	6.26764	3.67708e-09	8.95213e-08	10.5432
EIF3D	0.569373	7.54775	6.26657	3.69709e-09	8.97999e-08	10.5379
METAP1D	0.813627	2.84412	6.26656	3.69738e-09	8.97999e-08	10.5378
HAUS7	0.566622	4.97347	6.26565	3.71454e-09	9.01054e-08	10.5334
MFSD1	-0.655495	5.8896	-6.26542	3.71885e-09	9.01054e-08	10.5322
NACA2	1.02349	-0.90436	6.26228	3.77869e-09	9.14462e-08	10.5168
TNF	-2.05732	1.21107	-6.25977	3.82734e-09	9.2513e-08	10.5044
ARL4D	-1.09679	3.93628	-6.2522	3.97734e-09	9.60244e-08	10.4673
IARS	0.497166	7.05273	6.25102	4.00139e-09	9.64901e-08	10.4614
TH	-2.26917	8.6221	-6.24939	4.03469e-09	9.71777e-08	10.4534
TMPRSS13	1.34043	-0.166828	6.24812	4.06074e-09	9.76889e-08	10.4472
SLC12A6	-0.607435	5.53756	-6.24613	4.10205e-09	9.85659e-08	10.4374
CYSTM1	-1.29297	4.46529	-6.24541	4.11707e-09	9.88097e-08	10.4339
TMEM130	-1.18199	7.26234	-6.2434	4.15926e-09	9.97043e-08	10.424
DNAJB9	-0.70601	5.24634	-6.24125	4.20497e-09	1.00681e-07	10.4134
LILRB4	-1.69822	3.71449	-6.23785	4.27809e-09	1.02311e-07	10.3968
METTL8	0.641291	3.85068	6.23503	4.33989e-09	1.03667e-07	10.3829
SNCAIP	1.47693	2.0705	6.22795	4.49855e-09	1.0733e-07	10.3482
C4orf46	1.06296	4.43707	6.2274	4.51103e-09	1.07501e-07	10.3455
CCNI	0.700747	8.52214	6.22608	4.54129e-09	1.08095e-07	10.3391
B3GALNT2	0.651919	4.41812	6.22543	4.5563e-09	1.08231e-07	10.3359
NCLN	0.556047	6.25369	6.22538	4.55764e-09	1.08231e-07	10.3356
SYT2	-2.01524	4.08359	-6.22488	4.5691e-09	1.08376e-07	10.3332
PIGK	-0.642554	4.84348	-6.22337	4.60427e-09	1.09082e-07	10.3257
GPT2	0.636419	5.78268	6.22242	4.62654e-09	1.09482e-07	10.3211
FOXRED1	0.6188	5.41529	6.22002	4.68311e-09	1.10692e-07	10.3093
ZC2HC1C	-0.705461	1.76522	-6.21859	4.71702e-09	1.11363e-07	10.3024
U2AF1	0.63035	6.85742	6.21686	4.75857e-09	1.12039e-07	10.2939
MIS18A	0.905174	3.86863	6.21672	4.76209e-09	1.12039e-07	10.2932
ALCAM	-1.64979	7.80737	-6.21671	4.76222e-09	1.12039e-07	10.2931
KRT81	-2.11584	-2.15335	-6.21428	4.82117e-09	1.13295e-07	10.2812
DSCR8	3.56415	-4.54283	6.21274	4.85896e-09	1.14051e-07	10.2737
ORAI2	-0.625025	6.70945	-6.21107	4.90029e-09	1.14888e-07	10.2655
GCNT3	-1.50003	-2.78293	-6.21068	4.90998e-09	1.14982e-07	10.2636
SMARCC1	0.763107	7.01753	6.20865	4.96074e-09	1.16037e-07	10.2537
ALDOC	-1.52176	5.01478	-6.20729	4.995e-09	1.16704e-07	10.247
SLC12A8	1.4579	1.51325	6.207	5.00227e-09	1.16739e-07	10.2456
RNF14	-0.576489	5.74455	-6.20466	5.0619e-09	1.17995e-07	10.2341
CROT	-0.949202	4.74427	-6.2029	5.10723e-09	1.18915e-07	10.2255
PIGV	-0.674762	3.20865	-6.2008	5.16178e-09	1.20047e-07	10.2153
CYFIP1	0.952639	6.06753	6.20046	5.1707e-09	1.20117e-07	10.2136
CD84	-1.59774	3.1168	-6.19957	5.19399e-09	1.2052e-07	10.2092
CD38	-1.73745	0.732016	-6.19688	5.26504e-09	1.22029e-07	10.1961
OLFM2	2.09252	4.39576	6.19169	5.40502e-09	1.25077e-07	10.1707
VPS4B	-0.494035	5.76794	-6.19155	5.40888e-09	1.25077e-07	10.1701
RPS20	0.874597	9.22149	6.19123	5.41773e-09	1.25138e-07	10.1685
CTXN2	-1.29584	1.63549	-6.19086	5.42776e-09	1.25227e-07	10.1667
CCDC88C	1.5098	3.70308	6.18967	5.46055e-09	1.25841e-07	10.1609
DHX37	0.614468	4.75576	6.18836	5.49691e-09	1.26535e-07	10.1545
VPS33A	-0.605316	5.37472	-6.18671	5.5429e-09	1.27449e-07	10.1464
ZNF876P	1.31325	1.40704	6.18393	5.62127e-09	1.29105e-07	10.1328
CLCN1	-1.45992	0.11065	-6.1807	5.71379e-09	1.31081e-07	10.1171
IQCA1	-1.68706	2.23991	-6.18014	5.72991e-09	1.31302e-07	10.1143
C2CD4A	-2.78871	0.966763	-6.1797	5.7428e-09	1.31449e-07	10.1122
CDC42EP4	-0.904349	7.462	-6.17897	5.76376e-09	1.3178e-07	10.1086
ZNF556	2.161	-2.84148	6.1783	5.78333e-09	1.32079e-07	10.1054
CPNE7	2.74592	3.76427	6.17695	5.82282e-09	1.32831e-07	10.0988
PLXNA4	-2.03965	5.90273	-6.17572	5.85938e-09	1.33411e-07	10.0927
FAM127C	0.484175	4.59768	6.17565	5.8614e-09	1.33411e-07	10.0924
KCNA3	-1.20644	3.90135	-6.17366	5.92057e-09	1.34607e-07	10.0827
CNGB1	-2.04155	5.96544	-6.17313	5.93633e-09	1.34686e-07	10.0801
SGK2	-1.52301	1.6756	-6.1731	5.93734e-09	1.34686e-07	10.08
RRP1B	0.675879	6.05051	6.17192	5.97283e-09	1.3534e-07	10.0742
CHODL	2.54558	0.747384	6.16501	6.18447e-09	1.39979e-07	10.0406
ZNF641	-0.674337	5.25441	-6.16441	6.20346e-09	1.40252e-07	10.0376
RPL26	0.933071	9.70007	6.1635	6.23177e-09	1.40735e-07	10.0332
STAT3	-0.874481	7.36621	-6.16241	6.26624e-09	1.41356e-07	10.0279
GNA12	-0.468621	6.56155	-6.15812	6.40313e-09	1.44284e-07	10.007
GPR37L1	-2.8092	-1.68766	-6.15702	6.43879e-09	1.44926e-07	10.0016
C2CD4B	-2.09778	2.1865	-6.15618	6.46608e-09	1.45379e-07	9.99752
CD96	-2.37606	1.14168	-6.15444	6.52291e-09	1.46495e-07	9.98906
ATXN7L2	0.706035	4.44578	6.15372	6.54664e-09	1.46865e-07	9.98555
OR2K2	-2.14442	-2.55213	-6.15223	6.59614e-09	1.47812e-07	9.97828
CCDC23	-0.84986	4.57505	-6.15131	6.62673e-09	1.48333e-07	9.97381
CRAMP1L	0.578246	6.24476	6.15009	6.6676e-09	1.49084e-07	9.96786
NUBP2	0.566832	6.12114	6.14959	6.68437e-09	1.49294e-07	9.96544
STXBP5L	-1.11522	4.2977	-6.14734	6.76066e-09	1.50832e-07	9.95447
JAGN1	0.596564	4.9671	6.14341	6.89561e-09	1.53509e-07	9.93537
PPP2R5B	-0.83217	6.58717	-6.1434	6.8958e-09	1.53509e-07	9.93535
OAZ3	-0.74775	1.58512	-6.14042	7.00024e-09	1.55663e-07	9.92082
THEG	-2.823	-2.4876	-6.14019	7.00827e-09	1.55671e-07	9.91971
NRXN2	-0.875078	7.86991	-6.13699	7.12204e-09	1.58025e-07	9.90415
FRMD5	-0.654707	5.1083	-6.13288	7.27095e-09	1.61153e-07	9.88416
TEAD4	1.4342	2.67317	6.1313	7.32888e-09	1.6226e-07	9.87649
PJA2	-0.684429	7.61178	-6.13005	7.37505e-09	1.63104e-07	9.87043
CCT8	0.647152	7.66763	6.12493	7.56727e-09	1.67172e-07	9.84557
CDK5R2	-0.831582	5.86699	-6.12414	7.59731e-09	1.67653e-07	9.84174
SFXN2	0.863642	3.05817	6.12315	7.63522e-09	1.68307e-07	9.83693
PPP1R14B	0.907747	6.56453	6.12212	7.67466e-09	1.68993e-07	9.83195
EI24	0.597203	6.39928	6.12183	7.68605e-09	1.6906e-07	9.83052
LPXN	-0.842939	3.88247	-6.12008	7.75373e-09	1.70364e-07	9.82205
GDPD4	-1.82555	-1.787	-6.11931	7.78411e-09	1.70846e-07	9.81827
YARS2	0.480841	3.67492	6.11867	7.80909e-09	1.71209e-07	9.81518
CDC42EP3	0.843047	6.38737	6.11741	7.85855e-09	1.72107e-07	9.80908
CLPP	0.565349	5.67715	6.11578	7.92326e-09	1.73337e-07	9.80116
CD274	-1.39715	1.1688	-6.11497	7.95556e-09	1.73856e-07	9.79723
ATP2B4	-1.42183	6.97833	-6.11421	7.98593e-09	1.74332e-07	9.79355
B3GNT8	-1.18651	1.74891	-6.11289	8.03882e-09	1.75298e-07	9.78717
RPL5	0.888413	10.0268	6.11236	8.06049e-09	1.75582e-07	9.78457
GRM6	1.13681	1.61671	6.11077	8.12475e-09	1.76792e-07	9.7769
GTPBP1	0.482753	6.80843	6.10494	8.36631e-09	1.81853e-07	9.7486
CLEC4E	-2.67382	-0.170171	-6.10306	8.44549e-09	1.83377e-07	9.7395
RPS21	1.10022	8.64291	6.1024	8.47318e-09	1.83782e-07	9.73633
QSOX2	0.724161	5.40423	6.10091	8.53682e-09	1.84964e-07	9.72911
NEK11	-0.976351	2.29161	-6.09895	8.62106e-09	1.8659e-07	9.71962
ABHD3	-0.743644	3.9364	-6.09678	8.71546e-09	1.88256e-07	9.7091
CDT1	1.48678	5.3352	6.09676	8.71658e-09	1.88256e-07	9.70898
RPS6KC1	-0.514277	5.37473	-6.09542	8.7753e-09	1.89322e-07	9.70249
TXNDC12	-0.52401	5.62049	-6.09484	8.80064e-09	1.89667e-07	9.69971
TP53INP2	-0.713968	6.31575	-6.09411	8.83303e-09	1.90163e-07	9.69616
KCNN2	1.03373	1.64061	6.09269	8.89605e-09	1.91317e-07	9.68929
NPPC	2.3297	-1.40358	6.08883	9.06973e-09	1.94845e-07	9.67061
UCN2	-1.81727	0.448303	-6.08425	9.2799e-09	1.9915e-07	9.64849
GPN2	-0.538513	3.71313	-6.08252	9.36098e-09	2.00651e-07	9.64009
FKBP11	0.670032	4.38781	6.08233	9.36963e-09	2.00651e-07	9.63919
SV2B	-2.23108	3.55952	-6.08028	9.46648e-09	2.02511e-07	9.62926
ZBTB48	-0.523734	4.90829	-6.07991	9.48372e-09	2.02666e-07	9.6275
KLHDC9	-1.08349	3.22755	-6.07506	9.71679e-09	2.07428e-07	9.60405
CRLS1	0.503303	5.30889	6.07325	9.8054e-09	2.09099e-07	9.59529
RPGRIP1L	0.732589	3.80688	6.07008	9.96205e-09	2.12217e-07	9.57998
ATP1A4	-1.95211	-2.69844	-6.06895	1.00181e-08	2.13187e-07	9.57456
UCN3	-3.53901	-2.05228	-6.06808	1.0062e-08	2.13896e-07	9.57034
GLIPR1L1	-1.10127	-0.581747	-6.06758	1.00874e-08	2.14212e-07	9.5679
WDR66	-0.837499	2.21426	-6.06474	1.02316e-08	2.17047e-07	9.5542
NDRG4	-0.927095	8.64036	-6.06247	1.03482e-08	2.19292e-07	9.54325
NPSR1	-1.9381	-4.10707	-6.05947	1.05046e-08	2.22373e-07	9.52877
SPTBN4	-1.0323	5.95538	-6.05828	1.05672e-08	2.23465e-07	9.52303
CMBL	1.38962	3.73511	6.05089	1.09641e-08	2.31616e-07	9.48743
SLAMF7	-2.06139	2.41221	-6.05048	1.09866e-08	2.31626e-07	9.48544
SLC6A8	0.717157	6.34061	6.05047	1.09874e-08	2.31626e-07	9.48538
FABP12	-2.19516	-3.60348	-6.04967	1.10312e-08	2.32309e-07	9.48153
PFKM	0.553639	7.02683	6.04917	1.10589e-08	2.32649e-07	9.47911
TRIM72	2.06905	-3.74184	6.04797	1.11252e-08	2.33803e-07	9.47334
STXBP3	-0.682361	4.5718	-6.0444	1.13249e-08	2.37753e-07	9.45616
IMP4	0.566291	5.22715	6.04373	1.1363e-08	2.38305e-07	9.45292
P4HA2-AS1	-1.15267	-0.14293	-6.04265	1.14241e-08	2.3934e-07	9.44774
FOXJ3	-0.417586	6.56097	-6.03964	1.15969e-08	2.42708e-07	9.43324
MAPK1	-0.466284	7.0275	-6.03902	1.16332e-08	2.43217e-07	9.43023
ITGB1BP2	1.08403	1.53546	6.03748	1.17229e-08	2.4484e-07	9.42281
PRR5	-1.23019	3.63324	-6.03472	1.18853e-08	2.47977e-07	9.40952
SRRM1	-0.624595	6.78327	-6.03397	1.19298e-08	2.48626e-07	9.40591
RPS7	0.955395	9.52469	6.03378	1.19409e-08	2.48626e-07	9.40502
C14orf93	0.570385	4.26449	6.03199	1.20481e-08	2.5027e-07	9.39639
GPR61	-1.76727	-0.772917	-6.03188	1.20542e-08	2.5027e-07	9.3959
HMBS	0.713499	4.35278	6.03184	1.20569e-08	2.5027e-07	9.39568
CITED1	1.59628	0.93847	6.03051	1.21373e-08	2.51681e-07	9.38927
MIR181B2	1.18741	-6.14354	6.03013	1.21598e-08	2.51891e-07	9.38747
ADAMDEC1	-2.2636	2.55705	-6.02827	1.22734e-08	2.53983e-07	9.3785
IL2RG	-2.044	3.41915	-6.02744	1.23239e-08	2.54769e-07	9.37454
PIK3R2	0.600691	6.47657	6.02677	1.23654e-08	2.55367e-07	9.37129
SLC16A14	0.798206	4.19899	6.02138	1.27014e-08	2.6204e-07	9.3454
AOAH	-1.47455	3.34624	-6.01826	1.29004e-08	2.65874e-07	9.33039
SPOCK2	-1.89687	6.6979	-6.01633	1.30246e-08	2.68161e-07	9.32115
C5orf64	-1.70786	-3.35993	-6.01515	1.31017e-08	2.69474e-07	9.31545
CALHM3	-1.50716	-1.74143	-6.00984	1.34519e-08	2.76397e-07	9.28998
SCAP	0.548645	6.94228	6.00861	1.35343e-08	2.7781e-07	9.28408
RPS18	0.932583	10.4163	6.00736	1.36187e-08	2.79258e-07	9.27809
PHB2	0.662998	7.90973	6.00705	1.36397e-08	2.79408e-07	9.2766
TPRG1L	-1.1313	5.10673	-6.00561	1.37377e-08	2.81131e-07	9.26968
IRX5	2.56709	-0.0409652	6.00347	1.38846e-08	2.8385e-07	9.25942
MCOLN2	-1.99745	0.393789	-6.00128	1.40365e-08	2.86666e-07	9.24892
BTBD2	0.463836	7.23477	5.99841	1.42386e-08	2.90502e-07	9.23511
PABPC3	0.992362	-0.114927	5.99724	1.43215e-08	2.919e-07	9.22951
TMED5	-0.723391	5.31323	-5.9964	1.4381e-08	2.92818e-07	9.22551
KIF5A	-1.19319	7.19831	-5.99544	1.44497e-08	2.93922e-07	9.22091
PINK1-AS	-0.653895	2.6236	-5.994	1.45536e-08	2.95738e-07	9.214
RPL8	0.883717	10.618	5.99195	1.47026e-08	2.98467e-07	9.20416
ZNF69	1.00551	2.68406	5.9904	1.48157e-08	3.00275e-07	9.19677
INPP1	-0.698849	5.20927	-5.99033	1.48212e-08	3.00275e-07	9.1964
SNRPD1	0.815108	6.05593	5.99008	1.48398e-08	3.00351e-07	9.19519
NRG1-IT1	-1.64799	-3.63996	-5.98878	1.49352e-08	3.01981e-07	9.18901
JAZF1-AS1	-1.55138	-1.50274	-5.98435	1.52672e-08	3.08386e-07	9.16779
MAPT	-1.00402	9.23381	-5.98373	1.53148e-08	3.09039e-07	9.16478
ZPLD1	-2.78404	-2.89135	-5.97982	1.56143e-08	3.14769e-07	9.14609
FGL2	-1.69581	4.2356	-5.97945	1.5643e-08	3.15035e-07	9.14432
TMEM126A	0.685424	3.77834	5.9774	1.58027e-08	3.17936e-07	9.13451
ACP2	-0.640835	5.69576	-5.97688	1.58432e-08	3.18435e-07	9.13204
KLHDC8B	-0.710342	5.95427	-5.97436	1.60426e-08	3.22122e-07	9.11998
DYNC1I1	-2.1985	3.95123	-5.96793	1.65618e-08	3.32219e-07	9.08924
CXorf57	-2.55918	1.58636	-5.96686	1.66497e-08	3.33651e-07	9.08413
C11orf1	0.912467	3.55116	5.96434	1.68587e-08	3.37506e-07	9.07209
COL9A2	-1.9154	5.23873	-5.96373	1.69096e-08	3.37977e-07	9.06918
FREM1	-2.03477	3.09701	-5.96366	1.69155e-08	3.37977e-07	9.06884
ITGA8	-2.42841	3.87756	-5.96097	1.71421e-08	3.42167e-07	9.056
MRPL23	0.761797	5.28791	5.95964	1.72557e-08	3.44056e-07	9.04963
FBXO6	-1.06501	2.4645	-5.95947	1.72706e-08	3.44056e-07	9.04879
CNTN4-AS2	1.95329	-4.77525	5.95756	1.74346e-08	3.46982e-07	9.03967
EXOSC10	-0.602258	6.83315	-5.95296	1.78356e-08	3.54615e-07	9.01773
PRKACA	-0.478884	7.13474	-5.95139	1.79742e-08	3.56693e-07	9.01026
NR3C1	-1.13482	4.88743	-5.95138	1.79754e-08	3.56693e-07	9.0102
PDYN	-2.41558	-3.80531	-5.94581	1.84776e-08	3.663e-07	8.98361
FARSB	0.570033	6.05072	5.94411	1.86327e-08	3.69015e-07	8.97554
NBR1	-0.502096	7.44459	-5.94141	1.88831e-08	3.73608e-07	8.96266
GNAI1	-0.767019	6.05029	-5.941	1.89217e-08	3.74008e-07	8.96069
RNF214	0.555035	4.46336	5.93529	1.94623e-08	3.84319e-07	8.93351
PTGER3	-1.74714	3.94357	-5.93463	1.95261e-08	3.85204e-07	8.93035
PUS1	0.667782	4.68252	5.93295	1.96891e-08	3.88043e-07	8.92233
PLD3	-0.75609	8.99765	-5.93121	1.98582e-08	3.90995e-07	8.91408
SH3GLB2	-0.568673	6.75675	-5.93077	1.99016e-08	3.91469e-07	8.91197
GATAD2A	0.512149	6.37934	5.92752	2.0224e-08	3.97425e-07	8.89647
ICMT	-0.549562	6.38107	-5.92678	2.02977e-08	3.98368e-07	8.89296
KIF13B	-0.702399	5.29849	-5.92664	2.03113e-08	3.98368e-07	8.89231
TSSC2	2.16998	1.36433	5.92551	2.0425e-08	4.00212e-07	8.88692
ELFN1	-1.70247	4.5219	-5.92517	2.04593e-08	4.0024e-07	8.88531
C7orf43	-0.546154	5.30798	-5.9251	2.04659e-08	4.0024e-07	8.88499
TIMM44	0.480369	5.6687	5.92336	2.06423e-08	4.033e-07	8.87672
WDR18	0.653679	5.82099	5.9198	2.10078e-08	4.10046e-07	8.85978
MDGA1	-1.843	6.25466	-5.91849	2.1144e-08	4.11982e-07	8.85355
HNRNPAB	0.710669	7.68344	5.91846	2.11476e-08	4.11982e-07	8.85338
KCNC2	-3.72124	-0.688324	-5.91814	2.11807e-08	4.12231e-07	8.85187
LMO3	3.46971	-0.267641	5.91703	2.1297e-08	4.14097e-07	8.84659
ZNF562	0.587521	4.95137	5.9166	2.1342e-08	4.14575e-07	8.84456
UNG	0.818074	5.70005	5.91609	2.13961e-08	4.15228e-07	8.84211
TRIM28	0.680833	8.76753	5.91557	2.14509e-08	4.15892e-07	8.83965
TWIST1	2.98148	3.23425	5.91383	2.16359e-08	4.19078e-07	8.83136
PEPD	-0.635749	6.06975	-5.91307	2.17166e-08	4.20241e-07	8.82777
RHBDD2	-0.895491	7.00513	-5.91252	2.17753e-08	4.20976e-07	8.82516
TCTEX1D1	-1.67092	0.631344	-5.91131	2.19058e-08	4.23094e-07	8.8194
LST1	-1.36214	3.01869	-5.90804	2.22619e-08	4.29563e-07	8.80385
PRRX2	2.19606	1.28398	5.90768	2.23009e-08	4.29906e-07	8.80216
ZHX2	-0.929383	4.45363	-5.90739	2.23333e-08	4.30124e-07	8.80076
PTAFR	-1.37812	2.85524	-5.9066	2.24197e-08	4.31376e-07	8.79703
UXT	0.635445	5.00076	5.90286	2.28364e-08	4.38978e-07	8.77927
CUX2	2.48943	3.46011	5.89975	2.31884e-08	4.45323e-07	8.76451
CLMP	1.72851	1.65596	5.8959	2.36317e-08	4.53406e-07	8.74625
CDCA4	1.02234	4.34606	5.89555	2.36726e-08	4.53761e-07	8.74458
KIAA1644	-1.9975	2.67988	-5.89499	2.37378e-08	4.54582e-07	8.74193
VWA5B1	-3.04293	-1.30944	-5.89404	2.38496e-08	4.56292e-07	8.73739
RPS19	0.81853	9.53299	5.89288	2.39856e-08	4.58462e-07	8.73191
TEX10	0.662748	5.14221	5.89256	2.40234e-08	4.58752e-07	8.73039
CDKN2C	-1.30839	5.43884	-5.88988	2.43424e-08	4.64405e-07	8.71767
EIF2S3	0.591595	7.5402	5.88754	2.46229e-08	4.69315e-07	8.70662
MIR1276	1.49603	-5.11694	5.88695	2.46947e-08	4.69481e-07	8.70381
ME1	-1.05733	4.1625	-5.88693	2.46976e-08	4.69481e-07	8.70369
SETD7	0.737453	5.89228	5.8869	2.4701e-08	4.69481e-07	8.70356
CLIP1	-0.543925	6.25702	-5.88193	2.53119e-08	4.80642e-07	8.68
HOXD10	2.61812	0.420378	5.87878	2.57056e-08	4.87661e-07	8.66511
SRD5A3	0.675485	3.86455	5.87845	2.57484e-08	4.88017e-07	8.66351
ZCCHC4	0.616272	3.18966	5.87578	2.60879e-08	4.9399e-07	8.65087
RPA2	-0.541973	5.5714	-5.87542	2.61334e-08	4.94389e-07	8.64919
SERPINB1	-1.20068	4.40205	-5.8728	2.64716e-08	4.99867e-07	8.63679
WDR16	-1.77094	-3.96617	-5.8728	2.64722e-08	4.99867e-07	8.63677
TLR7	-1.71212	1.05276	-5.87099	2.67079e-08	5.03847e-07	8.62822
PDE6G	-1.69629	1.08491	-5.86511	2.74897e-08	5.18115e-07	8.6004
OSTM1	-0.635992	4.96645	-5.86484	2.75256e-08	5.18309e-07	8.59914
AHCYL2	-0.691584	5.18417	-5.86336	2.77264e-08	5.21606e-07	8.59213
CECR5	0.541726	5.98143	5.8606	2.8104e-08	5.28219e-07	8.57909
SMAD3	1.37027	4.3041	5.85964	2.8236e-08	5.30209e-07	8.57457
ANKRD12	-0.723757	5.96088	-5.85849	2.83967e-08	5.32733e-07	8.5691
NKAIN4	3.41901	-0.0482595	5.85642	2.8686e-08	5.37664e-07	8.55932
TBX20	-2.00638	1.78961	-5.85568	2.87898e-08	5.38987e-07	8.55584
MYOD1	2.17742	-4.89174	5.85554	2.88098e-08	5.38987e-07	8.55517
ZNF239	1.1488	3.42666	5.85516	2.88637e-08	5.39499e-07	8.55336
CREG2	-2.24302	0.84417	-5.84907	2.9737e-08	5.55264e-07	8.52462
CORO2B	-1.25219	4.69726	-5.8489	2.97619e-08	5.55264e-07	8.52382
CCBE1	-2.36034	3.28135	-5.84773	2.99333e-08	5.57949e-07	8.51828
WDR78	-0.794887	1.64791	-5.84626	3.01496e-08	5.61464e-07	8.51134
ITGA3	-1.37122	6.24508	-5.8456	3.02457e-08	5.62737e-07	8.50827
MC4R	-2.35053	1.22937	-5.84412	3.04658e-08	5.66311e-07	8.50128
CTSH	-1.43377	5.27425	-5.84381	3.05125e-08	5.66661e-07	8.4998
SLC48A1	-0.690299	4.79572	-5.84322	3.06014e-08	5.67792e-07	8.49699
KYNU	-1.5716	0.815716	-5.84127	3.08935e-08	5.72687e-07	8.48784
GSR	0.429525	5.57723	5.83987	3.11062e-08	5.76104e-07	8.48122
C2CD4D	-1.93342	-2.42698	-5.83748	3.14716e-08	5.8234e-07	8.46996
TMPRSS3	-2.26635	-0.720084	-5.83612	3.16824e-08	5.85706e-07	8.46352
CD1E	-2.68339	-0.87659	-5.83565	3.17553e-08	5.86518e-07	8.46131
DLC1	-1.2355	6.96182	-5.83353	3.20852e-08	5.92073e-07	8.45134
CSTA	-1.81238	0.632565	-5.831	3.24846e-08	5.98898e-07	8.43942
OR13J1	-1.8695	-3.11285	-5.82998	3.26469e-08	6.01343e-07	8.43461
TRPC5	-2.85971	-1.85474	-5.82947	3.27282e-08	6.02294e-07	8.43221
STX2	-0.478626	6.2528	-5.82886	3.28272e-08	6.03567e-07	8.4293
NCAPD3	0.879387	5.17209	5.8274	3.3062e-08	6.07335e-07	8.42243
GDI2	0.62199	7.78036	5.82683	3.31541e-08	6.08172e-07	8.41975
PPIF	0.685312	5.80848	5.82674	3.31676e-08	6.08172e-07	8.41936
ATPIF1	-0.61795	6.53687	-5.82226	3.39022e-08	6.2108e-07	8.39824
OPRD1	2.49605	-2.43553	5.82039	3.42136e-08	6.2622e-07	8.38942
CTSS	-1.377	5.26519	-5.82007	3.4267e-08	6.26632e-07	8.38792
DLEU1	0.78743	2.34957	5.81842	3.45436e-08	6.30966e-07	8.38017
FAM136A	0.543469	5.50217	5.81828	3.45663e-08	6.30966e-07	8.37954
HECTD3	-0.498341	5.65218	-5.81633	3.48976e-08	6.36442e-07	8.37034
GTF3C3	0.48116	5.44859	5.81155	3.57212e-08	6.50447e-07	8.34786
AGFG2	-0.626833	4.57909	-5.8115	3.57297e-08	6.50447e-07	8.34763
ZNF16	0.54733	3.45856	5.81101	3.58149e-08	6.51413e-07	8.34533
UQCRC2	0.410515	7.22014	5.81045	3.5913e-08	6.52613e-07	8.34269
LEPREL4	0.690138	5.3727	5.81008	3.59772e-08	6.52663e-07	8.34097
ARHGEF11	-0.579965	7.09664	-5.81001	3.5991e-08	6.52663e-07	8.3406
SNX5	0.459116	5.9286	5.80988	3.60123e-08	6.52663e-07	8.34003
FPGT-TNNI3K	-1.63968	-4.41719	-5.80772	3.63941e-08	6.58994e-07	8.32987
RASGEF1A	-2.2184	0.638769	-5.80705	3.65127e-08	6.60551e-07	8.32673
ICA1L	-0.925675	5.6686	-5.80653	3.66068e-08	6.61663e-07	8.32425
FMN2	-0.694671	4.8884	-5.80604	3.66935e-08	6.62217e-07	8.32197
ZNF333	0.617939	4.76641	5.80599	3.67028e-08	6.62217e-07	8.32173
TCF7	-1.36218	4.2298	-5.80567	3.67608e-08	6.62674e-07	8.3202
NUMBL	-0.63108	6.0787	-5.80523	3.68388e-08	6.6349e-07	8.31816
WNT8A	-1.92078	-3.46557	-5.80386	3.70864e-08	6.67357e-07	8.3117
MAZ	0.668319	8.62707	5.80249	3.73348e-08	6.71232e-07	8.30527
SLC25A5	0.676807	7.02616	5.80151	3.75134e-08	6.73845e-07	8.30067
TAF12	-0.554563	4.2001	-5.80018	3.77574e-08	6.77628e-07	8.29442
P2RY12	-2.23428	-0.449523	-5.79881	3.80104e-08	6.81565e-07	8.28798
STMN2	-1.00953	10.8404	-5.79843	3.80802e-08	6.82214e-07	8.28621
BAZ1A	0.856921	5.09992	5.79803	3.81544e-08	6.8294e-07	8.28434
DMAP1	-0.51614	5.91914	-5.79711	3.83264e-08	6.85414e-07	8.28
CCR6	-1.67395	0.439557	-5.79409	3.88931e-08	6.94935e-07	8.26586
DPH3	-0.588405	4.94471	-5.79378	3.89529e-08	6.95391e-07	8.26438
OBP2A	1.97223	-4.57452	5.79349	3.90074e-08	6.95752e-07	8.26303
SNORD96A	0.923531	0.42698	5.7912	3.94442e-08	7.02924e-07	8.2523
SNTG2	-1.71719	0.81218	-5.78789	4.00857e-08	7.1373e-07	8.23675
IP6K2	0.579316	7.34808	5.7869	4.02785e-08	7.16155e-07	8.23212
FAM105A	-0.758327	3.82091	-5.78683	4.02926e-08	7.16155e-07	8.23179
PGPEP1	-1.2671	4.56995	-5.78645	4.03674e-08	7.16858e-07	8.23
LIG3	0.645339	5.19278	5.78532	4.059e-08	7.19907e-07	8.2247
ANKRD13C	-0.519894	4.94569	-5.78521	4.06101e-08	7.19907e-07	8.22422
LRGUK	-1.77358	1.38557	-5.78316	4.1018e-08	7.26502e-07	8.21459
THOP1	0.532614	6.02908	5.7821	4.12304e-08	7.29627e-07	8.20961
ADAMTS20	2.69808	-2.88475	5.77818	4.20237e-08	7.42474e-07	8.19124
SYNRG	-0.57877	6.2898	-5.77815	4.20296e-08	7.42474e-07	8.19111
NDFIP1	-0.660041	7.85517	-5.77523	4.26297e-08	7.5242e-07	8.17745
SORBS2	-1.18579	7.26448	-5.77505	4.26682e-08	7.52444e-07	8.17658
LINC00426	-1.6107	-0.866489	-5.77299	4.30958e-08	7.59325e-07	8.16697
PRMT7	0.42417	5.61246	5.77276	4.31448e-08	7.59527e-07	8.16587
ZNF263	0.416179	5.47694	5.77065	4.3589e-08	7.66233e-07	8.156
ZRANB3	0.763975	3.14745	5.77059	4.36012e-08	7.66233e-07	8.15573
MPV17L	1.87415	1.23673	5.7688	4.39832e-08	7.72276e-07	8.14733
HMGCL	-0.843339	4.14355	-5.76756	4.42485e-08	7.76263e-07	8.14153
RASL10B	1.12153	4.77787	5.76436	4.4941e-08	7.87257e-07	8.12657
TNFRSF1B	-1.28465	5.17525	-5.76431	4.49528e-08	7.87257e-07	8.12631
TRIM3	-0.508915	5.64666	-5.75909	4.6106e-08	8.06755e-07	8.10191
HMGA1	0.810057	7.86896	5.75849	4.62406e-08	8.08414e-07	8.0991
ERMAP	-0.726101	3.52297	-5.75602	4.67981e-08	8.17455e-07	8.08755
TLR8	-1.82297	0.202452	-5.75521	4.69815e-08	8.19953e-07	8.08378
HMX2	3.11682	-4.41737	5.75442	4.71611e-08	8.2238e-07	8.08011
GRB2	-0.448265	8.08169	-5.75299	4.7491e-08	8.2742e-07	8.07339
CD5	-2.01969	1.72166	-5.75223	4.76661e-08	8.29758e-07	8.06985
MKNK1	-0.730798	4.79175	-5.75042	4.80855e-08	8.36342e-07	8.0614
SLC6A11	3.21065	-1.56062	5.74952	4.82946e-08	8.39259e-07	8.05722
PRKAG2	-0.766177	4.91125	-5.74886	4.84508e-08	8.41252e-07	8.05411
C1QTNF2	-1.76701	2.4147	-5.74477	4.94211e-08	8.57364e-07	8.03501
BYSL	0.566577	4.76939	5.74418	4.95608e-08	8.59053e-07	8.03229
CHRNE	-1.22355	0.93059	-5.74366	4.96872e-08	8.6051e-07	8.02983
SPIN2B	0.558937	2.39811	5.74014	5.054e-08	8.74531e-07	8.01344
ATP6AP2	-0.533671	6.8835	-5.73848	5.09485e-08	8.80849e-07	8.00568
AHDC1	-0.690915	5.80514	-5.73776	5.11266e-08	8.83176e-07	8.00232
FBXO2	-2.01685	2.54598	-5.73573	5.1632e-08	8.91146e-07	7.99285
PPIEL	-1.31124	3.29903	-5.73529	5.17426e-08	8.92297e-07	7.99078
CXXC5	-0.956328	5.41427	-5.73201	5.25695e-08	9.05124e-07	7.97551
KCTD19	-1.39052	1.53702	-5.73198	5.25757e-08	9.05124e-07	7.9754
UBXN8	0.685576	3.72692	5.7316	5.26742e-08	9.0605e-07	7.97359
GS1-259H13.2	-1.32532	0.63651	-5.7314	5.2724e-08	9.06137e-07	7.97268
PROK1	-1.85504	-1.66062	-5.72941	5.32357e-08	9.14157e-07	7.96338
RASGRF1	-2.19064	0.450103	-5.72874	5.34065e-08	9.16315e-07	7.96029
ANGPTL2	1.09846	4.9592	5.72724	5.37963e-08	9.21939e-07	7.95329
UCK2	0.565361	6.09589	5.72713	5.38252e-08	9.21939e-07	7.95277
FNDC8	0.829528	2.52796	5.72341	5.48023e-08	9.37883e-07	7.93544
LMNB2	0.893193	7.10924	5.72076	5.55095e-08	9.49185e-07	7.92309
SGTB	-0.598541	4.66006	-5.71725	5.64579e-08	9.64588e-07	7.90677
FXN	0.636836	2.76554	5.71641	5.66865e-08	9.67679e-07	7.90288
OSTC	0.599827	5.87799	5.71353	5.74805e-08	9.80407e-07	7.88948
MTSS1L	0.516043	7.04889	5.71082	5.82394e-08	9.91939e-07	7.87685
MRPS27	0.531951	5.85991	5.71076	5.82544e-08	9.91939e-07	7.8766
ACSM4	-2.22564	1.23525	-5.71052	5.83234e-08	9.9228e-07	7.87546
DHPS	0.560817	6.63404	5.70979	5.85278e-08	9.94923e-07	7.87209
EIF3F	0.675643	7.56946	5.70858	5.88726e-08	9.99946e-07	7.86643
C1QL3	-2.31461	1.3776	-5.70676	5.9392e-08	1.00792e-06	7.85797
CD226	-1.4179	-0.247503	-5.70609	5.95828e-08	1.01032e-06	7.85489
POLR3K	0.734147	3.94676	5.70572	5.96889e-08	1.01127e-06	7.85317
SLC25A15	0.859052	3.67074	5.70373	6.02645e-08	1.02017e-06	7.84393
LHX8	2.65142	-5.46966	5.70296	6.04889e-08	1.02311e-06	7.84035
MUC15	-5.42723	-0.251544	-5.70271	6.05641e-08	1.02348e-06	7.83915
TMEM167B	-0.546467	5.63272	-5.70254	6.06114e-08	1.02348e-06	7.8384
PNMAL2	-0.779518	4.84551	-5.70152	6.0911e-08	1.02768e-06	7.83365
ZBTB8OS	-0.540976	3.75141	-5.70128	6.09829e-08	1.02804e-06	7.83251
CASC2	-0.904834	0.800499	-5.70047	6.12195e-08	1.03117e-06	7.82879
CRNDE	1.72914	2.94642	5.69948	6.1513e-08	1.03526e-06	7.82418
AMH	2.33465	4.88313	5.699	6.16547e-08	1.03669e-06	7.82196
SLC26A11	-0.779556	6.70454	-5.69885	6.17004e-08	1.03669e-06	7.82125
CNRIP1	0.533803	6.31402	5.69788	6.19898e-08	1.04069e-06	7.81674
NR1I2	-1.63326	-1.06597	-5.69753	6.20932e-08	1.04156e-06	7.81514
KNCN	-2.23877	-2.43635	-5.69682	6.23083e-08	1.04431e-06	7.81181
GLP1R	2.11309	-2.89955	5.6963	6.24651e-08	1.04607e-06	7.80939
PDZRN3	1.6985	3.40331	5.69389	6.31925e-08	1.05738e-06	7.79824
MORN3	-0.909793	0.483848	-5.69289	6.35005e-08	1.06166e-06	7.79356
ZNF202	0.698496	4.49651	5.69244	6.36374e-08	1.06307e-06	7.79148
ERAP1	-0.849329	4.91444	-5.69074	6.41615e-08	1.07094e-06	7.78358
FIG4	-0.431337	4.83026	-5.68957	6.45243e-08	1.07611e-06	7.77815
SSX2IP	-0.720604	4.73701	-5.68834	6.49049e-08	1.08157e-06	7.77249
NKAPL	-1.64954	0.896574	-5.68746	6.51813e-08	1.08528e-06	7.7684
WDR4	0.56997	3.60688	5.68711	6.52932e-08	1.08626e-06	7.76675
RAB37	-2.0293	2.50983	-5.68549	6.58036e-08	1.09331e-06	7.75925
ZBTB12	1.16445	4.67731	5.68542	6.5825e-08	1.09331e-06	7.75893
ABCE1	0.643807	6.085	5.68429	6.6184e-08	1.09837e-06	7.7537
NFXL1	0.901642	3.82884	5.68215	6.68687e-08	1.10883e-06	7.74378
EBI3	-1.63893	1.219	-5.67994	6.75851e-08	1.11941e-06	7.73352
CD48	-1.78147	3.10516	-5.67984	6.76172e-08	1.11941e-06	7.73307
DDX31	0.518975	4.04686	5.67853	6.80439e-08	1.12555e-06	7.72701
PTMA	0.712332	10.0124	5.67636	6.87603e-08	1.13648e-06	7.71692
SCARNA12	0.878506	1.17188	5.676	6.88798e-08	1.13753e-06	7.71525
PCOLCE2	2.37691	-0.671649	5.67451	6.93728e-08	1.14474e-06	7.70839
RPS25	0.971852	8.54112	5.67428	6.94513e-08	1.1451e-06	7.7073
POLR2H	0.544588	5.56414	5.67408	6.95189e-08	1.14528e-06	7.70636
DNAH11	1.70069	-1.9313	5.67378	6.96173e-08	1.14597e-06	7.705
MFSD6	-0.707517	5.69545	-5.67277	6.99556e-08	1.15061e-06	7.70033
C2CD2	1.41164	4.05147	5.67235	7.00989e-08	1.15203e-06	7.69836
VILL	0.717843	4.16902	5.67185	7.02674e-08	1.15386e-06	7.69605
NME1	1.00112	5.50765	5.66899	7.12408e-08	1.1689e-06	7.6828
DNAJB6	-0.467063	7.22881	-5.6682	7.1511e-08	1.17239e-06	7.67916
C6orf1	-0.749505	5.33321	-5.66591	7.2302e-08	1.1844e-06	7.66857
NSMAF	0.471771	4.87897	5.66451	7.27896e-08	1.19142e-06	7.66209
TFEB	-1.09017	4.35319	-5.6642	7.28987e-08	1.19225e-06	7.66065
DLEU7	-1.90645	0.3809	-5.66308	7.32909e-08	1.19769e-06	7.65549
WIPI2	-0.4057	6.93312	-5.66292	7.33497e-08	1.19769e-06	7.65471
CACNA1F	-1.30736	1.04095	-5.66231	7.35644e-08	1.20023e-06	7.6519
SSBP3	-0.615825	7.81067	-5.66193	7.36982e-08	1.20145e-06	7.65015
NPPA-AS1	-1.72036	-0.83651	-5.65937	7.46083e-08	1.21531e-06	7.63833
HLA-DRB1	-1.75084	6.98411	-5.65697	7.54742e-08	1.22842e-06	7.62722
MEP1A	-2.08757	-2.81334	-5.6536	7.67042e-08	1.24744e-06	7.61166
RTN4RL2	1.44093	3.18124	5.65332	7.6809e-08	1.24815e-06	7.61035
FLII	-0.5642	7.12086	-5.65306	7.69042e-08	1.24869e-06	7.60915
RAB3IP	-0.855585	4.66372	-5.65083	7.77302e-08	1.2611e-06	7.59887
RUVBL1	0.758572	5.79159	5.64781	7.88662e-08	1.2785e-06	7.5849
RBM14	0.465387	6.61261	5.64509	7.98993e-08	1.29422e-06	7.57238
POLR3H	0.45805	5.29231	5.64484	7.99966e-08	1.29476e-06	7.5712
HCK	-1.30784	3.53758	-5.64445	8.0148e-08	1.29617e-06	7.56938
CD86	-1.41917	2.68633	-5.64201	8.109e-08	1.31036e-06	7.55814
MAP2K2	0.519084	7.06375	5.64028	8.17641e-08	1.3202e-06	7.55017
SCP2	-0.640891	5.63228	-5.63961	8.20275e-08	1.3234e-06	7.54707
2016-09-11	0.511222	6.8425	5.63873	8.23724e-08	1.32791e-06	7.54303
ZNRD1	0.487225	4.26968	5.63787	8.27151e-08	1.33238e-06	7.53903
TMX4	-0.661168	5.95513	-5.6376	8.28211e-08	1.33303e-06	7.5378
TGFBRAP1	0.371561	5.35313	5.63685	8.31196e-08	1.33677e-06	7.53434
ZNF74	0.669875	5.61938	5.63567	8.35909e-08	1.34328e-06	7.5289
THEM5	-1.75294	-0.58457	-5.63504	8.38435e-08	1.34618e-06	7.52599
TRPV2	-1.50975	4.36513	-5.63489	8.39041e-08	1.34618e-06	7.5253
DLEU7-AS1	-1.49299	-1.05594	-5.6343	8.41399e-08	1.3489e-06	7.5226
POLD2	0.57565	6.82841	5.6341	8.4223e-08	1.34916e-06	7.52165
NARFL	0.402943	5.42219	5.63206	8.50461e-08	1.36128e-06	7.51228
SNORA69	1.22645	-2.45664	5.62964	8.60382e-08	1.37607e-06	7.50112
SF3B3	0.488725	7.59624	5.62804	8.67005e-08	1.38557e-06	7.49374
SLIT1	1.78333	5.88701	5.62776	8.68183e-08	1.38636e-06	7.49243
DDR2	1.53728	2.1447	5.62695	8.71523e-08	1.3906e-06	7.48874
FMO3	-2.45877	1.09744	-5.6267	8.7258e-08	1.39119e-06	7.48757
HSPB11	-0.60969	4.46527	-5.62448	8.81883e-08	1.40492e-06	7.47737
COPS7B	0.402688	5.95052	5.62344	8.86312e-08	1.40934e-06	7.47254
MRPL36	0.584958	4.04092	5.62339	8.86528e-08	1.40934e-06	7.47231
APBA1	-1.04641	5.93284	-5.62334	8.86745e-08	1.40934e-06	7.47207
TMUB2	-0.483569	6.44139	-5.6225	8.90293e-08	1.41387e-06	7.46823
TARDBP	-0.397047	7.78095	-5.62178	8.93384e-08	1.41767e-06	7.46489
CCDC160	-2.0809	-3.38613	-5.62144	8.9483e-08	1.41885e-06	7.46334
NAT10	0.468168	5.80465	5.621	8.96711e-08	1.42073e-06	7.46132
NFAM1	-1.20474	2.83908	-5.6202	9.00157e-08	1.42507e-06	7.45763
LGR5	2.38213	0.678679	5.61974	9.02115e-08	1.42706e-06	7.45553
PLCH2	-1.48004	3.30961	-5.61924	9.04294e-08	1.42939e-06	7.45321
PLEK	-1.49146	4.12482	-5.61878	9.06288e-08	1.43143e-06	7.45109
SERINC3	-0.589286	6.3914	-5.61821	9.08759e-08	1.43421e-06	7.44847
CLTC	-0.589026	8.95136	-5.6153	9.21469e-08	1.45314e-06	7.43511
GCDH	0.517876	4.21356	5.61506	9.22527e-08	1.45368e-06	7.434
PKD2	0.796362	5.45753	5.61337	9.30033e-08	1.46437e-06	7.4262
NDUFA7	0.546457	4.91281	5.61283	9.32405e-08	1.46696e-06	7.42375
ZNF124	1.01635	3.64725	5.61208	9.35746e-08	1.47108e-06	7.42031
ANO6	-0.901755	7.04182	-5.61179	9.37074e-08	1.47203e-06	7.41894
ZNF436	-0.634918	4.72123	-5.61136	9.38991e-08	1.4739e-06	7.41698
NCAN	4.32475	3.27609	5.6107	9.41955e-08	1.47741e-06	7.41394
GMEB2	0.472801	5.02136	5.60964	9.46749e-08	1.48344e-06	7.40906
EPHB3	-1.40379	4.86765	-5.60952	9.47265e-08	1.48344e-06	7.40854
CLMN	-0.968275	5.75962	-5.60621	9.62386e-08	1.50594e-06	7.39329
SIM2	-0.70125	2.05279	-5.60605	9.6312e-08	1.50594e-06	7.39256
CASD1	-0.820346	6.67548	-5.60548	9.65738e-08	1.50866e-06	7.38995
BFSP1	1.32579	-0.420208	5.60535	9.66346e-08	1.50866e-06	7.38934
DCLK3	-1.366	4.44477	-5.60268	9.78752e-08	1.52685e-06	7.37707
PARVA	-1.10143	7.17547	-5.6022	9.80963e-08	1.52913e-06	7.3749
DOCK10	-1.03215	5.368	-5.60128	9.85279e-08	1.53467e-06	7.37067
FAM220A	-0.456459	4.99055	-5.59621	1.00943e-07	1.57109e-06	7.34737
DPH5	0.631698	4.91403	5.59121	1.03378e-07	1.60776e-06	7.32443
BMP8B	-1.67495	3.12737	-5.59085	1.03552e-07	1.60923e-06	7.32281
MINOS1	-0.522693	5.01353	-5.59061	1.03671e-07	1.60984e-06	7.32171
N6AMT1	0.516894	2.86782	5.5893	1.04325e-07	1.61852e-06	7.31566
MYCBPAP	-1.35181	0.843156	-5.58912	1.04412e-07	1.61852e-06	7.31486
AK5	-1.44197	3.44104	-5.58886	1.04541e-07	1.61852e-06	7.31367
CALHM1	-1.6246	-1.4411	-5.58884	1.0455e-07	1.61852e-06	7.31359
SLA2	-1.46766	0.714007	-5.58854	1.04699e-07	1.61945e-06	7.31222
REPS2	-0.968059	2.94557	-5.5883	1.04823e-07	1.61945e-06	7.31108
MRPL11	0.652127	5.19799	5.58824	1.04849e-07	1.61945e-06	7.31084
MYO1H	-0.906535	-0.230331	-5.58477	1.06597e-07	1.64519e-06	7.29494
LINC00341	-0.995437	3.93502	-5.58458	1.06694e-07	1.64544e-06	7.29406
SIRPA	-1.01499	5.37509	-5.58431	1.06831e-07	1.6463e-06	7.29283
CREBL2	-0.505142	6.12758	-5.58329	1.07355e-07	1.65311e-06	7.28812
LINC00052	-2.32704	-4.17358	-5.58282	1.07595e-07	1.65556e-06	7.28596
HENMT1	-1.06926	3.44121	-5.58247	1.07771e-07	1.65702e-06	7.28439
COL22A1	-1.72333	3.73486	-5.58172	1.08157e-07	1.66169e-06	7.28095
SEC31A	0.383271	7.27383	5.58145	1.08295e-07	1.66255e-06	7.27972
DOT1L	0.779354	6.63091	5.58063	1.0872e-07	1.6678e-06	7.27596
CCDC64	-0.936384	5.56296	-5.58016	1.08967e-07	1.67033e-06	7.27378
MAP3K3	-0.57567	6.50454	-5.57986	1.09122e-07	1.67144e-06	7.27241
PRPF3	0.509869	6.37736	5.57961	1.09249e-07	1.67213e-06	7.27129
DLL3	2.51102	2.4377	5.57858	1.09787e-07	1.6791e-06	7.26656
ELMO2	-0.463993	6.44945	-5.57839	1.09886e-07	1.67925e-06	7.26569
HAPLN4	2.03725	2.28715	5.57825	1.09962e-07	1.67925e-06	7.26503
LRRC8C	-0.917371	4.90493	-5.57665	1.10802e-07	1.6908e-06	7.25771
BOK-AS1	-1.47613	-2.89643	-5.57618	1.11052e-07	1.69334e-06	7.25554
ZDHHC9	0.540095	5.63725	5.57466	1.11854e-07	1.70428e-06	7.24862
ACTN2	-1.8347	4.85022	-5.57196	1.13301e-07	1.72504e-06	7.23625
PLEKHM1	-0.629461	5.56716	-5.57109	1.1377e-07	1.73015e-06	7.23228
RNF26	0.675474	5.10004	5.57092	1.13861e-07	1.73015e-06	7.23151
TM6SF2	1.29028	1.13961	5.57087	1.13893e-07	1.73015e-06	7.23124
MS4A6A	-1.2761	4.99215	-5.57064	1.14018e-07	1.73075e-06	7.23018
TAMM41	0.565471	3.18247	5.56983	1.14457e-07	1.73612e-06	7.22649
TANK	-0.408819	4.86878	-5.56898	1.1492e-07	1.74183e-06	7.22261
P2RX5	1.67639	2.08543	5.56797	1.15475e-07	1.74768e-06	7.21797
SIGLEC7	-1.38294	0.527993	-5.56796	1.15478e-07	1.74768e-06	7.21795
ZMYND19	0.558209	5.11819	5.56772	1.15612e-07	1.74841e-06	7.21683
PRKAR1A	-0.553888	8.51789	-5.56745	1.15756e-07	1.74928e-06	7.21563
LARS	0.489832	7.42062	5.56678	1.16128e-07	1.75359e-06	7.21255
ITSN2	-0.629751	5.11515	-5.5661	1.16505e-07	1.75798e-06	7.20942
FAM115A	-0.708284	6.86122	-5.56382	1.17773e-07	1.77579e-06	7.19901
CENPV	1.11588	6.38694	5.56285	1.18317e-07	1.78267e-06	7.19458
C8orf31	1.67442	0.612462	5.56224	1.18661e-07	1.78652e-06	7.19179
SYP	-0.922548	7.77556	-5.56132	1.19183e-07	1.79305e-06	7.18757
XXYLT1	0.489818	4.66268	5.56007	1.19892e-07	1.80237e-06	7.18186
INS	-2.54295	0.0553714	-5.55948	1.20227e-07	1.80607e-06	7.17918
NRAS	-0.530489	6.25802	-5.55571	1.22402e-07	1.83739e-06	7.16193
DPY19L3	0.582154	5.53684	5.55552	1.22511e-07	1.83766e-06	7.16108
C10orf107	-1.72184	-0.341532	-5.55404	1.23374e-07	1.84897e-06	7.15432
BID	0.508055	5.50416	5.55392	1.23447e-07	1.84897e-06	7.15375
BIRC3	-2.03184	3.39489	-5.55268	1.24173e-07	1.85847e-06	7.14812
DCTD	0.601955	5.54552	5.55207	1.24535e-07	1.86251e-06	7.14532
CLCN2	0.720237	3.76519	5.55074	1.25324e-07	1.87293e-06	7.13924
EIF4G3	-0.476548	6.70382	-5.54757	1.27222e-07	1.8999e-06	7.12478
HNRNPL	0.357955	8.2047	5.54614	1.28086e-07	1.91139e-06	7.11827
CPNE1	0.528674	7.32681	5.54372	1.29564e-07	1.93129e-06	7.10724
PRTFDC1	0.746314	4.48929	5.54365	1.2961e-07	1.93129e-06	7.1069
SFXN5	-0.707076	4.25259	-5.54327	1.29841e-07	1.93331e-06	7.10519
CNTN3	-1.93153	0.79549	-5.54283	1.30117e-07	1.93601e-06	7.10314
NSF	-0.874084	6.61612	-5.54086	1.31338e-07	1.95179e-06	7.09416
SEMA3E	-3.06323	1.98715	-5.54081	1.3137e-07	1.95179e-06	7.09392
CRAT	-0.608015	5.94145	-5.54055	1.31527e-07	1.95268e-06	7.09278
ZNF766	0.464625	4.22901	5.53903	1.32481e-07	1.96541e-06	7.08583
RASSF7	-1.11419	3.75598	-5.53834	1.32916e-07	1.97043e-06	7.08267
FHAD1	-1.68801	1.17659	-5.5363	1.34206e-07	1.98809e-06	7.07339
CAMKV	1.73472	5.6394	5.53327	1.36144e-07	2.01533e-06	7.0596
RUNX3	-1.64243	2.98232	-5.53229	1.36777e-07	2.02323e-06	7.05513
LINC00311	1.5325	-3.69471	5.53199	1.36975e-07	2.02468e-06	7.05374
KLRB1	-1.60307	0.78905	-5.5316	1.3723e-07	2.02697e-06	7.05195
LRRC10B	-1.60057	1.29491	-5.53026	1.38099e-07	2.03832e-06	7.04588
HHIP	1.89479	0.205198	5.52936	1.3869e-07	2.04536e-06	7.04178
SNRPE	0.866165	6.34335	5.52923	1.38778e-07	2.04536e-06	7.04117
LRRC71	-1.308	2.05758	-5.52868	1.39141e-07	2.04922e-06	7.03866
PIK3IP1	-0.875331	5.31813	-5.52734	1.40025e-07	2.05967e-06	7.03257
KCNJ9	-1.24938	3.25355	-5.5273	1.40053e-07	2.05967e-06	7.03237
TMEM136	0.739028	4.41359	5.52575	1.41079e-07	2.07325e-06	7.02535
ERBB4	3.09673	-0.629975	5.52544	1.41286e-07	2.07473e-06	7.02395
F11R	-1.1561	4.76358	-5.5253	1.41385e-07	2.07473e-06	7.02327
POLR3GL	-0.529334	5.13152	-5.52454	1.4189e-07	2.08064e-06	7.01985
TECPR2	-0.490657	5.12747	-5.52401	1.42246e-07	2.08435e-06	7.01744
SLC39A10	0.592034	5.84604	5.52257	1.43219e-07	2.09709e-06	7.01088
SLCO4A1	2.36101	0.789564	5.52239	1.43341e-07	2.09737e-06	7.01006
NKX2-5	1.75907	-5.63016	5.52052	1.44616e-07	2.1145e-06	7.00154
HDAC7	0.529533	6.90333	5.5188	1.45801e-07	2.13029e-06	6.9937
RNFT1	-0.675867	3.77501	-5.518	1.46354e-07	2.13683e-06	6.99006
KLHL33	-1.7192	-0.942714	-5.5173	1.46834e-07	2.14229e-06	6.98691
FGD1	0.485744	5.56304	5.51657	1.47346e-07	2.14822e-06	6.98356
RBP5	-1.44227	2.72834	-5.51427	1.48954e-07	2.1701e-06	6.97313
SLC39A3	0.5737	4.8701	5.51375	1.49322e-07	2.17173e-06	6.97075
RPL6	0.842856	10.3169	5.51368	1.49374e-07	2.17173e-06	6.97042
CD300LF	-1.20019	1.84527	-5.51366	1.49387e-07	2.17173e-06	6.97034
TTLL7	-1.04662	3.57408	-5.51314	1.49756e-07	2.17482e-06	6.96796
TNFSF13B	-1.24425	2.52496	-5.51305	1.49814e-07	2.17482e-06	6.96759
SLC15A4	-0.346057	5.2626	-5.51168	1.50791e-07	2.18744e-06	6.96134
AIMP1	0.480528	5.29957	5.51049	1.51638e-07	2.19815e-06	6.95596
DNM3OS	1.47832	2.38015	5.50875	1.5289e-07	2.21472e-06	6.94805
EVI2B	-1.48311	2.93956	-5.50768	1.53667e-07	2.22438e-06	6.94318
RPL30	0.722181	9.46259	5.5074	1.53874e-07	2.2258e-06	6.94188
MED17	0.572085	4.96336	5.50661	1.54447e-07	2.23249e-06	6.93831
EZR	-0.801276	6.55588	-5.50605	1.54855e-07	2.2368e-06	6.93577
WDR7	-0.605643	5.2563	-5.50447	1.56012e-07	2.25191e-06	6.92861
CPLX1	1.38294	4.57655	5.50423	1.56191e-07	2.25288e-06	6.92752
MTPAP	0.462479	5.05872	5.50378	1.56524e-07	2.25608e-06	6.92547
GRAMD1A	0.40994	6.61398	5.50292	1.57164e-07	2.2637e-06	6.92154
UBA52	0.718424	9.00623	5.50136	1.58326e-07	2.27882e-06	6.91446
FAHD2A	0.409313	4.18103	5.50059	1.58902e-07	2.28549e-06	6.91097
YBEY	0.71764	3.89782	5.50007	1.59293e-07	2.28948e-06	6.90861
ARAP2	-1.63953	1.56454	-5.49752	1.61216e-07	2.31549e-06	6.89707
MTHFD1	0.566733	5.86015	5.49451	1.63526e-07	2.347e-06	6.88339
TBC1D2	-0.817556	3.79028	-5.4942	1.63762e-07	2.34872e-06	6.88201
TOX4	-0.381548	6.06307	-5.49381	1.64068e-07	2.35145e-06	6.88021
FEZF2	-1.9961	-2.67777	-5.49173	1.65684e-07	2.37293e-06	6.87079
CELA2A	-1.52507	-3.36022	-5.49156	1.65819e-07	2.37318e-06	6.87001
REXO2	0.806704	4.21231	5.49115	1.66135e-07	2.37453e-06	6.86817
ALDH16A1	0.597152	5.03462	5.49114	1.66147e-07	2.37453e-06	6.86811
ATXN2L	0.423944	8.04326	5.48989	1.67123e-07	2.3868e-06	6.86248
PDS5A	0.450957	6.71518	5.48937	1.67533e-07	2.39097e-06	6.86012
ICAM5	2.03028	-0.304395	5.48816	1.68495e-07	2.40247e-06	6.85462
YDJC	0.58475	4.34473	5.48806	1.68576e-07	2.40247e-06	6.85416
KLHL31	1.83169	0.162221	5.48653	1.69793e-07	2.41812e-06	6.84724
ZNF732	1.51091	0.96725	5.48608	1.70156e-07	2.42159e-06	6.84519
CD80	-1.26911	-0.205539	-5.48542	1.70684e-07	2.4274e-06	6.84221
PLA2G7	-1.37475	3.0106	-5.48384	1.71963e-07	2.44388e-06	6.83503
EIF3E	0.789851	8.09447	5.48272	1.72867e-07	2.45501e-06	6.82999
CCDC166	1.64757	-5.57616	5.4798	1.75264e-07	2.4873e-06	6.81676
KIAA0930	-0.57718	7.6503	-5.47891	1.76001e-07	2.49602e-06	6.81272
PHC2	-0.474941	7.28711	-5.47804	1.76724e-07	2.50452e-06	6.80878
CHEK2	0.930664	3.729	5.47765	1.77047e-07	2.50734e-06	6.80703
ZIC5	2.46236	-5.69113	5.47729	1.77352e-07	2.5099e-06	6.80538
KLC3	0.745099	2.20709	5.47664	1.77892e-07	2.51568e-06	6.80245
MIR124-2	1.72193	-6.07375	5.4765	1.78008e-07	2.51568e-06	6.80183
CDC42SE2	-0.446745	5.41484	-5.47563	1.78741e-07	2.52428e-06	6.79787
SLC35F4	-2.47835	0.385598	-5.47466	1.79556e-07	2.53403e-06	6.7935
LYPLA2	-0.549504	5.93746	-5.47284	1.81104e-07	2.5541e-06	6.78525
BEST4	-0.89866	1.49147	-5.47241	1.81468e-07	2.55745e-06	6.78332
GABRQ	-1.87426	0.765555	-5.47079	1.82861e-07	2.5751e-06	6.77597
APOL2	-1.02947	4.98442	-5.47065	1.82975e-07	2.5751e-06	6.77538
FADS3	-0.785232	5.83821	-5.4703	1.83276e-07	2.57756e-06	6.77379
EPS15L1	0.309587	5.65294	5.46645	1.86629e-07	2.6229e-06	6.75637
NECAP1	-0.528014	6.51505	-5.46542	1.87537e-07	2.63383e-06	6.7517
UBR4	-0.481617	7.86632	-5.46394	1.88845e-07	2.65036e-06	6.74503
DUSP18	-0.812288	1.91276	-5.46306	1.8963e-07	2.65954e-06	6.74104
HSPA1L	-0.643201	2.04276	-5.46257	1.90061e-07	2.66374e-06	6.73886
CLEC12A	-1.66844	-0.459702	-5.46069	1.91749e-07	2.68554e-06	6.73036
SUV39H2	0.822993	3.83118	5.45958	1.92756e-07	2.69778e-06	6.72533
DOCK2	-1.40132	3.61106	-5.45756	1.94595e-07	2.71843e-06	6.7162
HLA-DMB	-1.47207	4.70796	-5.45748	1.94668e-07	2.71843e-06	6.71584
HNRNPD	0.56523	8.2281	5.45741	1.94727e-07	2.71843e-06	6.71555
CD33	-1.31831	1.36043	-5.45737	1.94768e-07	2.71843e-06	6.71535
B3GNTL1	0.572809	3.42986	5.45551	1.96474e-07	2.73777e-06	6.70697
CCT7	0.546787	8.30621	5.4555	1.96486e-07	2.73777e-06	6.70691
ZNF667	0.82007	4.51907	5.45542	1.96558e-07	2.73777e-06	6.70656
KEAP1	0.420714	6.07819	5.45248	1.99288e-07	2.7739e-06	6.6933
RBM3	0.555326	7.77057	5.45039	2.01259e-07	2.7994e-06	6.68385
2016-03-01	0.793996	4.49326	5.44883	2.02734e-07	2.81799e-06	6.67683
JAK1	-0.60275	7.00833	-5.44756	2.03948e-07	2.83292e-06	6.67109
CKS2	1.23662	4.71975	5.4474	2.04095e-07	2.83302e-06	6.6704
HLA-DPA1	-1.56034	6.75987	-5.44651	2.04954e-07	2.84299e-06	6.66636
CCDC122	-1.00639	1.77767	-5.44629	2.05162e-07	2.84394e-06	6.66539
CCNJ	0.616165	4.33895	5.44369	2.07681e-07	2.87689e-06	6.65366
GRSF1	0.427794	6.54156	5.44341	2.07952e-07	2.87868e-06	6.65241
ZNF668	0.493026	4.36169	5.44222	2.09117e-07	2.89269e-06	6.64704
ATP5L	0.646144	6.78004	5.44209	2.09249e-07	2.89269e-06	6.64643
SAFB	0.366032	7.34611	5.44082	2.10501e-07	2.90801e-06	6.6407
GPR141	-1.73895	-2.68973	-5.44042	2.10893e-07	2.91145e-06	6.63891
PA2G4	0.498369	7.59056	5.43782	2.13478e-07	2.94513e-06	6.62721
SPATA6	-1.02502	3.40824	-5.43456	2.16763e-07	2.98583e-06	6.61253
SLC25A3	0.46081	8.19211	5.43456	2.16768e-07	2.98583e-06	6.61251
CCL19	-3.48168	3.31821	-5.43446	2.1687e-07	2.98583e-06	6.61206
NCDN	-0.748325	6.46865	-5.43389	2.17445e-07	2.99171e-06	6.60952
LYST	-0.736684	5.36372	-5.43234	2.19035e-07	3.01155e-06	6.60252
PTPRC	-1.71588	4.48559	-5.43168	2.19709e-07	3.01877e-06	6.59957
LINC00337	-1.36582	-2.23663	-5.42911	2.22369e-07	3.05325e-06	6.58801
C16orf82	-2.39839	-3.1757	-5.42878	2.22715e-07	3.05565e-06	6.58651
ZNF90	1.37913	1.88584	5.42863	2.22868e-07	3.05565e-06	6.58585
DHDH	-1.55111	-0.170536	-5.42851	2.22996e-07	3.05565e-06	6.5853
IRF8	-1.45559	4.15483	-5.42579	2.25854e-07	3.09272e-06	6.57307
FAM131B	-0.777398	6.60154	-5.42545	2.26208e-07	3.09548e-06	6.57156
CPT2	-0.502244	4.05107	-5.42393	2.27824e-07	3.11549e-06	6.56472
SNORA18	1.05498	0.815082	5.42095	2.31025e-07	3.15713e-06	6.55132
PILRA	-0.926625	3.51251	-5.42024	2.31796e-07	3.16554e-06	6.54812
KIF3A	-0.636077	6.2865	-5.41831	2.33894e-07	3.19203e-06	6.53946
MTA1	0.614151	7.4916	5.41722	2.35098e-07	3.20631e-06	6.53453
SGCG	1.02458	-0.056093	5.4164	2.35991e-07	3.21417e-06	6.53089
DECR2	0.680832	4.55593	5.4164	2.35991e-07	3.21417e-06	6.53089
ITGAD	-1.90972	0.757836	-5.41611	2.36312e-07	3.21637e-06	6.52958
PIF1	1.28099	3.9539	5.41499	2.37558e-07	3.23117e-06	6.52453
SOS2	-0.513046	5.62279	-5.41466	2.37926e-07	3.234e-06	6.52305
SNRNP40	-0.403316	5.22516	-5.41295	2.39833e-07	3.25471e-06	6.51538
FAM195A	0.833332	3.70398	5.41292	2.39868e-07	3.25471e-06	6.51523
UBAC2	0.428526	5.64671	5.41278	2.40023e-07	3.25471e-06	6.51461
VPS26B	0.527881	6.7357	5.41272	2.40091e-07	3.25471e-06	6.51434
HTATIP2	-1.01318	3.6404	-5.4125	2.40337e-07	3.25586e-06	6.51336
KLF13	-0.529615	6.99547	-5.4123	2.40568e-07	3.25683e-06	6.51243
RPL35	0.92003	8.86333	5.41085	2.422e-07	3.27672e-06	6.50594
MYO7A	-1.13017	4.42313	-5.41	2.43161e-07	3.28753e-06	6.50214
ADAMTS16	1.70249	0.740884	5.40947	2.43769e-07	3.29356e-06	6.49974
DGCR6	-0.822169	4.08976	-5.40838	2.45011e-07	3.30814e-06	6.49486
EFNB3	-1.07883	6.52482	-5.40761	2.45893e-07	3.31783e-06	6.49141
NOL6	0.490935	5.75575	5.40679	2.46838e-07	3.32837e-06	6.48772
RHCE	-1.34605	0.279743	-5.40649	2.47188e-07	3.33087e-06	6.48636
TBC1D30	1.0889	4.83578	5.40629	2.47414e-07	3.33171e-06	6.48548
TSTD1	-1.81795	2.92557	-5.40594	2.47814e-07	3.33488e-06	6.48393
GEMIN8	0.545704	4.18376	5.40435	2.4967e-07	3.35763e-06	6.47677
WRAP73	-0.473513	4.39768	-5.40061	2.54058e-07	3.41438e-06	6.46003
ZNF330	0.449936	5.12497	5.39767	2.5757e-07	3.45929e-06	6.44684
AMOTL2	1.00043	5.53922	5.397	2.5838e-07	3.46787e-06	6.44383
RAF1	0.542622	6.80068	5.39626	2.59274e-07	3.47756e-06	6.44051
MARS2	0.709672	2.47542	5.39591	2.59699e-07	3.47982e-06	6.43894
ELOVL6	0.758494	3.75973	5.39584	2.59786e-07	3.47982e-06	6.43862
NUB1	-0.404242	6.4755	-5.39378	2.62288e-07	3.51102e-06	6.42941
GJC1	0.958407	6.07031	5.39301	2.63232e-07	3.52133e-06	6.42596
IGSF1	-1.95867	2.84956	-5.38792	2.69555e-07	3.60202e-06	6.40317
EIF2S2	0.458658	6.45176	5.38782	2.69681e-07	3.60202e-06	6.40272
PRDM5	1.30875	1.69087	5.38773	2.69797e-07	3.60202e-06	6.40231
PDSS1	0.713239	2.69285	5.38724	2.7041e-07	3.60784e-06	6.40013
C12orf45	0.740886	2.83097	5.38604	2.71921e-07	3.62561e-06	6.39477
CAPG	-1.50916	4.70993	-5.38449	2.73892e-07	3.6495e-06	6.38784
REEP5	-0.686366	7.01091	-5.38383	2.74745e-07	3.65846e-06	6.38485
BECN1	-0.457709	5.28451	-5.38303	2.75771e-07	3.66971e-06	6.38127
DNAI1	-1.38875	-0.123744	-5.38116	2.78173e-07	3.69925e-06	6.37294
GPR98	-2.30484	2.03976	-5.37987	2.79858e-07	3.71922e-06	6.36714
VAMP1	-0.878138	4.77779	-5.37849	2.81665e-07	3.74077e-06	6.36097
KIAA0020	0.659096	4.4424	5.37747	2.82997e-07	3.75601e-06	6.35643
KRT36	-1.68119	-3.47564	-5.37673	2.83981e-07	3.7666e-06	6.3531
TPPP	-0.896597	5.78219	-5.37523	2.85962e-07	3.7904e-06	6.34643
SHISA3	2.22741	0.548584	5.37468	2.86704e-07	3.79775e-06	6.34394
SULF2	0.967709	6.74744	5.3739	2.87744e-07	3.80903e-06	6.34046
HSD17B6	1.51012	0.222919	5.37279	2.89226e-07	3.82369e-06	6.33553
HADH	0.513762	5.35657	5.37279	2.89228e-07	3.82369e-06	6.33552
NAP1L1	0.636798	8.95487	5.3726	2.89481e-07	3.82455e-06	6.33468
PPL	-2.04705	3.59555	-5.37206	2.9021e-07	3.83168e-06	6.33227
HMGB3	1.07376	5.91082	5.37141	2.9109e-07	3.84079e-06	6.32936
TEP1	-0.998137	4.28022	-5.37127	2.91287e-07	3.8409e-06	6.32871
COL19A1	-1.78972	-0.263726	-5.36952	2.93664e-07	3.86972e-06	6.32091
UBE2H	-0.482049	7.5349	-5.36869	2.94797e-07	3.88213e-06	6.31721
E2F3	0.894033	4.88537	5.3679	2.95888e-07	3.89276e-06	6.31366
TRIT1	-0.502464	4.9008	-5.36783	2.95988e-07	3.89276e-06	6.31334
SLC35G1	1.12757	-0.604838	5.36624	2.98182e-07	3.91867e-06	6.30625
RPL19	0.699341	10.4665	5.36612	2.98345e-07	3.91867e-06	6.30572
MBD3	0.506378	6.92098	5.36445	3.00667e-07	3.94662e-06	6.29828
LYG2	1.23017	-1.41614	5.36404	3.01246e-07	3.95166e-06	6.29643
CLEC4F	2.37519	0.124549	5.3631	3.02564e-07	3.96432e-06	6.29224
SYNPR	-2.36998	1.11864	-5.36307	3.02602e-07	3.96432e-06	6.29212
SCML1	0.751906	4.38735	5.36161	3.04667e-07	3.98879e-06	6.28559
PKD1L2	-1.89686	-0.526501	-5.36136	3.05026e-07	3.99092e-06	6.28446
TAS2R31	1.1611	-0.120361	5.36047	3.06286e-07	4.00482e-06	6.2805
CRIP2	-0.746007	7.29544	-5.36031	3.06508e-07	4.00514e-06	6.27981
SNORA71C	1.55635	-1.75454	5.35969	3.07401e-07	4.01422e-06	6.27701
ATP1B1	-0.881562	7.44644	-5.3595	3.07667e-07	4.01511e-06	6.27619
SYT4	-1.04756	6.78847	-5.35851	3.09087e-07	4.03095e-06	6.27176
ABHD13	-0.548959	4.58523	-5.35838	3.09278e-07	4.03095e-06	6.27117
CALM2	-0.545937	9.84159	-5.35814	3.09611e-07	4.03175e-06	6.27014
LYSMD3	-0.528635	3.99106	-5.35806	3.09737e-07	4.03175e-06	6.26975
MRPL30	0.499593	5.67197	5.35696	3.11313e-07	4.04966e-06	6.26487
DCP1A	0.540338	5.46473	5.35608	3.12586e-07	4.06362e-06	6.26095
CDK10	0.574612	6.42389	5.35502	3.14139e-07	4.08119e-06	6.2562
MYOZ3	1.34467	1.84509	5.35412	3.15455e-07	4.09566e-06	6.25219
SHMT2	0.806505	6.54703	5.35235	3.1805e-07	4.12671e-06	6.24432
TEX15	2.18622	0.793836	5.35121	3.19739e-07	4.14598e-06	6.23923
DIRAS2	-1.62286	3.54786	-5.35034	3.2103e-07	4.16006e-06	6.23537
DLX6-AS1	2.32022	-3.393	5.34797	3.2458e-07	4.20337e-06	6.22481
CHTF18	0.946436	5.94377	5.34638	3.26986e-07	4.23182e-06	6.21772
IGIP	-0.686123	4.47373	-5.34606	3.27473e-07	4.23542e-06	6.21629
NRARP	1.06252	3.624	5.34592	3.27691e-07	4.23555e-06	6.21565
RRN3P3	0.429157	1.83344	5.34468	3.29574e-07	4.25717e-06	6.21015
GNS	-0.573914	6.95922	-5.34267	3.32659e-07	4.29417e-06	6.20121
ZIC2	2.74847	-5.24061	5.34254	3.32862e-07	4.29417e-06	6.20062
PRRG1	1.20154	2.09426	5.34229	3.33241e-07	4.29633e-06	6.19953
KLHL14	-2.60385	1.50175	-5.34203	3.33648e-07	4.29884e-06	6.19836
POLR3E	0.349726	5.51505	5.3415	3.34465e-07	4.30663e-06	6.19601
UBE4B	-0.450238	6.26608	-5.3401	3.36655e-07	4.33208e-06	6.18975
EFCAB7	-0.618165	3.64479	-5.33957	3.37473e-07	4.33985e-06	6.18742
TRIM55	-2.36652	1.24552	-5.33879	3.38704e-07	4.35293e-06	6.18392
TIMM50	0.370892	5.66392	5.33799	3.39955e-07	4.36624e-06	6.18038
PTPRVP	1.56413	1.07819	5.33544	3.43993e-07	4.4153e-06	6.16905
PLEKHG3	0.891467	4.71602	5.33209	3.4938e-07	4.48161e-06	6.15414
LAYN	1.23443	3.32209	5.32775	3.56467e-07	4.56721e-06	6.13486
SLC26A8	-1.73853	-1.3588	-5.32773	3.56503e-07	4.56721e-06	6.13476
PANK4	-0.473897	5.06211	-5.32485	3.61291e-07	4.62562e-06	6.12196
ACOX3	0.488063	3.79682	5.32463	3.61658e-07	4.62739e-06	6.12099
MORN1	-0.726891	2.97637	-5.3223	3.65579e-07	4.67394e-06	6.11064
FGF8	1.38007	-2.45046	5.32219	3.65757e-07	4.67394e-06	6.11017
EGFEM1P	2.17661	-3.31184	5.31943	3.70464e-07	4.73111e-06	6.0979
L1TD1	-1.75103	-0.780196	-5.31857	3.71936e-07	4.74693e-06	6.09409
XPO5	0.550224	6.54084	5.31786	3.73147e-07	4.75939e-06	6.09097
PRSS12	2.36912	3.43243	5.31429	3.79361e-07	4.8356e-06	6.07513
HS3ST5	-1.89803	2.91492	-5.31245	3.82603e-07	4.87238e-06	6.06696
APLP1	-0.727772	8.20452	-5.31238	3.82727e-07	4.87238e-06	6.06665
RSPH9	-1.44537	1.38137	-5.31062	3.85845e-07	4.90899e-06	6.05886
GPR132	-1.54063	1.126	-5.30941	3.88012e-07	4.93347e-06	6.05349
ADAMTS10	1.36226	5.38791	5.30572	3.9468e-07	5.01511e-06	6.03714
SYT11	-0.614297	8.83529	-5.30542	3.95224e-07	5.01888e-06	6.03582
C1orf177	-1.36132	-4.30397	-5.30499	3.96012e-07	5.02574e-06	6.03391
NRP1	-0.938083	7.22881	-5.30374	3.98303e-07	5.0499e-06	6.02837
HSD17B3	-1.95713	0.744516	-5.30368	3.98414e-07	5.0499e-06	6.0281
TMEM57	-0.439053	6.07873	-5.30291	3.99834e-07	5.06473e-06	6.02469
NTSR2	-2.27864	-3.15038	-5.30257	4.00468e-07	5.0696e-06	6.02317
IL4I1	-1.68029	2.26382	-5.30207	4.01385e-07	5.07748e-06	6.02098
NHLH2	3.85031	-0.290827	5.30196	4.01592e-07	5.07748e-06	6.02048
PRR18	2.56312	-2.36779	5.30035	4.04581e-07	5.11209e-06	6.01337
ATP6V0E2	-0.749664	7.35007	-5.29988	4.05469e-07	5.12012e-06	6.01126
TMEM18	0.432675	5.37431	5.29744	4.10057e-07	5.17484e-06	6.00047
RASGEF1C	-2.48528	0.783027	-5.29723	4.1044e-07	5.17645e-06	5.99957
TRNT1	0.613785	3.86833	5.29618	4.12443e-07	5.19847e-06	5.9949
C21orf91	0.998764	3.54319	5.29584	4.13094e-07	5.20345e-06	5.99339
SERPINB6	-0.790957	6.25073	-5.29494	4.1481e-07	5.22182e-06	5.98941
FAM35A	0.46292	4.98105	5.29312	4.18305e-07	5.26255e-06	5.98136
DPAGT1	0.468588	4.92329	5.29204	4.20389e-07	5.28549e-06	5.97659
KCTD2	-0.534381	7.05295	-5.29128	4.21873e-07	5.30086e-06	5.97321
PTGIS	1.43232	3.95543	5.29008	4.24197e-07	5.32676e-06	5.96794
CBX7	-0.969951	5.24646	-5.2899	4.24549e-07	5.32694e-06	5.96715
PYGO2	-0.432527	6.50612	-5.28975	4.24853e-07	5.32694e-06	5.96646
KIAA0226	-0.452336	5.68155	-5.28967	4.24999e-07	5.32694e-06	5.96613
CEP57	0.731087	5.69619	5.28928	4.25768e-07	5.33327e-06	5.9644
PPP1R36	-1.23452	-1.67805	-5.28899	4.26336e-07	5.33709e-06	5.96312
TOP3B	0.518345	5.06439	5.2885	4.27311e-07	5.346e-06	5.96092
HPS4	0.401131	6.30676	5.28692	4.30428e-07	5.38168e-06	5.95395
FPR3	-1.23724	3.29343	-5.28548	4.33289e-07	5.41195e-06	5.9476
PPAT	0.724992	4.74999	5.28543	4.33383e-07	5.41195e-06	5.94739
TIRAP	0.597197	2.91797	5.28479	4.34667e-07	5.42464e-06	5.94455
SEH1L	0.549577	5.5698	5.28268	4.3891e-07	5.47423e-06	5.93523
SKAP1	-1.76311	0.801869	-5.28254	4.39191e-07	5.47436e-06	5.93462
MOK	-0.705149	4.17249	-5.28124	4.41824e-07	5.49911e-06	5.92888
CEP19	-0.633369	2.74901	-5.28124	4.41826e-07	5.49911e-06	5.92888
FAM60A	0.961625	6.13582	5.28116	4.4199e-07	5.49911e-06	5.92852
GCAT	0.883037	2.99036	5.27985	4.44673e-07	5.52593e-06	5.92272
RPL24	0.886182	9.12057	5.27984	4.4469e-07	5.52593e-06	5.92268
C3AR1	-1.36742	2.67562	-5.27839	4.4767e-07	5.55955e-06	5.91627
LRTM1	-1.51706	-4.30806	-5.27618	4.52246e-07	5.61295e-06	5.90652
GABBR1	-0.699606	7.86828	-5.27527	4.54141e-07	5.63301e-06	5.90251
RPL27A	0.77414	9.79001	5.27474	4.55238e-07	5.64317e-06	5.90019
EBF1	-1.11598	6.74369	-5.27197	4.61088e-07	5.7122e-06	5.88795
GTPBP3	0.421645	5.49579	5.27037	4.64478e-07	5.75068e-06	5.88092
CPXM1	1.28397	7.11636	5.26982	4.65661e-07	5.75895e-06	5.87848
EIF5A	0.538473	8.34331	5.2698	4.65714e-07	5.75895e-06	5.87837
UROD	-0.505085	5.99615	-5.26887	4.6769e-07	5.77986e-06	5.87431
ABCB6	0.563915	5.77765	5.26826	4.69004e-07	5.79257e-06	5.87162
HOXD9	1.52997	4.71647	5.2674	4.7086e-07	5.81196e-06	5.86783
SLC24A2	-2.54838	0.362784	-5.26724	4.71217e-07	5.81283e-06	5.8671
ATP6V0D1	-0.612381	6.90912	-5.26636	4.73136e-07	5.83295e-06	5.86321
ANP32A	0.655019	7.24699	5.26461	4.76948e-07	5.87637e-06	5.85551
PIP5KL1	-0.817081	2.99763	-5.2643	4.77631e-07	5.88121e-06	5.85414
SUPV3L1	0.398816	5.10566	5.26315	4.80156e-07	5.90872e-06	5.84908
OSGEPL1	0.6733	3.87527	5.26246	4.81678e-07	5.92385e-06	5.84604
ABCB4	-1.36006	1.60379	-5.25945	4.88388e-07	6.00273e-06	5.83278
TRIM37	-0.512923	6.62176	-5.25687	4.94202e-07	6.07051e-06	5.82143
DSCR4	2.11707	-5.54379	5.2547	4.99145e-07	6.12752e-06	5.81188
RPL13AP6	1.31102	-1.05127	5.25385	5.0111e-07	6.14792e-06	5.80811
LRRC73	-0.926273	2.12266	-5.25189	5.05635e-07	6.19968e-06	5.79949
HNRNPM	0.402265	8.16362	5.25167	5.06141e-07	6.20214e-06	5.79853
CAMK2N1	-1.04676	5.76111	-5.24959	5.10997e-07	6.25786e-06	5.78938
TP53I11	0.869714	6.02259	5.2494	5.11427e-07	6.25935e-06	5.78857
ZNF135	0.733206	4.87953	5.24808	5.14529e-07	6.29352e-06	5.78277
TXNIP	-0.830925	8.09888	-5.24734	5.16292e-07	6.31127e-06	5.77949
PDGFRA	1.75787	4.24415	5.24711	5.16839e-07	6.31415e-06	5.77848
FGD6	-0.936684	4.38262	-5.2451	5.21621e-07	6.36874e-06	5.76964
KRT17	-2.16362	1.6545	-5.24379	5.2475e-07	6.40309e-06	5.76391
BIN2	-1.33736	3.10088	-5.24333	5.25855e-07	6.41271e-06	5.76189
HRH3	1.87935	2.92283	5.24226	5.28454e-07	6.44004e-06	5.75717
TESPA1	-1.89629	0.886523	-5.24214	5.28731e-07	6.44004e-06	5.75666
NMU	2.76379	-0.517357	5.2399	5.34184e-07	6.50256e-06	5.74682
NHSL1	1.25523	2.56054	5.23893	5.36567e-07	6.52764e-06	5.74256
HMSD	-1.94506	-3.20054	-5.23841	5.3784e-07	6.5392e-06	5.74028
C11orf73	0.558104	4.89937	5.23824	5.3827e-07	6.54051e-06	5.73952
CEP72	0.905837	3.48013	5.23673	5.41992e-07	6.5818e-06	5.73291
NKPD1	1.40782	-0.479008	5.23629	5.43092e-07	6.5912e-06	5.73097
BAI2	-0.812932	7.32153	-5.23551	5.45045e-07	6.61096e-06	5.72752
THEMIS	-2.29431	-1.16486	-5.23297	5.51406e-07	6.68411e-06	5.7164
ZDHHC22	1.59764	2.53484	5.23274	5.51996e-07	6.68726e-06	5.71537
AIF1	-1.22673	4.35589	-5.23231	5.53087e-07	6.69648e-06	5.71348
ZNF362	-0.440951	6.2638	-5.23119	5.55914e-07	6.72596e-06	5.70859
CDK4	0.543815	6.92688	5.23109	5.56185e-07	6.72596e-06	5.70813
TRAPPC5	0.656336	4.97361	5.22986	5.59313e-07	6.75618e-06	5.70275
SNTA1	-0.624502	4.43363	-5.22985	5.5935e-07	6.75618e-06	5.70269
ZER1	-0.455995	6.57401	-5.22961	5.59952e-07	6.75942e-06	5.70165
EED	0.559464	4.05461	5.22919	5.61037e-07	6.76849e-06	5.6998
SLC25A38	0.481277	4.9987	5.22491	5.72125e-07	6.89816e-06	5.68104
FNDC5	-1.3458	5.39688	-5.22459	5.7296e-07	6.90412e-06	5.67964
PAPD7	0.470692	6.35846	5.22404	5.74412e-07	6.9175e-06	5.67721
RIT2	-1.92955	0.614693	-5.22297	5.77231e-07	6.94732e-06	5.67252
MTFR1	0.49111	3.29369	5.22222	5.79215e-07	6.96707e-06	5.66923
PDCD1LG2	-1.10872	0.751643	-5.22208	5.79574e-07	6.96725e-06	5.66863
SLC20A1	0.469567	6.47681	5.22187	5.80123e-07	6.96972e-06	5.66773
SH3D21	-0.873063	2.38592	-5.22104	5.82348e-07	6.99013e-06	5.66406
TRAPPC6A	0.839575	3.35445	5.22097	5.82511e-07	6.99013e-06	5.66379
IRX6	2.67337	-1.37839	5.21987	5.85463e-07	7.02141e-06	5.65894
RAB33A	0.717469	3.86888	5.21709	5.92939e-07	7.10686e-06	5.64678
TSEN2	0.531711	3.23076	5.21608	5.9568e-07	7.13549e-06	5.64236
AK2	-0.299063	6.82068	-5.2156	5.96987e-07	7.14693e-06	5.64026
GSTK1	-0.646318	6.01098	-5.2145	6.00009e-07	7.17886e-06	5.63542
POLR1D	0.572168	6.51265	5.2129	6.04398e-07	7.22712e-06	5.62843
MAL	-2.81394	0.755008	-5.21235	6.05917e-07	7.23706e-06	5.62602
RAVER1	0.47739	6.17949	5.21234	6.05943e-07	7.23706e-06	5.62598
STARD3NL	-0.478755	6.18116	-5.21204	6.06788e-07	7.24288e-06	5.62465
POLE3	0.530586	6.20315	5.21176	6.07548e-07	7.24769e-06	5.62345
CD40LG	-2.21652	-1.13034	-5.20975	6.13151e-07	7.31023e-06	5.61465
FGF5	2.58505	-2.95436	5.20788	6.18396e-07	7.36843e-06	5.60648
DZIP1	0.73154	5.81263	5.2055	6.25153e-07	7.44457e-06	5.59607
C2orf73	-1.49983	-2.97544	-5.20364	6.30487e-07	7.50368e-06	5.58792
TMEM56	-0.962631	2.87013	-5.20321	6.31719e-07	7.51394e-06	5.58605
CCDC51	0.574654	3.63942	5.20278	6.32959e-07	7.52427e-06	5.58417
LAIR1	-1.28795	4.05664	-5.20116	6.37661e-07	7.57573e-06	5.57708
LARS2	0.528873	4.36771	5.19996	6.41161e-07	7.61285e-06	5.57183
ST3GAL3	-0.475008	4.93957	-5.19631	6.51904e-07	7.73587e-06	5.55591
HCFC1	0.447212	7.25977	5.19581	6.53402e-07	7.74911e-06	5.55371
PLEKHM2	-0.541616	6.71527	-5.19439	6.57639e-07	7.7948e-06	5.54751
POP1	0.634398	3.44237	5.19357	6.60091e-07	7.81931e-06	5.54395
CRYZ	-0.782647	3.84512	-5.19215	6.64385e-07	7.86558e-06	5.53773
TUBB1	-0.85058	2.91743	-5.19145	6.66484e-07	7.88409e-06	5.53471
PTPRQ	-2.21653	-2.50925	-5.19137	6.66726e-07	7.88409e-06	5.53436
NAF1	0.567953	3.05255	5.19124	6.67137e-07	7.88434e-06	5.53377
NOX4	1.26546	1.71826	5.18705	6.79987e-07	8.03153e-06	5.51549
C14orf166	0.5313	6.51975	5.18561	6.84456e-07	8.07961e-06	5.50921
CASP1	-1.11733	3.12761	-5.18457	6.87701e-07	8.11319e-06	5.50468
CLEC9A	-2.15362	-1.23295	-5.18439	6.88278e-07	8.11528e-06	5.50387
NAPB	-0.596249	6.73797	-5.18302	6.92553e-07	8.16093e-06	5.49794
LHPP	-0.944665	3.26929	-5.18228	6.94904e-07	8.18388e-06	5.49469
SYNJ1	-0.537678	5.58917	-5.17988	7.02526e-07	8.26885e-06	5.48424
D2HGDH	0.554462	4.84362	5.17806	7.08352e-07	8.33258e-06	5.47633
ZNF595	0.58349	2.72704	5.17791	7.08843e-07	8.33352e-06	5.47566
ACADS	-0.673413	4.2698	-5.17687	7.12199e-07	8.36676e-06	5.47114
CHST1	-1.21985	6.21571	-5.17678	7.12495e-07	8.36676e-06	5.47074
STK32A	-1.0322	4.63251	-5.17574	7.15883e-07	8.40168e-06	5.46619
MADD	-0.455015	7.51233	-5.17541	7.16939e-07	8.40921e-06	5.46478
MFAP4	1.46729	4.99434	5.17449	7.19961e-07	8.43977e-06	5.46075
HADHA	0.465925	7.73715	5.1741	7.21216e-07	8.4496e-06	5.45908
GAST	-1.90695	-4.01073	-5.17206	7.27957e-07	8.52366e-06	5.45017
KDELR1	0.491094	7.06756	5.17022	7.3406e-07	8.59015e-06	5.44217
BEND4	2.47064	1.69259	5.17009	7.34488e-07	8.59021e-06	5.44161
SELPLG	-1.36624	3.51846	-5.16896	7.38266e-07	8.62941e-06	5.43669
NHP2	0.668445	6.61069	5.16827	7.40587e-07	8.65156e-06	5.43369
TCEB3	-0.379298	5.72939	-5.16788	7.419e-07	8.6619e-06	5.43199
ATRIP	0.469137	3.72856	5.16685	7.45373e-07	8.69745e-06	5.42751
HACE1	-0.570772	5.08447	-5.16643	7.46798e-07	8.70906e-06	5.42569
ZNF121	1.09068	1.88917	5.16619	7.47614e-07	8.71357e-06	5.42464
SSU72	-0.474233	6.23444	-5.16384	7.55623e-07	8.80186e-06	5.41443
FAM134A	-0.436734	7.54228	-5.16282	7.59123e-07	8.83755e-06	5.41
MRPS30	0.551636	3.94757	5.16262	7.59818e-07	8.84057e-06	5.40913
NRGN	1.21885	2.63781	5.16019	7.68248e-07	8.93352e-06	5.39856
RNF44	0.512099	7.29387	5.1595	7.70655e-07	8.95638e-06	5.39556
KIAA2013	-0.485173	5.69852	-5.1583	7.74866e-07	9.00016e-06	5.39034
ATG4A	-0.424503	3.77188	-5.1574	7.78046e-07	9.03192e-06	5.38642
CES4A	-1.03203	4.47235	-5.15708	7.79165e-07	9.03975e-06	5.38504
GLRA4	-1.56177	-2.79984	-5.154	7.90118e-07	9.16157e-06	5.37167
NECAP2	-0.544345	5.41185	-5.15319	7.93036e-07	9.19015e-06	5.36813
C1orf228	-1.08863	3.04341	-5.15166	7.98551e-07	9.24878e-06	5.3615
PTDSS2	0.433166	5.8678	5.15109	8.00605e-07	9.26728e-06	5.35903
SNX24	-0.523617	3.52061	-5.14946	8.06534e-07	9.33058e-06	5.35197
POMGNT1	-0.463462	6.58822	-5.14867	8.09427e-07	9.35871e-06	5.34854
CALY	-1.44514	5.00403	-5.14618	8.18609e-07	9.45949e-06	5.33773
RUSC1	-0.497795	7.00581	-5.14512	8.22537e-07	9.49946e-06	5.33315
ARHGAP32	0.629828	5.1976	5.14299	8.30528e-07	9.58629e-06	5.32389
ZNF684	-0.477698	1.96754	-5.14245	8.32566e-07	9.60435e-06	5.32154
ANP32B	0.626174	7.4108	5.14188	8.34712e-07	9.62363e-06	5.31907
KRT23	-1.83991	-2.41241	-5.13948	8.43816e-07	9.72306e-06	5.30868
CCNJL	-1.01206	3.25483	-5.13802	8.49402e-07	9.78187e-06	5.30236
NUP35	0.601259	4.00566	5.13752	8.51336e-07	9.79857e-06	5.30019
HEATR2	0.569499	4.83729	5.13654	8.55119e-07	9.83653e-06	5.29594
ASAP3	-0.991297	4.18605	-5.13475	8.62067e-07	9.90852e-06	5.28819
TNFRSF10B	1.16083	5.29163	5.13468	8.62354e-07	9.90852e-06	5.28787
LETM1	0.49576	5.79846	5.13394	8.65252e-07	9.93619e-06	5.28466
PCDHA1	-1.19002	1.8193	-5.13359	8.66601e-07	9.94605e-06	5.28317
EIF3H	0.632476	7.73941	5.13237	8.71415e-07	9.99564e-06	5.27786
HOXC6	-1.22851	4.62552	-5.13143	8.75128e-07	1.00326e-05	5.27379
TRAF4	0.576558	5.85767	5.12993	8.8105e-07	1.00947e-05	5.26733
ZNF57	1.00187	1.64753	5.12772	8.899e-07	1.01904e-05	5.25776
FZD2	1.78239	1.96887	5.12707	8.92506e-07	1.02145e-05	5.25496
ZNF565	0.468586	1.81788	5.12677	8.93753e-07	1.0223e-05	5.25362
HAS3	0.703946	2.48787	5.12623	8.9592e-07	1.0242e-05	5.2513
METAP2	0.483829	6.74017	5.12533	8.99584e-07	1.02781e-05	5.24739
BUD13	0.465582	4.42642	5.12344	9.07291e-07	1.03603e-05	5.23922
PGLS	0.5055	5.73682	5.12331	9.07814e-07	1.03604e-05	5.23867
KIAA1731	0.744309	5.09885	5.1224	9.11566e-07	1.03941e-05	5.23472
FZD9	1.51062	-1.67046	5.12234	9.11788e-07	1.03941e-05	5.23449
HIST1H2BH	1.7994	-0.263347	5.12111	9.16868e-07	1.04461e-05	5.22917
NLRP14	-1.63253	-3.22558	-5.11791	9.30207e-07	1.05921e-05	5.21534
ARRDC4	-0.787328	4.77735	-5.11689	9.3452e-07	1.06321e-05	5.21091
KREMEN2	1.13429	1.13177	5.11683	9.34762e-07	1.06321e-05	5.21066
GEMIN4	0.542692	4.79502	5.11639	9.36604e-07	1.0647e-05	5.20878
NOC2L	-0.502882	6.8058	-5.11437	9.45194e-07	1.07387e-05	5.20003
CD53	-1.40014	4.55065	-5.11386	9.47366e-07	1.07573e-05	5.19784
NCKAP1L	-1.27302	3.69419	-5.11355	9.48706e-07	1.07665e-05	5.19648
WDFY4	-1.46788	2.81582	-5.11185	9.56008e-07	1.08433e-05	5.18914
NEUROD1	2.69932	-4.92605	5.11106	9.59416e-07	1.08759e-05	5.18573
GPR6	1.79316	-3.05729	5.11005	9.63759e-07	1.0919e-05	5.18141
SNORA62	0.810437	-0.141852	5.10901	9.6832e-07	1.09646e-05	5.17689
TMBIM6	-0.418822	8.53247	-5.10781	9.73552e-07	1.10177e-05	5.17173
RGS18	-1.27368	0.351781	-5.10685	9.77774e-07	1.10593e-05	5.16759
CPD	-0.437435	6.20719	-5.1024	9.97573e-07	1.12769e-05	5.14839
CDH4	-1.61949	4.90219	-5.09983	1.0092e-06	1.1402e-05	5.1373
HYLS1	0.763382	2.84422	5.0997	1.00979e-06	1.14023e-05	5.13675
NMNAT1	-0.572638	3.06108	-5.09951	1.01063e-06	1.14054e-05	5.13595
IDH3G	0.37237	6.01562	5.09492	1.03175e-06	1.16373e-05	5.11615
CDH26	-0.808535	-0.0075557	-5.09449	1.03374e-06	1.16533e-05	5.1143
UBIAD1	-0.379339	4.0144	-5.09382	1.03689e-06	1.16823e-05	5.11139
PSD2	-0.956209	5.52144	-5.09201	1.04534e-06	1.1771e-05	5.10362
CACNG1	-1.46687	-0.57934	-5.09152	1.04765e-06	1.17905e-05	5.1015
TMEM65	-0.585764	4.83366	-5.09129	1.04873e-06	1.1796e-05	5.10052
ARTN	-0.892007	2.37879	-5.09059	1.05204e-06	1.18267e-05	5.0975
CD47	-0.588339	7.09103	-5.09039	1.05296e-06	1.18305e-05	5.09666
CLEC7A	-1.3257	2.60824	-5.08947	1.05734e-06	1.18731e-05	5.0927
SEMA3D	-2.51766	3.54466	-5.08911	1.05907e-06	1.18859e-05	5.09113
RAB2A	-0.388915	7.06248	-5.08801	1.06432e-06	1.19383e-05	5.0864
CCNE1	0.599259	3.26552	5.08721	1.06817e-06	1.19749e-05	5.08294
SORL1	-0.831988	6.1214	-5.08426	1.08239e-06	1.21276e-05	5.07028
WDR47	-0.586429	5.64004	-5.08253	1.09084e-06	1.22155e-05	5.06284
LONP1	0.488244	6.96866	5.08112	1.09777e-06	1.22853e-05	5.05677
CNNM1	2.49534	1.46826	5.0809	1.09886e-06	1.22853e-05	5.05583
VSTM2L	-1.5922	5.89166	-5.0809	1.09889e-06	1.22853e-05	5.0558
RNF141	-0.518586	5.51575	-5.08002	1.10321e-06	1.23268e-05	5.05204
CENPP	0.676554	1.85761	5.07946	1.10602e-06	1.23513e-05	5.04961
SNORA64	0.844033	-0.209731	5.07821	1.11223e-06	1.24138e-05	5.04425
GATA4	2.2916	-2.50519	5.07734	1.11657e-06	1.24555e-05	5.04052
GALR3	1.39945	-4.15169	5.07458	1.13048e-06	1.26037e-05	5.02868
FAM92B	-1.99403	-1.51021	-5.07425	1.13219e-06	1.26158e-05	5.02723
GALE	-0.461097	4.42362	-5.07252	1.14099e-06	1.27069e-05	5.01982
GLRA2	2.80374	-1.60519	5.07178	1.14477e-06	1.2742e-05	5.01666
ZNF639	0.455242	5.00301	5.07162	1.14564e-06	1.27447e-05	5.01593
DGAT2	1.13558	3.1931	5.07055	1.15112e-06	1.27987e-05	5.01136
CORT	-0.918136	0.290316	-5.0704	1.15191e-06	1.28004e-05	5.01071
HACL1	0.520281	3.45083	5.07026	1.15264e-06	1.28015e-05	5.01009
DAPP1	-1.50305	0.994879	-5.06925	1.15785e-06	1.28524e-05	5.00578
INPP5B	-0.470951	4.75778	-5.06846	1.16198e-06	1.28911e-05	5.00238
ZNF214	-1.53088	0.820986	-5.06778	1.16553e-06	1.29234e-05	4.99945
IGDCC4	1.13304	3.80186	5.06608	1.17445e-06	1.30152e-05	4.99216
RNF126	0.48197	5.33721	5.06554	1.17729e-06	1.30396e-05	4.98984
HDDC2	0.59805	5.30746	5.06398	1.18554e-06	1.31237e-05	4.98317
ZNF280C	0.627716	3.35992	5.06367	1.18718e-06	1.31347e-05	4.98184
C11orf63	-0.767144	2.46292	-5.06319	1.18973e-06	1.31521e-05	4.97979
ARL8A	-0.471996	6.86925	-5.06313	1.19004e-06	1.31521e-05	4.97954
ITK	-1.99878	1.85148	-5.06246	1.19366e-06	1.31849e-05	4.97663
CGREF1	0.755963	4.56621	5.06217	1.19518e-06	1.31945e-05	4.97541
ASB2	-1.38949	0.840387	-5.06133	1.19969e-06	1.32371e-05	4.97181
C6orf106	-0.373187	6.67473	-5.06061	1.20358e-06	1.32728e-05	4.96871
WDYHV1	0.600073	4.21989	5.06033	1.20511e-06	1.32824e-05	4.9675
FAM193A	0.421904	6.03487	5.06006	1.20658e-06	1.32913e-05	4.96633
ZMPSTE24	-0.441375	5.11788	-5.05989	1.20748e-06	1.3294e-05	4.96562
TMCC3	-0.986514	3.81672	-5.05932	1.21055e-06	1.33196e-05	4.96319
CRTAP	0.981018	6.13044	5.05915	1.21149e-06	1.33196e-05	4.96244
BOLA3-AS1	0.63186	4.59071	5.0591	1.21177e-06	1.33196e-05	4.96222
C14orf159	0.493699	5.0887	5.05698	1.2233e-06	1.34391e-05	4.95316
SNORD69	1.0191	-1.81854	5.05659	1.22546e-06	1.34555e-05	4.95147
SPN	-1.696	2.37139	-5.05528	1.23266e-06	1.35253e-05	4.94587
CSRP2BP	0.446404	4.58111	5.05519	1.23315e-06	1.35253e-05	4.94549
HLA-DRA	-1.50952	7.81928	-5.0527	1.24696e-06	1.36694e-05	4.93483
HOOK2	0.53815	5.22749	5.05176	1.25221e-06	1.37195e-05	4.93081
TSNARE1	0.531323	5.23443	5.05041	1.25982e-06	1.37955e-05	4.92501
PAX4	-2.39439	-2.81921	-5.04994	1.26247e-06	1.3817e-05	4.92301
UHMK1	-0.663415	6.17446	-5.04956	1.2646e-06	1.38329e-05	4.92139
SYTL1	-1.6214	2.14035	-5.04852	1.27054e-06	1.38904e-05	4.91691
TMC2	-1.94147	1.43684	-5.04697	1.27936e-06	1.39792e-05	4.91029
FEZ1	1.26174	5.40296	5.04675	1.28059e-06	1.39846e-05	4.90937
ACY1	1.26592	-2.98689	5.04664	1.28123e-06	1.39846e-05	4.90889
GPR153	-0.780034	5.7676	-5.04569	1.28669e-06	1.40366e-05	4.90483
SYK	-1.30178	3.42535	-5.04411	1.29585e-06	1.41289e-05	4.89804
SNCG	-1.80865	3.87535	-5.04225	1.30664e-06	1.4239e-05	4.8901
ADRA2A	-1.68583	3.06626	-5.04213	1.30735e-06	1.4239e-05	4.88959
CD2	-1.9127	1.91203	-5.0415	1.31104e-06	1.42716e-05	4.88689
TLR2	-1.21725	2.66959	-5.0409	1.31457e-06	1.43023e-05	4.88432
B4GALNT3	1.23207	2.4243	5.03691	1.33822e-06	1.45518e-05	4.86726
ENO4	-0.929478	1.93365	-5.03653	1.34046e-06	1.45683e-05	4.86566
PQBP1	0.468905	6.13713	5.03584	1.34461e-06	1.46056e-05	4.8627
APBB1IP	-1.42501	2.71262	-5.03401	1.35566e-06	1.47177e-05	4.85487
TMEM19	-0.552304	4.65934	-5.03339	1.35939e-06	1.47503e-05	4.85225
CLEC10A	-2.08258	1.24554	-5.03167	1.36985e-06	1.48559e-05	4.84491
ZFPM2	-1.07628	4.04512	-5.02925	1.38476e-06	1.50096e-05	4.83456
DUSP22	-0.909974	4.61036	-5.02707	1.39825e-06	1.51431e-05	4.82528
KIAA1958	0.840469	3.37115	5.02702	1.39857e-06	1.51431e-05	4.82506
PAPSS1	0.446567	6.08614	5.02636	1.40273e-06	1.518e-05	4.82223
SYVN1	-0.442241	6.30907	-5.026	1.40498e-06	1.51962e-05	4.82069
TRAPPC6B	-0.475773	5.63371	-5.02438	1.41515e-06	1.52982e-05	4.81379
ANAPC7	0.466023	6.53234	5.02333	1.42178e-06	1.53615e-05	4.80933
MANEAL	-0.67096	6.22916	-5.02286	1.42477e-06	1.53856e-05	4.80732
IFNA21	-1.66565	-3.99901	-5.02178	1.43164e-06	1.54517e-05	4.80271
NXPH3	-1.87442	1.88863	-5.02152	1.4333e-06	1.54613e-05	4.80161
ANKRD13B	0.74613	7.20903	5.02062	1.43907e-06	1.55094e-05	4.79776
OGFRL1	-0.937442	2.94838	-5.02059	1.43928e-06	1.55094e-05	4.79762
DNAJB2	-0.525704	7.45711	-5.02001	1.443e-06	1.55396e-05	4.79515
AFMID	0.535692	5.05201	5.01991	1.44362e-06	1.55396e-05	4.79474
ANXA7	-0.674932	5.85207	-5.01854	1.45246e-06	1.56265e-05	4.7889
ROGDI	-0.497748	5.71224	-5.01753	1.45902e-06	1.56887e-05	4.78459
DCPS	0.562493	3.51959	5.01705	1.46214e-06	1.57139e-05	4.78255
GTF2E2	0.482005	4.5441	5.01474	1.47725e-06	1.5868e-05	4.77271
RPL29P2	1.25816	-4.78434	5.01418	1.481e-06	1.58998e-05	4.77029
RLF	-0.522114	5.20509	-5.01319	1.48752e-06	1.59613e-05	4.76609
SHOC2	-0.469132	5.46538	-5.01297	1.48898e-06	1.59686e-05	4.76515
KIF26A	1.1436	6.8001	5.01264	1.49118e-06	1.59837e-05	4.76374
RNASEH2A	0.971842	5.14953	5.0112	1.50078e-06	1.60781e-05	4.7576
CPNE9	-1.14628	2.26208	-5.01018	1.5076e-06	1.61426e-05	4.75327
UCKL1	0.432038	6.3924	5.00946	1.51241e-06	1.61807e-05	4.75022
CACNG2	-1.44997	4.43786	-5.00938	1.51293e-06	1.61807e-05	4.74989
DHRS1	-0.552092	4.548	-5.00929	1.51355e-06	1.61807e-05	4.74951
IDS	-0.697205	8.29034	-5.00886	1.51649e-06	1.62036e-05	4.74765
TRAT1	-1.99487	-0.864431	-5.00799	1.52235e-06	1.62577e-05	4.74396
RHOBTB1	0.658433	4.70428	5.00698	1.52918e-06	1.6322e-05	4.73968
ACTG1	0.635121	11.9246	5.00538	1.54016e-06	1.64305e-05	4.73284
ATP6V0A1	-0.623925	8.20245	-5.0039	1.55027e-06	1.65297e-05	4.72658
EFCAB5	-1.14417	0.678099	-5.00358	1.55251e-06	1.65448e-05	4.7252
CARTPT	-3.23805	2.02432	-5.00311	1.55575e-06	1.65707e-05	4.7232
NR2F1	1.43489	4.62807	5.00252	1.55981e-06	1.66053e-05	4.72071
VSTM2A	-1.5559	6.47296	-5.00231	1.56127e-06	1.66121e-05	4.71982
CD69	-2.16926	1.61823	-5.00039	1.57468e-06	1.67459e-05	4.71164
CD74	-1.49643	9.34123	-4.99896	1.58473e-06	1.6844e-05	4.70556
DUSP16	0.615619	6.27842	4.99868	1.58667e-06	1.68543e-05	4.70439
ASB13	0.83209	4.59141	4.99859	1.58736e-06	1.68543e-05	4.70397
SERINC2	-1.66029	2.83162	-4.99746	1.59533e-06	1.69301e-05	4.69918
SNTG1	2.80579	-3.71671	4.99604	1.60544e-06	1.70284e-05	4.69314
EIF4E1B	-1.96396	-1.85417	-4.99547	1.60953e-06	1.70628e-05	4.69071
GLIS3-AS1	-1.66442	-3.98936	-4.99496	1.61317e-06	1.70925e-05	4.68855
CADPS	-0.892792	6.59064	-4.99479	1.61438e-06	1.70964e-05	4.68783
SLC6A12	-1.18625	1.33001	-4.99059	1.6448e-06	1.74095e-05	4.66999
HCRT	-2.06829	-0.978157	-4.98896	1.65671e-06	1.75174e-05	4.66309
KIAA1045	-1.99608	2.75618	-4.98896	1.65673e-06	1.75174e-05	4.66308
PSMC2	-0.398544	6.52847	-4.98823	1.66207e-06	1.75648e-05	4.66
KLHL6	-1.21988	2.88599	-4.98726	1.66927e-06	1.76289e-05	4.65587
KIAA1841	-0.631309	5.02783	-4.98718	1.66988e-06	1.76289e-05	4.65552
CYTIP	-1.5329	2.23989	-4.9863	1.67636e-06	1.76881e-05	4.65182
OPHN1	-0.712902	3.54197	-4.98516	1.68487e-06	1.77668e-05	4.64698
ARHGEF2	0.506836	6.4839	4.98507	1.68557e-06	1.77668e-05	4.64658
TMEM192	0.50819	4.19948	4.98478	1.68771e-06	1.77802e-05	4.64536
TMEM53	-0.728012	2.17327	-4.98066	1.71887e-06	1.80915e-05	4.62787
GART	0.455702	5.86844	4.98063	1.71905e-06	1.80915e-05	4.62778
STOML2	0.454587	6.3572	4.9805	1.72006e-06	1.80927e-05	4.62722
TRIM69	-0.980731	1.22941	-4.97891	1.73226e-06	1.82117e-05	4.62046
CNTN4-AS1	1.42187	-5.22774	4.9743	1.76802e-06	1.8578e-05	4.60093
POF1B	-2.51883	0.0960971	-4.97213	1.78505e-06	1.87439e-05	4.59176
CPSF4L	-1.41022	-2.30811	-4.97206	1.78566e-06	1.87439e-05	4.59143
KLHL29	-0.681295	4.97862	-4.97024	1.80012e-06	1.88859e-05	4.58373
NAPSB	-1.59417	2.6235	-4.96964	1.8049e-06	1.89263e-05	4.58119
CASP8	-0.999573	3.01108	-4.96782	1.81951e-06	1.90696e-05	4.57349
GOLGA8J	-1.16172	-2.31117	-4.96763	1.82098e-06	1.90752e-05	4.57271
LSM10	-0.553534	4.45738	-4.9669	1.82691e-06	1.91273e-05	4.56961
BPIFC	-1.60266	-3.4001	-4.96421	1.84879e-06	1.93464e-05	4.55823
GDPD5	-0.818012	5.33487	-4.96406	1.85002e-06	1.93493e-05	4.5576
MIR218-2	1.92881	-2.24435	4.96278	1.8605e-06	1.94489e-05	4.55219
NFYA	0.493438	5.6143	4.96162	1.8701e-06	1.95392e-05	4.54728
KIAA1279	-0.480325	5.22544	-4.96028	1.88118e-06	1.96375e-05	4.54163
MPP2	-0.763636	6.77043	-4.96025	1.88144e-06	1.96375e-05	4.5415
C5orf49	-1.04393	0.324113	-4.95945	1.88814e-06	1.96973e-05	4.5381
WIPF1	-0.93633	5.58723	-4.95859	1.89533e-06	1.97621e-05	4.53447
ZMYND10	0.890536	2.10107	4.95804	1.89997e-06	1.9795e-05	4.53213
GFI1	-1.64019	-0.0352375	-4.95798	1.90044e-06	1.9795e-05	4.5319
DTD1	0.52436	6.26619	4.95624	1.91513e-06	1.99378e-05	4.52454
NUDT5	0.435288	4.21733	4.95253	1.94674e-06	2.02565e-05	4.50889
IL15	-1.17252	1.85925	-4.95202	1.95119e-06	2.02924e-05	4.50671
MAPRE3	-0.58263	6.72097	-4.95172	1.95371e-06	2.03081e-05	4.50548
C12orf49	-0.54975	4.91007	-4.95158	1.95492e-06	2.03104e-05	4.50488
EHMT2	0.507011	7.37426	4.94979	1.97046e-06	2.04613e-05	4.49732
RAP1GAP2	-0.893771	7.80085	-4.9464	2.00021e-06	2.07596e-05	4.483
WDR27	0.661023	5.16037	4.94503	2.01233e-06	2.08747e-05	4.47723
PUM1	-0.321963	6.97941	-4.94305	2.02994e-06	2.10466e-05	4.4689
ATP2A3	-1.28578	4.86425	-4.94227	2.03696e-06	2.11086e-05	4.46561
PCBP2	0.483357	9.34023	4.94208	2.03866e-06	2.11154e-05	4.46481
NDNF	2.4335	-2.45566	4.94163	2.04273e-06	2.11429e-05	4.4629
MFSD3	0.522073	4.31298	4.94156	2.0434e-06	2.11429e-05	4.46259
ATG16L1	-0.384274	5.71226	-4.94049	2.05302e-06	2.12317e-05	4.4581
TMEM62	-0.391333	4.49937	-4.94014	2.05622e-06	2.12539e-05	4.45661
KIAA1468	-0.487577	5.5842	-4.93981	2.05917e-06	2.12736e-05	4.45524
ZSWIM5	-0.769349	4.66916	-4.9397	2.06022e-06	2.12736e-05	4.45476
PLXNC1	-1.05525	5.8137	-4.93943	2.06261e-06	2.12874e-05	4.45365
GDAP1L1	0.944409	7.09408	4.93798	2.07587e-06	2.14053e-05	4.44753
MZF1	0.546587	5.63716	4.93795	2.07615e-06	2.14053e-05	4.4474
CLN5	-0.511425	4.53554	-4.93736	2.08154e-06	2.14501e-05	4.44492
PRPH2	-1.87571	2.90433	-4.93688	2.08601e-06	2.14852e-05	4.44287
CNIH2	-0.820249	5.48281	-4.93667	2.08786e-06	2.14933e-05	4.44202
KLHDC4	0.403578	4.48771	4.93637	2.0907e-06	2.15116e-05	4.44072
SESN3	-0.908433	7.03024	-4.93414	2.11129e-06	2.17124e-05	4.43136
LIN52	-0.562555	3.61304	-4.93365	2.11591e-06	2.17489e-05	4.42927
DCDC2C	-1.51442	-2.75872	-4.93226	2.12888e-06	2.18711e-05	4.42344
TEX26	-2.16154	-3.78861	-4.93194	2.1319e-06	2.18911e-05	4.42208
ADRB2	-1.86608	1.42196	-4.93145	2.13647e-06	2.19269e-05	4.42004
VAMP2	-0.513056	8.28633	-4.93059	2.14461e-06	2.19993e-05	4.4164
NUAK2	-0.868463	2.46586	-4.93042	2.14621e-06	2.20046e-05	4.41569
SLCO2B1	-1.25739	5.15344	-4.93018	2.14852e-06	2.20172e-05	4.41466
CELF2	-0.881193	5.77273	-4.93002	2.14996e-06	2.20208e-05	4.41402
ERGIC3	0.459878	7.72851	4.92961	2.15384e-06	2.20494e-05	4.4123
CEP152	1.13424	3.8744	4.92907	2.159e-06	2.20911e-05	4.41001
RPL38	0.807167	9.34628	4.92879	2.16169e-06	2.21075e-05	4.40882
PDK2	-0.610005	6.16038	-4.92812	2.16811e-06	2.21619e-05	4.40599
RIMS1	-1.00206	3.9511	-4.92603	2.18813e-06	2.23553e-05	4.39721
BBS9	-0.422515	4.27418	-4.92543	2.19386e-06	2.24025e-05	4.39471
CACNA2D3-AS1	-1.86134	-2.30826	-4.92318	2.21574e-06	2.26057e-05	4.38523
HEATR4	0.669979	0.636721	4.92315	2.21598e-06	2.26057e-05	4.38513
CCDC129	-1.85765	-3.71906	-4.92301	2.21742e-06	2.2609e-05	4.38451
NXF5	-1.49029	-3.12928	-4.92272	2.22025e-06	2.26265e-05	4.38329
XCL1	-1.98008	0.0237362	-4.92131	2.23402e-06	2.27554e-05	4.37738
GOLT1A	-1.80134	-0.988981	-4.92082	2.23881e-06	2.27928e-05	4.37534
HDAC1	-0.474904	6.36113	-4.92005	2.24642e-06	2.28587e-05	4.3721
LINC00493	0.593775	4.57196	4.91958	2.25108e-06	2.28833e-05	4.37012
NPL	-0.937351	3.88668	-4.91947	2.25217e-06	2.28833e-05	4.36965
GADD45GIP1	0.558868	5.45714	4.91947	2.25222e-06	2.28833e-05	4.36963
LIPT2	0.81594	0.378101	4.9171	2.27575e-06	2.31107e-05	4.35971
RAD18	0.709705	4.30088	4.91589	2.28794e-06	2.32222e-05	4.35461
ZNF492	1.6322	0.454473	4.91578	2.28901e-06	2.32222e-05	4.35416
[truncated: 18,281 more rows]

## Sheet: TM List
hgnc_symbol	isTM	isTM.Compartments	isECR.Compartments	isTM.TOPCONS	Number.of.predicted.TMHs.TMHMM	Total.prob.of.N.in.TMHMM
AAK1	Yes	Yes	No	No	NA	NA
AAMP	Yes	Yes	No	No	NA	NA
ABCA1	Yes	Yes	No	No	NA	NA
ABCA2	Yes	Yes	No	No	NA	NA
ABCA3	Yes	Yes	Yes	Yes	11	0.97622
ABCA4	Yes	Yes	No	No	NA	NA
ABCA7	Yes	Yes	No	No	NA	NA
ABCA8	Yes	Yes	No	No	NA	NA
ABCB4	Yes	Yes	Yes	Yes	11	0.93909
ABCB5	Yes	Yes	No	No	NA	NA
ABCB6	Yes	Yes	Yes	Yes	3	0.91619
ABCB8	Yes	Yes	No	No	NA	NA
ABCC11	Yes	Yes	Yes	Yes	11	0.98247
ABCC2	Yes	Yes	No	No	NA	NA
ABCC4	Yes	Yes	No	No	NA	NA
ABCC6	Yes	Yes	No	No	NA	NA
ABCC8	Yes	Yes	No	No	NA	NA
ABCC9	Yes	Yes	No	No	NA	NA
ABCD4	Yes	Yes	No	No	NA	NA
ABCG1	Yes	Yes	No	No	NA	NA
ABCG2	Yes	Yes	No	No	NA	NA
ABCG4	Yes	Yes	No	No	NA	NA
ABCG5	Yes	Yes	No	No	NA	NA
ABCG8	Yes	Yes	No	No	NA	NA
ABHD12	Yes	Yes	No	No	NA	NA
ABHD3	Yes	Yes	No	No	NA	NA
ABP1	Yes	Yes	Yes	No	NA	NA
ABRA	Yes	Yes	No	No	NA	NA
ABTB1	Yes	Yes	No	No	NA	NA
ACE2	Yes	Yes	Yes	Yes	1	0.00786
ACP1	Yes	Yes	Yes	No	1	0.89275
ACPP	Yes	Yes	Yes	Yes	1	0.97092
ACSL6	Yes	Yes	No	No	NA	NA
ACVR1	Yes	Yes	No	No	NA	NA
ACVR1C	Yes	Yes	No	No	NA	NA
ACVRL1	Yes	Yes	No	No	NA	NA
ADA	Yes	Yes	No	No	NA	NA
ADAM10	Yes	Yes	Yes	Yes	1	0.11428
ADAM12	Yes	Yes	No	No	NA	NA
ADAM15	Yes	Yes	Yes	Yes	1	0.05403
ADAM22	Yes	Yes	No	No	NA	NA
ADAM28	Yes	Yes	No	No	NA	NA
ADAMTS13	Yes	Yes	Yes	No	1	0.87146
ADAP1	Yes	Yes	No	No	NA	NA
ADAP2	Yes	Yes	No	No	NA	NA
ADCK4	Yes	Yes	No	No	NA	NA
ADCY1	Yes	Yes	Yes	Yes	9	0.9814
ADCY2	Yes	Yes	No	No	NA	NA
ADCY3	Yes	Yes	No	No	NA	NA
ADCY6	Yes	Yes	No	No	NA	NA
ADCY9	Yes	Yes	No	No	NA	NA
ADCYAP1R1	Yes	Yes	No	No	NA	NA
ADD1	Yes	Yes	No	No	NA	NA
ADD2	Yes	Yes	No	No	NA	NA
ADD3	Yes	Yes	No	No	NA	NA
ADI1	Yes	Yes	No	No	NA	NA
ADIPOR1	Yes	Yes	No	No	NA	NA
ADIPOR2	Yes	Yes	No	No	NA	NA
ADORA1	Yes	Yes	No	No	NA	NA
ADORA2A	Yes	Yes	No	No	NA	NA
ADORA2B	Yes	Yes	No	No	NA	NA
ADORA3	Yes	Yes	No	No	NA	NA
ADRA1A	Yes	Yes	No	No	NA	NA
ADRA1B	Yes	Yes	No	No	NA	NA
ADRA1D	Yes	Yes	No	No	NA	NA
ADRA2A	Yes	Yes	No	No	NA	NA
ADRA2B	Yes	Yes	No	No	NA	NA
ADRA2C	Yes	Yes	No	No	NA	NA
ADRB1	Yes	Yes	No	No	NA	NA
ADRB2	Yes	Yes	No	No	NA	NA
ADRB3	Yes	Yes	No	No	NA	NA
ADTRP	Yes	Yes	No	No	NA	NA
AFAP1L1	Yes	Yes	No	No	NA	NA
AFAP1L2	Yes	Yes	No	No	NA	NA
AGER	Yes	Yes	No	No	NA	NA
AGPAT3	Yes	Yes	No	No	NA	NA
AGTR1	Yes	Yes	No	No	NA	NA
AGTR2	Yes	Yes	No	No	NA	NA
AHNAK	Yes	Yes	Yes	No	NA	NA
AHNAK2	Yes	Yes	No	No	NA	NA
AJAP1	Yes	Yes	No	No	NA	NA
AJUBA	Yes	Yes	No	No	NA	NA
AKAP10	Yes	Yes	No	No	NA	NA
AKAP5	Yes	Yes	No	No	NA	NA
AKAP7	Yes	Yes	No	No	NA	NA
AKT1	Yes	Yes	No	No	NA	NA
AKT3	Yes	Yes	No	No	NA	NA
ALCAM	Yes	Yes	Yes	Yes	1	0.51351
ALG10B	Yes	Yes	No	No	NA	NA
ALK	Yes	Yes	Yes	Yes	NA	NA
ALOX12	Yes	Yes	Yes	No	NA	NA
ALOX15	Yes	Yes	No	No	NA	NA
ALOX15B	Yes	Yes	Yes	No	NA	NA
ALPI	Yes	Yes	No	No	NA	NA
ALPP	Yes	Yes	No	No	NA	NA
ALPPL2	Yes	Yes	No	No	NA	NA
AMBP	Yes	Yes	Yes	No	NA	NA
AMICA1	Yes	Yes	No	No	NA	NA
AMIGO1	Yes	Yes	No	No	NA	NA
AMIGO2	Yes	Yes	No	No	NA	NA
AMN	Yes	Yes	Yes	Yes	1	0.00885
AMOT	Yes	Yes	No	No	NA	NA
AMPH	Yes	Yes	No	No	NA	NA
AMPQ_HUMAN	Yes	Yes	No	No	NA	NA
ANGPT1	Yes	Yes	Yes	No	NA	NA
ANGPTL3	Yes	Yes	Yes	No	NA	NA
ANK1	Yes	Yes	No	No	NA	NA
ANK2	Yes	Yes	No	No	NA	NA
ANK3	Yes	Yes	No	No	NA	NA
ANKRD11	Yes	Yes	No	No	NA	NA
ANKRD13A	Yes	Yes	No	No	NA	NA
ANKRD13D	Yes	Yes	No	No	NA	NA
ANKRD20A1	Yes	Yes	No	No	NA	NA
ANKRD27	Yes	Yes	No	No	NA	NA
ANO1	Yes	Yes	Yes	Yes	2	0.98904
ANO10	Yes	Yes	No	No	NA	NA
ANO2	Yes	Yes	No	No	NA	NA
ANO3	Yes	Yes	No	No	NA	NA
ANO4	Yes	Yes	No	No	NA	NA
ANO5	Yes	Yes	No	No	NA	NA
ANO6	Yes	Yes	Yes	Yes	9	0.9884
ANO7	Yes	Yes	No	No	NA	NA
ANO8	Yes	Yes	No	No	NA	NA
ANO9	Yes	Yes	No	No	NA	NA
ANTXR1	Yes	Yes	Yes	Yes	1	0.67313
ANTXR2	Yes	Yes	No	No	NA	NA
ANXA1	Yes	Yes	Yes	No	NA	NA
ANXA13	Yes	Yes	Yes	No	NA	NA
ANXA2	Yes	Yes	Yes	No	NA	NA
ANXA3	Yes	Yes	Yes	No	NA	NA
ANXA8L1	Yes	Yes	Yes	No	NA	NA
ANXA9	Yes	Yes	Yes	No	NA	NA
AOC2	Yes	Yes	No	No	NA	NA
AOC3	Yes	Yes	No	No	NA	NA
AP2A1	Yes	Yes	No	No	NA	NA
AP2A2	Yes	Yes	No	No	NA	NA
AP2M1	Yes	Yes	Yes	No	NA	NA
AP2S1	Yes	Yes	No	No	NA	NA
APBB1	Yes	Yes	No	No	NA	NA
APC	Yes	Yes	No	No	NA	NA
APC2	Yes	Yes	No	No	NA	NA
APCDD1	Yes	Yes	No	No	NA	NA
APLNR	Yes	Yes	No	No	NA	NA
APLP1	Yes	Yes	No	No	NA	NA
APMAP	Yes	Yes	Yes	Yes	1	0.96731
APOLD1	Yes	Yes	No	No	NA	NA
APP	Yes	Yes	Yes	Yes	1	0.02453
AQP1	Yes	Yes	Yes	Yes	6	0.90691
AQP11	Yes	Yes	No	No	NA	NA
AQP2	Yes	Yes	Yes	Yes	6	0.99367
AQP3	Yes	Yes	No	No	NA	NA
AQP4	Yes	Yes	No	No	NA	NA
AQP5	Yes	Yes	Yes	Yes	6	0.97362
AQP6	Yes	Yes	No	No	NA	NA
AQP7	Yes	Yes	Yes	Yes	4	0.90912
ARAP1	Yes	Yes	No	No	NA	NA
ARC	Yes	Yes	No	No	NA	NA
ARF4	Yes	Yes	Yes	No	1	0.10835
ARF6	Yes	Yes	Yes	No	NA	NA
ARFGAP2	Yes	Yes	No	No	NA	NA
ARFIP2	Yes	Yes	No	No	NA	NA
ARHGAP44	Yes	Yes	No	No	NA	NA
ARHGEF1	Yes	Yes	No	No	NA	NA
ARHGEF2	Yes	Yes	No	No	NA	NA
ARHGEF25	Yes	Yes	No	No	NA	NA
ARHGEF39	Yes	Yes	No	No	NA	NA
ARL4A	Yes	Yes	No	No	NA	NA
ARL4C	Yes	Yes	No	No	NA	NA
ARL4D	Yes	Yes	No	No	NA	NA
ARL6	Yes	Yes	Yes	No	NA	NA
ARRB2	Yes	Yes	No	No	NA	NA
ARRDC1	Yes	Yes	Yes	No	NA	NA
ARRDC2	Yes	Yes	No	No	NA	NA
ARRDC3	Yes	Yes	No	No	NA	NA
ARRDC4	Yes	Yes	No	No	NA	NA
ART3	Yes	Yes	Yes	Yes	1	0.26336
ART4	Yes	Yes	No	No	NA	NA
ASAP2	Yes	Yes	No	No	NA	NA
ASIC1	Yes	Yes	No	No	NA	NA
ASIC2	Yes	Yes	No	No	NA	NA
ASIC3	Yes	Yes	No	No	NA	NA
ASIC4	Yes	Yes	No	No	NA	NA
ASIC5	Yes	Yes	No	No	NA	NA
ASPH	Yes	Yes	No	No	NA	NA
ASPSCR1	Yes	Yes	No	No	NA	NA
ASTL	Yes	Yes	No	No	NA	NA
ATP11C	Yes	Yes	No	No	NA	NA
ATP13A4	Yes	Yes	No	No	NA	NA
ATP13A5	Yes	Yes	No	No	NA	NA
ATP1A1	Yes	Yes	Yes	Yes	3	0.99006
ATP1A2	Yes	Yes	Yes	Yes	7	0.99155
ATP1A3	Yes	Yes	Yes	Yes	8	0.99573
ATP1A4	Yes	Yes	No	No	NA	NA
ATP1B1	Yes	Yes	Yes	Yes	1	0.99645
ATP1B2	Yes	Yes	No	No	NA	NA
ATP2B1	Yes	Yes	Yes	Yes	1	0.98072
ATP2B2	Yes	Yes	Yes	Yes	8	0.84632
ATP2C2	Yes	Yes	No	No	NA	NA
ATP4A	Yes	Yes	Yes	Yes	8	0.97792
ATP4B	Yes	Yes	No	No	NA	NA
ATP5A1	Yes	Yes	Yes	No	NA	NA
ATP5B	Yes	Yes	Yes	No	NA	NA
ATP5O	Yes	Yes	Yes	No	NA	NA
ATP6V0A1	Yes	Yes	Yes	Yes	2	0.7423
ATP6V0A2	Yes	Yes	No	No	NA	NA
ATP6V0A4	Yes	Yes	Yes	Yes	6	0.00465
ATP6V0D2	Yes	Yes	Yes	No	NA	NA
ATP6V1B1	Yes	Yes	Yes	No	NA	NA
ATP6V1G1	Yes	Yes	Yes	No	NA	NA
ATP6V1G3	Yes	Yes	No	No	NA	NA
ATP7A	Yes	Yes	No	No	NA	NA
ATP7B	Yes	Yes	No	No	NA	NA
ATP8A1	Yes	Yes	Yes	Yes	1	0.968
ATP8A2	Yes	Yes	No	No	NA	NA
ATP8B1	Yes	Yes	No	No	NA	NA
ATP8B2	Yes	Yes	No	No	NA	NA
ATP8B3	Yes	Yes	No	No	NA	NA
ATP8B4	Yes	Yes	No	No	NA	NA
ATPIF1	Yes	Yes	No	No	NA	NA
AVPR1A	Yes	Yes	No	No	NA	NA
AXIN1	Yes	Yes	No	No	NA	NA
AXL	Yes	Yes	Yes	Yes	1	0.09455
B3GNT3	Yes	Yes	No	No	NA	NA
B4DIM8_HUMAN	Yes	Yes	No	No	NA	NA
B4E0Y9_HUMAN	Yes	Yes	Yes	No	NA	NA
B4GALT1	Yes	Yes	Yes	Yes	1	0.85412
B7Z8R9_HUMAN	Yes	Yes	No	No	NA	NA
BACE1	Yes	Yes	No	No	NA	NA
BACE1.1-201	Yes	Yes	No	No	NA	NA
BACE2	Yes	Yes	No	No	NA	NA
BAG4	Yes	Yes	No	No	NA	NA
BAI1	Yes	Yes	No	No	NA	NA
BAI2	Yes	Yes	No	No	NA	NA
BAI3	Yes	Yes	No	No	NA	NA
BASP1	Yes	Yes	Yes	No	NA	NA
BBS1	Yes	Yes	No	No	NA	NA
BBS2	Yes	Yes	No	No	NA	NA
BBS9	Yes	Yes	No	No	NA	NA
BCAP31	Yes	Yes	No	No	NA	NA
BCORL1	Yes	Yes	No	No	NA	NA
BDKRB1	Yes	Yes	No	No	NA	NA
BDKRB2	Yes	Yes	No	No	NA	NA
BEST1	Yes	Yes	No	No	NA	NA
BEST2	Yes	Yes	No	No	NA	NA
BEST3	Yes	Yes	No	No	NA	NA
BEST4	Yes	Yes	No	No	NA	NA
BFSP1	Yes	Yes	No	No	NA	NA
BFSP2	Yes	Yes	No	No	NA	NA
BGN	Yes	Yes	Yes	No	NA	NA
BLK	Yes	Yes	No	No	NA	NA
BMF	Yes	Yes	No	No	NA	NA
BMP10	Yes	Yes	Yes	No	1	0.79472
BMP2	Yes	Yes	No	No	NA	NA
BMPR2	Yes	Yes	Yes	Yes	1	0.96531
BMX	Yes	Yes	No	No	NA	NA
BNC2	Yes	Yes	No	No	NA	NA
BOC	Yes	Yes	No	No	NA	NA
BRAF	Yes	Yes	No	No	NA	NA
BRS3	Yes	Yes	No	No	NA	NA
BSG	Yes	Yes	Yes	Yes	2	0.77096
BSND	Yes	Yes	No	No	NA	NA
BST1	Yes	Yes	Yes	Yes	1	0.90878
BST2	Yes	Yes	Yes	Yes	1	0.75171
BTBD17	Yes	Yes	No	No	NA	NA
BTC	Yes	Yes	Yes	Yes	2	0.99568
BTK	Yes	Yes	No	No	NA	NA
BTLA	Yes	Yes	No	No	NA	NA
BTN3A1	Yes	Yes	No	No	NA	NA
BTN3A2	Yes	Yes	No	No	NA	NA
BTN3A3	Yes	Yes	No	No	NA	NA
BVES	Yes	Yes	No	No	NA	NA
C10orf54	Yes	Yes	No	No	NA	NA
C11orf24	Yes	Yes	No	No	NA	NA
C11orf34	Yes	Yes	No	No	NA	NA
C14orf180	Yes	Yes	No	No	NA	NA
C15orf27	Yes	Yes	No	No	NA	NA
C15orf62	Yes	Yes	No	No	NA	NA
C19orf26	Yes	Yes	No	No	NA	NA
C1orf192	Yes	Yes	No	No	NA	NA
C1orf210	Yes	Yes	No	No	NA	NA
C1QBP	Yes	Yes	No	No	NA	NA
C1QTNF1	Yes	Yes	Yes	Yes	1	0.75665
C21orf2	Yes	Yes	No	No	NA	NA
C2orf62	Yes	Yes	No	No	NA	NA
C2orf83	Yes	Yes	No	No	NA	NA
C2orf88	Yes	Yes	No	No	NA	NA
C3AR1	Yes	Yes	No	No	NA	NA
C5AR1	Yes	Yes	No	No	NA	NA
C5orf50	Yes	Yes	No	No	NA	NA
C6orf89	Yes	Yes	No	No	NA	NA
C8A	Yes	Yes	Yes	No	NA	NA
C8orf37	Yes	Yes	No	No	NA	NA
C9	Yes	Yes	Yes	No	NA	NA
C9orf3	Yes	Yes	No	No	NA	NA
CA2	Yes	Yes	Yes	No	NA	NA
CA4	Yes	Yes	Yes	Yes	1	0.09741
CA9	Yes	Yes	No	No	NA	NA
CABP1	Yes	Yes	Yes	No	NA	NA
CABP2	Yes	Yes	No	No	NA	NA
CACFD1	Yes	Yes	No	No	NA	NA
CACNA1A	Yes	Yes	No	No	NA	NA
CACNA1C	Yes	Yes	No	No	NA	NA
CACNA1D	Yes	Yes	No	No	NA	NA
CACNA1F	Yes	Yes	No	No	NA	NA
CACNA1S	Yes	Yes	No	No	NA	NA
CACNA2D1	Yes	Yes	Yes	Yes	NA	NA
CACNA2D2	Yes	Yes	No	No	NA	NA
CACNA2D3	Yes	Yes	No	No	NA	NA
CACNA2D4	Yes	Yes	No	No	NA	NA
CACNB1	Yes	Yes	No	No	NA	NA
CACNB2	Yes	Yes	No	No	NA	NA
CACNB3	Yes	Yes	No	No	NA	NA
CACNB4	Yes	Yes	No	No	NA	NA
CACNG3	Yes	Yes	No	No	NA	NA
CACNG4	Yes	Yes	No	No	NA	NA
CACNG5	Yes	Yes	No	No	NA	NA
CACNG6	Yes	Yes	No	No	NA	NA
CACNG7	Yes	Yes	No	No	NA	NA
CACNG8	Yes	Yes	No	No	NA	NA
CADM1	Yes	Yes	Yes	Yes	1	0.03101
CADM2	Yes	Yes	No	No	NA	NA
CADM3	Yes	Yes	No	No	NA	NA
CALCR	Yes	Yes	No	No	NA	NA
CALCRL	Yes	Yes	No	No	NA	NA
CALHM1	Yes	Yes	No	No	NA	NA
CALHM2	Yes	Yes	No	No	NA	NA
CALHM3	Yes	Yes	No	No	NA	NA
CALM1	Yes	Yes	Yes	No	NA	NA
CALM2	Yes	Yes	Yes	No	NA	NA
CALM3	Yes	Yes	Yes	No	NA	NA
CALY	Yes	Yes	No	No	NA	NA
CAMK1G	Yes	Yes	No	No	NA	NA
CAMK2B	Yes	Yes	No	No	NA	NA
CAMK2N1	Yes	Yes	No	No	NA	NA
CAMKV	Yes	Yes	No	No	NA	NA
CAP2	Yes	Yes	No	No	NA	NA
CAPN2	Yes	Yes	Yes	No	NA	NA
CAPN5	Yes	Yes	Yes	No	NA	NA
CARD11	Yes	Yes	Yes	No	NA	NA
CARD14	Yes	Yes	No	No	NA	NA
CASP10	Yes	Yes	No	No	NA	NA
CASP8	Yes	Yes	No	No	NA	NA
CASR	Yes	Yes	No	No	NA	NA
CATSPER1	Yes	Yes	No	No	NA	NA
CATSPER2	Yes	Yes	No	No	NA	NA
CATSPER3	Yes	Yes	No	No	NA	NA
CATSPER4	Yes	Yes	No	No	NA	NA
CATSPERB	Yes	Yes	No	No	NA	NA
CATSPERD	Yes	Yes	No	No	NA	NA
CATSPERG	Yes	Yes	No	No	NA	NA
CAV1	Yes	Yes	No	No	NA	NA
CAV2	Yes	Yes	No	No	NA	NA
CAV3	Yes	Yes	No	No	NA	NA
CBL	Yes	Yes	No	No	NA	NA
CBLB	Yes	Yes	No	No	NA	NA
CBLN1	Yes	Yes	No	No	NA	NA
CCBP2	Yes	Yes	No	No	NA	NA
CCDC124	Yes	Yes	No	No	NA	NA
CCDC62	Yes	Yes	No	No	NA	NA
CCDC70	Yes	Yes	No	No	NA	NA
CCDC78	Yes	Yes	No	No	NA	NA
CCDC88A	Yes	Yes	No	No	NA	NA
CCKAR	Yes	Yes	No	No	NA	NA
CCKBR	Yes	Yes	No	No	NA	NA
CCND3	Yes	Yes	No	No	NA	NA
CCNY	Yes	Yes	Yes	No	NA	NA
CCR1	Yes	Yes	No	No	NA	NA
CCR10	Yes	Yes	No	No	NA	NA
CCR2	Yes	Yes	No	No	NA	NA
CCR3	Yes	Yes	No	No	NA	NA
CCR4	Yes	Yes	No	No	NA	NA
CCR5	Yes	Yes	No	No	NA	NA
CCR6	Yes	Yes	No	No	NA	NA
CCR7	Yes	Yes	No	No	NA	NA
CCR8	Yes	Yes	No	No	NA	NA
CCR9	Yes	Yes	No	No	NA	NA
CCRL1	Yes	Yes	No	No	NA	NA
CCRL2	Yes	Yes	No	No	NA	NA
CD109	Yes	Yes	No	No	NA	NA
CD14	Yes	Yes	Yes	No	NA	NA
CD160	Yes	Yes	No	No	NA	NA
CD163	Yes	Yes	No	No	NA	NA
CD163L1	Yes	Yes	No	No	NA	NA
CD164	Yes	Yes	No	No	NA	NA
CD180	Yes	Yes	No	No	NA	NA
CD19	Yes	Yes	Yes	Yes	1	0.00458
CD1A	Yes	Yes	No	No	NA	NA
CD1B	Yes	Yes	No	No	NA	NA
CD1C	Yes	Yes	No	No	NA	NA
CD1D	Yes	Yes	No	No	NA	NA
CD1E	Yes	Yes	No	No	NA	NA
CD2	Yes	Yes	No	No	NA	NA
CD200	Yes	Yes	No	No	NA	NA
CD200R1	Yes	Yes	No	No	NA	NA
CD207	Yes	Yes	No	No	NA	NA
CD209	Yes	Yes	Yes	Yes	NA	NA
CD22	Yes	Yes	Yes	Yes	1	0.00081
CD226	Yes	Yes	No	No	NA	NA
CD244	Yes	Yes	No	No	NA	NA
CD247	Yes	Yes	No	No	NA	NA
CD27	Yes	Yes	Yes	Yes	1	0.1769
CD28	Yes	Yes	No	No	NA	NA
CD300C	Yes	Yes	No	No	NA	NA
CD300E	Yes	Yes	Yes	Yes	1	0.61486
CD300LB	Yes	Yes	No	No	NA	NA
CD300LD	Yes	Yes	No	No	NA	NA
CD300LF	Yes	Yes	No	No	NA	NA
CD320	Yes	Yes	Yes	Yes	2	0.92257
CD33	Yes	Yes	Yes	Yes	1	0.00142
CD34	Yes	Yes	Yes	Yes	1	0.6456
CD36	Yes	Yes	Yes	Yes	2	0.99561
CD37	Yes	Yes	Yes	Yes	4	0.88066
CD3D	Yes	Yes	No	No	NA	NA
CD3E	Yes	Yes	No	No	NA	NA
CD3G	Yes	Yes	No	No	NA	NA
CD4	Yes	Yes	No	No	NA	NA
CD40	Yes	Yes	Yes	Yes	1	0.0159
CD40LG	Yes	Yes	No	No	NA	NA
CD44	Yes	Yes	Yes	Yes	1	0.23985
CD46	Yes	Yes	Yes	Yes	1	0.6494
CD5	Yes	Yes	No	No	NA	NA
CD52	Yes	Yes	No	No	NA	NA
CD53	Yes	Yes	Yes	Yes	4	0.98648
CD55	Yes	Yes	Yes	Yes	NA	NA
CD58	Yes	Yes	Yes	Yes	2	0.75992
CD59	Yes	Yes	Yes	Yes	NA	NA
CD6	Yes	Yes	No	No	NA	NA
CD63	Yes	Yes	Yes	Yes	2	0.99961
CD68	Yes	Yes	No	No	NA	NA
CD72	Yes	Yes	No	No	NA	NA
CD79A	Yes	Yes	No	No	NA	NA
CD79B	Yes	Yes	Yes	Yes	1	0.3082
CD80	Yes	Yes	No	No	NA	NA
CD81	Yes	Yes	Yes	Yes	4	0.99873
CD86	Yes	Yes	Yes	Yes	2	0.9036
CD8A	Yes	Yes	No	No	NA	NA
CD8B	Yes	Yes	No	No	NA	NA
CD9	Yes	Yes	Yes	Yes	4	0.99969
CD97	Yes	Yes	Yes	Yes	7	0.00057
CDC42	Yes	Yes	Yes	No	NA	NA
CDC42EP2	Yes	Yes	No	No	NA	NA
CDC42SE1	Yes	Yes	No	No	NA	NA
CDC42SE2	Yes	Yes	Yes	No	NA	NA
CDCA5	Yes	Yes	No	No	NA	NA
CDH1	Yes	Yes	Yes	Yes	1	0.00043
CDH10	Yes	Yes	No	No	NA	NA
CDH11	Yes	Yes	Yes	Yes	2	0.20813
CDH12	Yes	Yes	No	No	NA	NA
CDH13	Yes	Yes	Yes	Yes	NA	NA
CDH15	Yes	Yes	Yes	Yes	1	0.44929
CDH17	Yes	Yes	No	No	NA	NA
CDH18	Yes	Yes	No	No	NA	NA
CDH19	Yes	Yes	No	No	NA	NA
CDH2	Yes	Yes	Yes	Yes	1	0.01706
CDH20	Yes	Yes	No	No	NA	NA
CDH22	Yes	Yes	No	No	NA	NA
CDH26	Yes	Yes	No	No	NA	NA
CDH3	Yes	Yes	No	No	NA	NA
CDH4	Yes	Yes	No	No	NA	NA
CDH5	Yes	Yes	No	No	NA	NA
CDH6	Yes	Yes	Yes	Yes	1	0.01949
CDH7	Yes	Yes	No	No	NA	NA
CDH8	Yes	Yes	No	No	NA	NA
CDH9	Yes	Yes	No	No	NA	NA
CDHR3	Yes	Yes	No	No	NA	NA
CDK14	Yes	Yes	No	No	NA	NA
CDK16	Yes	Yes	No	No	NA	NA
CDK5R2	Yes	Yes	No	No	NA	NA
CDON	Yes	Yes	No	No	NA	NA
CDV3	Yes	Yes	No	No	NA	NA
CEACAM1	Yes	Yes	Yes	Yes	1	0.05381
CEACAM5	Yes	Yes	Yes	Yes	NA	NA
CEACAM6	Yes	Yes	Yes	Yes	NA	NA
CEACAM7	Yes	Yes	No	No	NA	NA
CEACAM8	Yes	Yes	Yes	Yes	NA	NA
CELSR1	Yes	Yes	No	No	NA	NA
CELSR2	Yes	Yes	No	No	NA	NA
CELSR3	Yes	Yes	No	No	NA	NA
CERCAM	Yes	Yes	No	No	NA	NA
CFC1	Yes	Yes	No	No	NA	NA
CFLAR	Yes	Yes	No	No	NA	NA
CFTR	Yes	Yes	Yes	Yes	11	0.99454
CHD9	Yes	Yes	No	No	NA	NA
CHIC1	Yes	Yes	No	No	NA	NA
CHIC2	Yes	Yes	No	No	NA	NA
CHMP3	Yes	Yes	Yes	No	NA	NA
CHMP4A	Yes	Yes	Yes	No	NA	NA
CHMP4B	Yes	Yes	Yes	No	NA	NA
CHP1	Yes	Yes	Yes	No	NA	NA
CHP2	Yes	Yes	No	No	NA	NA
CHRM1	Yes	Yes	No	No	NA	NA
CHRM2	Yes	Yes	No	No	NA	NA
CHRM3	Yes	Yes	No	No	NA	NA
CHRM4	Yes	Yes	No	No	NA	NA
CHRM5	Yes	Yes	No	No	NA	NA
CHRNA1	Yes	Yes	No	No	NA	NA
CHRNA2	Yes	Yes	No	No	NA	NA
CHRNA3	Yes	Yes	No	No	NA	NA
CHRNA4	Yes	Yes	No	No	NA	NA
CHRNA5	Yes	Yes	No	No	NA	NA
CHRNA6	Yes	Yes	No	No	NA	NA
CHRNA7	Yes	Yes	No	No	NA	NA
CHRNA9	Yes	Yes	No	No	NA	NA
CHRNB1	Yes	Yes	No	No	NA	NA
CHRNB2	Yes	Yes	No	No	NA	NA
CHRNB3	Yes	Yes	No	No	NA	NA
CHRNB4	Yes	Yes	No	No	NA	NA
CHRND	Yes	Yes	No	No	NA	NA
CHRNE	Yes	Yes	No	No	NA	NA
CHRNG	Yes	Yes	No	No	NA	NA
CIB1	Yes	Yes	Yes	No	NA	NA
CKAP4	Yes	Yes	Yes	Yes	1	0.96172
CLASP2	Yes	Yes	No	No	NA	NA
CLCA1	Yes	Yes	No	No	NA	NA
CLCA2	Yes	Yes	No	No	NA	NA
CLCN1	Yes	Yes	No	No	NA	NA
CLCN2	Yes	Yes	No	No	NA	NA
CLCN3	Yes	Yes	No	No	NA	NA
CLCNKB	Yes	Yes	No	No	NA	NA
CLDN1	Yes	Yes	No	No	NA	NA
CLDN11	Yes	Yes	Yes	Yes	4	0.97373
CLDN12	Yes	Yes	No	No	NA	NA
CLDN14	Yes	Yes	No	No	NA	NA
CLDN15	Yes	Yes	No	No	NA	NA
CLDN16	Yes	Yes	No	No	NA	NA
CLDN17	Yes	Yes	No	No	NA	NA
CLDN18	Yes	Yes	No	No	NA	NA
CLDN19	Yes	Yes	No	No	NA	NA
CLDN20	Yes	Yes	No	No	NA	NA
CLDN24	Yes	Yes	No	No	NA	NA
CLDN25	Yes	Yes	No	No	NA	NA
CLDN5	Yes	Yes	Yes	Yes	4	0.98267
CLDN7	Yes	Yes	No	No	NA	NA
CLDN8	Yes	Yes	No	No	NA	NA
CLDN9	Yes	Yes	No	No	NA	NA
CLDND1	Yes	Yes	No	No	NA	NA
CLEC10A	Yes	Yes	No	No	NA	NA
CLEC12A	Yes	Yes	No	No	NA	NA
CLEC12B	Yes	Yes	No	No	NA	NA
CLEC17A	Yes	Yes	No	No	NA	NA
CLEC1A	Yes	Yes	No	No	NA	NA
CLEC1B	Yes	Yes	No	No	NA	NA
CLEC2A	Yes	Yes	No	No	NA	NA
CLEC2B	Yes	Yes	No	No	NA	NA
CLEC2D	Yes	Yes	No	No	NA	NA
CLEC4A	Yes	Yes	No	No	NA	NA
CLEC4C	Yes	Yes	No	No	NA	NA
CLEC4D	Yes	Yes	No	No	NA	NA
CLEC4E	Yes	Yes	No	No	NA	NA
CLEC4G	Yes	Yes	No	No	NA	NA
CLEC5A	Yes	Yes	No	No	NA	NA
CLEC6A	Yes	Yes	No	No	NA	NA
CLEC9A	Yes	Yes	No	No	NA	NA
CLECL1	Yes	Yes	No	No	NA	NA
CLIC4	Yes	Yes	Yes	No	NA	NA
CLIP3	Yes	Yes	No	No	NA	NA
CLMP	Yes	Yes	Yes	Yes	1	0.02192
CLN3	Yes	Yes	No	No	NA	NA
CLN3.1-001	Yes	Yes	No	No	NA	NA
CLRN1	Yes	Yes	No	No	NA	NA
CLU	Yes	Yes	Yes	No	NA	NA
CMKLR1	Yes	Yes	No	No	NA	NA
CNFN	Yes	Yes	Yes	No	NA	NA
CNGA4	Yes	Yes	No	No	NA	NA
CNIH2	Yes	Yes	No	No	NA	NA
CNIH3	Yes	Yes	No	No	NA	NA
CNNM1	Yes	Yes	No	No	NA	NA
CNNM2	Yes	Yes	No	No	NA	NA
CNPY2	Yes	Yes	No	No	NA	NA
CNR1	Yes	Yes	No	No	NA	NA
CNR2	Yes	Yes	No	No	NA	NA
CNST	Yes	Yes	No	No	NA	NA
CNTFR	Yes	Yes	No	No	NA	NA
CNTN1	Yes	Yes	Yes	Yes	1	0.62651
CNTN2	Yes	Yes	No	No	NA	NA
CNTN3	Yes	Yes	No	No	NA	NA
CNTN4	Yes	Yes	No	No	NA	NA
CNTN6	Yes	Yes	No	No	NA	NA
CNTNAP1	Yes	Yes	No	No	NA	NA
CNTNAP4	Yes	Yes	No	No	NA	NA
COBL	Yes	Yes	No	No	NA	NA
COL13A1	Yes	Yes	No	No	NA	NA
COL23A1	Yes	Yes	No	No	NA	NA
COL25A1	Yes	Yes	Yes	Yes	1	0.83577
CORIN	Yes	Yes	No	No	NA	NA
CORO1A	Yes	Yes	Yes	No	NA	NA
CORO1C	Yes	Yes	No	No	NA	NA
CPAMD8	Yes	Yes	No	No	NA	NA
CPM	Yes	Yes	Yes	Yes	1	0.09644
CPNE3	Yes	Yes	Yes	No	NA	NA
CPNE7	Yes	Yes	Yes	No	NA	NA
CR1	Yes	Yes	Yes	Yes	1	0.20193
CRB1	Yes	Yes	No	No	NA	NA
CRB3	Yes	Yes	Yes	Yes	2	0.76057
CRCT1	Yes	Yes	No	No	NA	NA
CRHR1	Yes	Yes	No	No	NA	NA
CRHR2	Yes	Yes	No	No	NA	NA
CRIPAK	Yes	Yes	No	No	NA	NA
CRLF2	Yes	Yes	No	No	NA	NA
CRTAM	Yes	Yes	No	No	NA	NA
CSF1R	Yes	Yes	No	No	NA	NA
CSF2RA	Yes	Yes	No	No	NA	NA
CSF2RB	Yes	Yes	No	No	NA	NA
CSF3R	Yes	Yes	No	No	NA	NA
CSMD2	Yes	Yes	No	No	NA	NA
CSMD3	Yes	Yes	No	No	NA	NA
CSNK1D	Yes	Yes	No	No	NA	NA
CSPG4	Yes	Yes	Yes	Yes	1	0.06349
CSTA	Yes	Yes	Yes	No	NA	NA
CTGF	Yes	Yes	Yes	No	NA	NA
CTLA4	Yes	Yes	No	No	NA	NA
CTNNA1	Yes	Yes	No	No	NA	NA
CTNNB1	Yes	Yes	Yes	No	NA	NA
CTNND1	Yes	Yes	Yes	No	NA	NA
CTNS	Yes	Yes	Yes	Yes	6	0.99652
CTSG	Yes	Yes	Yes	No	NA	NA
CUBN	Yes	Yes	Yes	No	NA	NA
CX3CL1	Yes	Yes	No	No	NA	NA
CX3CR1	Yes	Yes	No	No	NA	NA
CXADR	Yes	Yes	Yes	Yes	1	0.01686
CXCR1	Yes	Yes	No	No	NA	NA
CXCR2	Yes	Yes	No	No	NA	NA
CXCR3	Yes	Yes	No	No	NA	NA
CXCR4	Yes	Yes	Yes	Yes	7	0.00043
CXCR5	Yes	Yes	No	No	NA	NA
CXCR6	Yes	Yes	No	No	NA	NA
CXCR7	Yes	Yes	No	No	NA	NA
CXXC11	Yes	Yes	No	No	NA	NA
CYBB	Yes	Yes	No	No	NA	NA
CYLD	Yes	Yes	No	No	NA	NA
CYP2W1	Yes	Yes	No	No	NA	NA
CYP4A11	Yes	Yes	Yes	Yes	2	0.01823
CYP4F12	Yes	Yes	No	No	NA	NA
CYP4F2	Yes	Yes	No	No	NA	NA
CYSLTR1	Yes	Yes	No	No	NA	NA
CYSLTR2	Yes	Yes	No	No	NA	NA
CYTH1	Yes	Yes	No	No	NA	NA
CYTH2	Yes	Yes	No	No	NA	NA
CYTH3	Yes	Yes	No	No	NA	NA
CYTH4	Yes	Yes	No	No	NA	NA
DAB2IP	Yes	Yes	Yes	No	NA	NA
DAG1	Yes	Yes	Yes	Yes	1	0.85455
DAGLA	Yes	Yes	No	No	NA	NA
DAGLB	Yes	Yes	No	No	NA	NA
DAPK1	Yes	Yes	No	No	NA	NA
DAPP1	Yes	Yes	No	No	NA	NA
DCBLD2	Yes	Yes	No	No	NA	NA
DCLK1	Yes	Yes	No	No	NA	NA
DCSTAMP	Yes	Yes	No	No	NA	NA
DDX58	Yes	Yes	No	No	NA	NA
DEFB110	Yes	Yes	No	No	NA	NA
DEFB112	Yes	Yes	No	No	NA	NA
DEFB115	Yes	Yes	No	No	NA	NA
DEFB116	Yes	Yes	No	No	NA	NA
DEFB119	Yes	Yes	No	No	NA	NA
DEFB121	Yes	Yes	No	No	NA	NA
DEFB123	Yes	Yes	No	No	NA	NA
DEFB124	Yes	Yes	No	No	NA	NA
DEFB125	Yes	Yes	No	No	NA	NA
DEFB127	Yes	Yes	No	No	NA	NA
DEFB128	Yes	Yes	No	No	NA	NA
DEFB129	Yes	Yes	No	No	NA	NA
DEFB131	Yes	Yes	No	No	NA	NA
DEFB132	Yes	Yes	No	No	NA	NA
DEFB133	Yes	Yes	No	No	NA	NA
DEFB134	Yes	Yes	No	No	NA	NA
DEFB135	Yes	Yes	No	No	NA	NA
DEGS1	Yes	Yes	No	No	NA	NA
DENND4C	Yes	Yes	No	No	NA	NA
DES	Yes	Yes	Yes	No	NA	NA
DGKB	Yes	Yes	No	No	NA	NA
DGKD	Yes	Yes	No	No	NA	NA
DGKQ	Yes	Yes	No	No	NA	NA
DHH	Yes	Yes	Yes	No	NA	NA
DHRS3	Yes	Yes	No	No	NA	NA
DIO1	Yes	Yes	No	No	NA	NA
DIO2	Yes	Yes	No	No	NA	NA
DIO3	Yes	Yes	No	No	NA	NA
DIP2A	Yes	Yes	No	No	NA	NA
DIRAS1	Yes	Yes	No	No	NA	NA
DIRAS2	Yes	Yes	No	No	NA	NA
DISP1	Yes	Yes	No	No	NA	NA
DISP2	Yes	Yes	No	No	NA	NA
DKFZP761J1410	Yes	Yes	No	No	NA	NA
DKK1	Yes	Yes	No	No	NA	NA
DLC1	Yes	Yes	No	No	NA	NA
DLG1	Yes	Yes	Yes	No	NA	NA
DLG2	Yes	Yes	No	No	NA	NA
DLG4	Yes	Yes	No	No	NA	NA
DLG5	Yes	Yes	No	No	NA	NA
DLGAP1	Yes	Yes	No	No	NA	NA
DLGAP3	Yes	Yes	No	No	NA	NA
DLL1	Yes	Yes	No	No	NA	NA
DLL4	Yes	Yes	No	No	NA	NA
DMD	Yes	Yes	No	No	NA	NA
DNAJC5	Yes	Yes	Yes	Yes	1	0.07536
DNAL4	Yes	Yes	No	No	NA	NA
DNER	Yes	Yes	No	No	NA	NA
DNM2	Yes	Yes	Yes	No	NA	NA
DOC2B	Yes	Yes	No	No	NA	NA
DOK3	Yes	Yes	No	No	NA	NA
DOK7	Yes	Yes	No	No	NA	NA
DPEP1	Yes	Yes	Yes	Yes	NA	NA
DPP4	Yes	Yes	Yes	No	1	0.99772
DPP6	Yes	Yes	Yes	Yes	1	0.99977
DRD1	Yes	Yes	No	No	NA	NA
DRD2	Yes	Yes	No	No	NA	NA
DRD3	Yes	Yes	No	No	NA	NA
DRD4	Yes	Yes	No	No	NA	NA
DRD5	Yes	Yes	No	No	NA	NA
DRP2	Yes	Yes	No	No	NA	NA
DSC1	Yes	Yes	Yes	Yes	1	0.02785
DSC3	Yes	Yes	No	No	NA	NA
DSCAM	Yes	Yes	No	No	NA	NA
DSCAML1	Yes	Yes	Yes	Yes	1	0.01699
DSG2	Yes	Yes	Yes	Yes	1	0.91727
DSG4	Yes	Yes	No	No	NA	NA
DSP	Yes	Yes	Yes	No	NA	NA
DST	Yes	Yes	Yes	Yes	1	0.98797
DSTYK	Yes	Yes	No	No	NA	NA
DUOX1	Yes	Yes	No	No	NA	NA
DUSP15	Yes	Yes	No	No	NA	NA
DUSP3	Yes	Yes	Yes	No	NA	NA
DYNAP	Yes	Yes	No	No	NA	NA
DYSF	Yes	Yes	Yes	Yes	1	0.00014
DYTN	Yes	Yes	No	No	NA	NA
E7EPS1_HUMAN	Yes	Yes	No	No	NA	NA
ECE1	Yes	Yes	Yes	Yes	1	0.99977
ECEL1	Yes	Yes	No	No	NA	NA
ECSCR	Yes	Yes	No	No	NA	NA
ECT2	Yes	Yes	No	No	NA	NA
EDA	Yes	Yes	No	No	NA	NA
EDNRA	Yes	Yes	No	No	NA	NA
EDNRB	Yes	Yes	No	No	NA	NA
EEA1	Yes	Yes	Yes	No	NA	NA
EEF1A1	Yes	Yes	Yes	No	NA	NA
EFNA3	Yes	Yes	No	No	NA	NA
EFNA4	Yes	Yes	No	No	NA	NA
EFNA5	Yes	Yes	No	No	NA	NA
EFR3A	Yes	Yes	Yes	No	NA	NA
EFR3B	Yes	Yes	No	No	NA	NA
EGFR	Yes	Yes	Yes	Yes	1	0.04682
EHBP1	Yes	Yes	No	No	NA	NA
EHD1	Yes	Yes	Yes	No	NA	NA
EHD2	Yes	Yes	Yes	No	NA	NA
EHD3	Yes	Yes	No	No	NA	NA
EIF2B1	Yes	Yes	No	No	NA	NA
ELANE	Yes	Yes	Yes	Yes	1	0.98505
ELMO1	Yes	Yes	No	No	NA	NA
ELTD1	Yes	Yes	No	No	NA	NA
EMB	Yes	Yes	No	No	NA	NA
EMCN	Yes	Yes	No	No	NA	NA
EMP1	Yes	Yes	No	No	NA	NA
EMP2	Yes	Yes	No	No	NA	NA
EMP3	Yes	Yes	No	No	NA	NA
EMR1	Yes	Yes	No	No	NA	NA
EMR2	Yes	Yes	No	No	NA	NA
ENDOU	Yes	Yes	No	No	NA	NA
ENOX1	Yes	Yes	Yes	No	NA	NA
ENOX2	Yes	Yes	Yes	No	NA	NA
ENPEP	Yes	Yes	Yes	Yes	1	0.99912
ENPP6	Yes	Yes	Yes	Yes	NA	NA
ENTPD2	Yes	Yes	Yes	Yes	2	0.75905
ENTPD8	Yes	Yes	No	No	NA	NA
EPB41L3	Yes	Yes	No	No	NA	NA
EPB42	Yes	Yes	No	No	NA	NA
EPB49	Yes	Yes	No	No	NA	NA
EPCAM	Yes	Yes	Yes	Yes	1	0.09184
EPGN	Yes	Yes	No	No	NA	NA
EPHA1	Yes	Yes	No	No	NA	NA
EPHA2	Yes	Yes	No	No	NA	NA
EPHA3	Yes	Yes	No	No	NA	NA
EPHA4	Yes	Yes	No	No	NA	NA
EPHA5	Yes	Yes	No	No	NA	NA
EPHA6	Yes	Yes	No	No	NA	NA
EPHA7	Yes	Yes	No	No	NA	NA
EPHA8	Yes	Yes	No	No	NA	NA
EPHB1	Yes	Yes	Yes	Yes	1	0.86791
EPHB2	Yes	Yes	No	No	NA	NA
EPHB3	Yes	Yes	No	No	NA	NA
EPHB4	Yes	Yes	Yes	Yes	1	0.01531
EPM2A	Yes	Yes	No	No	NA	NA
EPN1	Yes	Yes	No	No	NA	NA
EPN3	Yes	Yes	Yes	No	NA	NA
EPOR	Yes	Yes	No	No	NA	NA
EPPIN	Yes	Yes	Yes	No	NA	NA
EPPIN-WFDC6	Yes	Yes	Yes	No	NA	NA
EPS15	Yes	Yes	No	No	NA	NA
EPS8L2	Yes	Yes	Yes	No	NA	NA
ERAS	Yes	Yes	No	No	NA	NA
ERBB2	Yes	Yes	No	No	NA	NA
ERBB2IP	Yes	Yes	No	No	NA	NA
ERBB3	Yes	Yes	No	No	NA	NA
ERC1	Yes	Yes	No	No	NA	NA
ERC2	Yes	Yes	No	No	NA	NA
EREG	Yes	Yes	Yes	Yes	2	0.84652
ERMAP	Yes	Yes	No	No	NA	NA
ERP29	Yes	Yes	Yes	No	1	0.81075
ERP44	Yes	Yes	Yes	No	NA	NA
ERRFI1	Yes	Yes	No	No	NA	NA
ERVFRD-1	Yes	Yes	No	No	NA	NA
ERVW-1	Yes	Yes	No	No	NA	NA
ESR1	Yes	Yes	No	No	NA	NA
ESYT1	Yes	Yes	No	No	NA	NA
ESYT2	Yes	Yes	No	No	NA	NA
ESYT3	Yes	Yes	No	No	NA	NA
EVA1A	Yes	Yes	No	No	NA	NA
EVPL	Yes	Yes	Yes	No	NA	NA
EXOC1	Yes	Yes	No	No	NA	NA
EXOC6	Yes	Yes	No	No	NA	NA
EZR	Yes	Yes	Yes	No	NA	NA
F2R	Yes	Yes	No	No	NA	NA
F2RL1	Yes	Yes	No	No	NA	NA
F2RL2	Yes	Yes	No	No	NA	NA
F2RL3	Yes	Yes	No	No	NA	NA
F3	Yes	Yes	Yes	Yes	1	0.4226
F5H8K0_HUMAN	Yes	Yes	No	No	NA	NA
FADD	Yes	Yes	No	No	NA	NA
FAF1	Yes	Yes	No	No	NA	NA
FAM115A	Yes	Yes	No	No	NA	NA
FAM115C	Yes	Yes	No	No	NA	NA
FAM123A	Yes	Yes	No	No	NA	NA
FAM123B	Yes	Yes	No	No	NA	NA
FAM123C	Yes	Yes	No	No	NA	NA
FAM125B	Yes	Yes	Yes	No	NA	NA
FAM126A	Yes	Yes	No	No	NA	NA
FAM26D	Yes	Yes	No	No	NA	NA
FAM26F	Yes	Yes	No	No	NA	NA
FAM57A	Yes	Yes	No	No	NA	NA
FAM59A	Yes	Yes	No	No	NA	NA
FAM84B	Yes	Yes	No	No	NA	NA
FAP	Yes	Yes	No	No	NA	NA
FARP1	Yes	Yes	No	No	NA	NA
FAS	Yes	Yes	Yes	Yes	NA	NA
FASLG	Yes	Yes	Yes	Yes	1	0.95717
FAT1	Yes	Yes	Yes	Yes	1	0.00687
FBXO45	Yes	Yes	No	No	NA	NA
FCAMR	Yes	Yes	No	No	NA	NA
FCER1A	Yes	Yes	No	No	NA	NA
FCER1G	Yes	Yes	No	No	NA	NA
FCER2	Yes	Yes	Yes	Yes	1	0.99566
FCGR1B	Yes	Yes	No	No	NA	NA
FCGR2B	Yes	Yes	No	No	NA	NA
FCGR3A	Yes	Yes	Yes	Yes	1	0.2071
FCGR3B	Yes	Yes	Yes	Yes	1	0.16989
FCGRT	Yes	Yes	No	No	NA	NA
FCHO1	Yes	Yes	No	No	NA	NA
FCN1	Yes	Yes	No	No	NA	NA
FCRL1	Yes	Yes	No	No	NA	NA
FCRL3	Yes	Yes	No	No	NA	NA
FCRL6	Yes	Yes	No	No	NA	NA
FER	Yes	Yes	No	No	NA	NA
FERMT1	Yes	Yes	No	No	NA	NA
FERMT2	Yes	Yes	No	No	NA	NA
FES	Yes	Yes	No	No	NA	NA
FFAR1	Yes	Yes	No	No	NA	NA
FFAR2	Yes	Yes	No	No	NA	NA
FFAR3	Yes	Yes	No	No	NA	NA
FGF10	Yes	Yes	Yes	No	1	0.69778
FGFR1	Yes	Yes	No	No	NA	NA
FGFR2	Yes	Yes	No	No	NA	NA
FGFR3	Yes	Yes	No	No	NA	NA
FGFR4	Yes	Yes	No	No	NA	NA
FGFRL1	Yes	Yes	No	No	NA	NA
FLOT2	Yes	Yes	Yes	No	NA	NA
FLRT3	Yes	Yes	Yes	Yes	1	0.36996
FLT1	Yes	Yes	No	No	NA	NA
FLT3LG	Yes	Yes	No	No	NA	NA
FLT4	Yes	Yes	No	No	NA	NA
FLVCR2	Yes	Yes	No	No	NA	NA
FMN1	Yes	Yes	No	No	NA	NA
FNBP1	Yes	Yes	No	No	NA	NA
FNDC4	Yes	Yes	No	No	NA	NA
FOLR1	Yes	Yes	Yes	Yes	1	0.49423
FOLR2	Yes	Yes	No	No	NA	NA
FOLR4	Yes	Yes	No	No	NA	NA
FPR1	Yes	Yes	No	No	NA	NA
FPR2	Yes	Yes	No	No	NA	NA
FPR3	Yes	Yes	No	No	NA	NA
FRAS1	Yes	Yes	Yes	Yes	1	0.00645
FRMD6	Yes	Yes	No	No	NA	NA
FRMPD2	Yes	Yes	No	No	NA	NA
FRRS1L	Yes	Yes	No	No	NA	NA
FRS2	Yes	Yes	No	No	NA	NA
FSCN1	Yes	Yes	Yes	No	NA	NA
FSD1	Yes	Yes	No	No	NA	NA
FSHR	Yes	Yes	No	No	NA	NA
FURIN	Yes	Yes	Yes	Yes	1	0.63457
FXYD4	Yes	Yes	No	No	NA	NA
FXYD6	Yes	Yes	No	No	NA	NA
FXYD7	Yes	Yes	No	No	NA	NA
FYN	Yes	Yes	No	No	NA	NA
FZD10	Yes	Yes	No	No	NA	NA
FZD3	Yes	Yes	No	No	NA	NA
FZD5	Yes	Yes	No	No	NA	NA
FZD6	Yes	Yes	No	No	NA	NA
FZD7	Yes	Yes	No	No	NA	NA
G3BP1	Yes	Yes	No	No	NA	NA
GAB2	Yes	Yes	No	No	NA	NA
GABBR2	Yes	Yes	No	No	NA	NA
GABRA1	Yes	Yes	No	No	NA	NA
GABRA2	Yes	Yes	No	No	NA	NA
GABRA3	Yes	Yes	No	No	NA	NA
GABRA4	Yes	Yes	No	No	NA	NA
GABRA5	Yes	Yes	No	No	NA	NA
GABRA6	Yes	Yes	No	No	NA	NA
GABRB1	Yes	Yes	No	No	NA	NA
GABRB2	Yes	Yes	Yes	Yes	4	0.62218
GABRB3	Yes	Yes	No	No	NA	NA
GABRD	Yes	Yes	No	No	NA	NA
GABRE	Yes	Yes	No	No	NA	NA
GABRG1	Yes	Yes	No	No	NA	NA
GABRG2	Yes	Yes	No	No	NA	NA
GABRG3	Yes	Yes	No	No	NA	NA
GABRP	Yes	Yes	No	No	NA	NA
GABRQ	Yes	Yes	No	No	NA	NA
GABRR1	Yes	Yes	No	No	NA	NA
GABRR2	Yes	Yes	No	No	NA	NA
GABRR3	Yes	Yes	No	No	NA	NA
GAD2	Yes	Yes	No	No	NA	NA
GAL3ST1	Yes	Yes	No	No	NA	NA
GALR1	Yes	Yes	No	No	NA	NA
GALR2	Yes	Yes	No	No	NA	NA
GALR3	Yes	Yes	No	No	NA	NA
GAP43	Yes	Yes	No	No	NA	NA
GAPT	Yes	Yes	No	No	NA	NA
GAS1	Yes	Yes	No	No	NA	NA
GCC1	Yes	Yes	No	No	NA	NA
GCGR	Yes	Yes	No	No	NA	NA
GCSAM	Yes	Yes	No	No	NA	NA
GDPD2	Yes	Yes	No	No	NA	NA
GEM	Yes	Yes	No	No	NA	NA
GFRA3	Yes	Yes	No	No	NA	NA
GFRA4	Yes	Yes	Yes	No	NA	NA
GGT1	Yes	Yes	Yes	Yes	2	0.99939
GGT2	Yes	Yes	Yes	Yes	2	0.98456
GGT5	Yes	Yes	No	No	NA	NA
GGT6	Yes	Yes	Yes	Yes	NA	NA
GGT7	Yes	Yes	No	No	NA	NA
GGTLC1	Yes	Yes	No	No	NA	NA
GGTLC2	Yes	Yes	Yes	No	NA	NA
GGTLC3	Yes	Yes	Yes	No	NA	NA
GHR	Yes	Yes	No	No	NA	NA
GHRHR	Yes	Yes	No	No	NA	NA
GHSR	Yes	Yes	No	No	NA	NA
GIF	Yes	Yes	Yes	No	NA	NA
GIPR	Yes	Yes	No	No	NA	NA
GJA1	Yes	Yes	Yes	Yes	4	0.92628
GJA10	Yes	Yes	No	No	NA	NA
GJA3	Yes	Yes	No	No	NA	NA
GJA4	Yes	Yes	No	No	NA	NA
GJA5	Yes	Yes	No	No	NA	NA
GJB1	Yes	Yes	No	No	NA	NA
GJB2	Yes	Yes	No	No	NA	NA
GJB3	Yes	Yes	No	No	NA	NA
GJB4	Yes	Yes	No	No	NA	NA
GJB5	Yes	Yes	No	No	NA	NA
GJB6	Yes	Yes	No	No	NA	NA
GJC1	Yes	Yes	No	No	NA	NA
GJC2	Yes	Yes	No	No	NA	NA
GJD2	Yes	Yes	No	No	NA	NA
GJD3	Yes	Yes	No	No	NA	NA
GLDN	Yes	Yes	Yes	Yes	1	0.86306
GLP1R	Yes	Yes	No	No	NA	NA
GLP2R	Yes	Yes	No	No	NA	NA
GLRA1	Yes	Yes	No	No	NA	NA
GLRA2	Yes	Yes	No	No	NA	NA
GLRA3	Yes	Yes	No	No	NA	NA
GLRA4	Yes	Yes	No	No	NA	NA
GLRB	Yes	Yes	No	No	NA	NA
GML	Yes	Yes	No	No	NA	NA
GNA15	Yes	Yes	No	No	NA	NA
GNAI1	Yes	Yes	Yes	No	NA	NA
GNAI2	Yes	Yes	Yes	No	NA	NA
GNAI3	Yes	Yes	Yes	No	NA	NA
GNAO1	Yes	Yes	No	No	NA	NA
GNAS	Yes	Yes	Yes	No	NA	NA
GNAT2	Yes	Yes	No	No	NA	NA
GNB1	Yes	Yes	Yes	No	NA	NA
GNB1L	Yes	Yes	No	No	NA	NA
GNB2L1	Yes	Yes	Yes	No	NA	NA
GNG11	Yes	Yes	No	No	NA	NA
GNG13	Yes	Yes	No	No	NA	NA
GNG5	Yes	Yes	Yes	No	NA	NA
GNG8	Yes	Yes	No	No	NA	NA
GNGT1	Yes	Yes	No	No	NA	NA
GNGT2	Yes	Yes	No	No	NA	NA
GNRHR	Yes	Yes	No	No	NA	NA
GNRHR2	Yes	Yes	No	No	NA	NA
GOPC	Yes	Yes	No	No	NA	NA
GOT2	Yes	Yes	Yes	No	NA	NA
GP1BA	Yes	Yes	Yes	Yes	1	4e-05
GPBAR1	Yes	Yes	No	No	NA	NA
GPC1	Yes	Yes	Yes	Yes	NA	NA
GPC2	Yes	Yes	No	No	NA	NA
GPC4	Yes	Yes	Yes	Yes	NA	NA
GPC5	Yes	Yes	No	No	NA	NA
GPER	Yes	Yes	No	No	NA	NA
GPHN	Yes	Yes	No	No	NA	NA
GPIHBP1	Yes	Yes	No	No	NA	NA
GPM6B	Yes	Yes	No	No	NA	NA
GPNMB	Yes	Yes	No	No	NA	NA
GPR1	Yes	Yes	No	No	NA	NA
GPR101	Yes	Yes	No	No	NA	NA
GPR116	Yes	Yes	No	No	NA	NA
GPR119	Yes	Yes	No	No	NA	NA
GPR12	Yes	Yes	No	No	NA	NA
GPR132	Yes	Yes	No	No	NA	NA
GPR133	Yes	Yes	No	No	NA	NA
GPR135	Yes	Yes	No	No	NA	NA
GPR137B	Yes	Yes	No	No	NA	NA
GPR139	Yes	Yes	No	No	NA	NA
GPR141	Yes	Yes	No	No	NA	NA
GPR142	Yes	Yes	No	No	NA	NA
GPR143	Yes	Yes	No	No	NA	NA
GPR146	Yes	Yes	No	No	NA	NA
GPR148	Yes	Yes	No	No	NA	NA
GPR149	Yes	Yes	No	No	NA	NA
GPR15	Yes	Yes	No	No	NA	NA
GPR150	Yes	Yes	No	No	NA	NA
GPR151	Yes	Yes	No	No	NA	NA
GPR152	Yes	Yes	No	No	NA	NA
GPR153	Yes	Yes	No	No	NA	NA
GPR156	Yes	Yes	No	No	NA	NA
GPR157	Yes	Yes	No	No	NA	NA
GPR158	Yes	Yes	No	No	NA	NA
GPR160	Yes	Yes	No	No	NA	NA
GPR161	Yes	Yes	No	No	NA	NA
GPR162	Yes	Yes	No	No	NA	NA
GPR17	Yes	Yes	No	No	NA	NA
GPR171	Yes	Yes	No	No	NA	NA
GPR173	Yes	Yes	No	No	NA	NA
GPR174	Yes	Yes	No	No	NA	NA
GPR176	Yes	Yes	No	No	NA	NA
GPR179	Yes	Yes	No	No	NA	NA
GPR18	Yes	Yes	No	No	NA	NA
GPR182	Yes	Yes	No	No	NA	NA
GPR183	Yes	Yes	No	No	NA	NA
GPR19	Yes	Yes	No	No	NA	NA
GPR20	Yes	Yes	No	No	NA	NA
GPR21	Yes	Yes	No	No	NA	NA
GPR22	Yes	Yes	No	No	NA	NA
GPR25	Yes	Yes	No	No	NA	NA
GPR26	Yes	Yes	No	No	NA	NA
GPR27	Yes	Yes	No	No	NA	NA
GPR3	Yes	Yes	No	No	NA	NA
GPR31	Yes	Yes	No	No	NA	NA
GPR32	Yes	Yes	No	No	NA	NA
GPR34	Yes	Yes	No	No	NA	NA
GPR35	Yes	Yes	No	No	NA	NA
GPR37L1	Yes	Yes	No	No	NA	NA
GPR39	Yes	Yes	No	No	NA	NA
GPR4	Yes	Yes	No	No	NA	NA
GPR42	Yes	Yes	No	No	NA	NA
GPR45	Yes	Yes	No	No	NA	NA
GPR50	Yes	Yes	No	No	NA	NA
GPR52	Yes	Yes	No	No	NA	NA
GPR55	Yes	Yes	No	No	NA	NA
GPR6	Yes	Yes	No	No	NA	NA
GPR61	Yes	Yes	No	No	NA	NA
GPR62	Yes	Yes	No	No	NA	NA
GPR63	Yes	Yes	No	No	NA	NA
GPR64	Yes	Yes	Yes	Yes	7	0.61541
GPR65	Yes	Yes	No	No	NA	NA
GPR68	Yes	Yes	No	No	NA	NA
GPR75	Yes	Yes	No	No	NA	NA
GPR77	Yes	Yes	No	No	NA	NA
GPR78	Yes	Yes	No	No	NA	NA
GPR82	Yes	Yes	No	No	NA	NA
GPR83	Yes	Yes	No	No	NA	NA
GPR84	Yes	Yes	No	No	NA	NA
GPR87	Yes	Yes	No	No	NA	NA
GPR88	Yes	Yes	No	No	NA	NA
GPR97	Yes	Yes	No	No	NA	NA
GPR98	Yes	Yes	Yes	Yes	7	0.57635
GPRC5A	Yes	Yes	Yes	Yes	7	0.05973
GPRC5C	Yes	Yes	Yes	Yes	8	0.99656
GPRC5D	Yes	Yes	No	No	NA	NA
GPRC6A	Yes	Yes	No	No	NA	NA
GPRIN1	Yes	Yes	No	No	NA	NA
GPSM1	Yes	Yes	No	No	NA	NA
GRASP	Yes	Yes	No	No	NA	NA
GRB10	Yes	Yes	No	No	NA	NA
GRB14	Yes	Yes	No	No	NA	NA
GRIA1	Yes	Yes	No	No	NA	NA
GRIA2	Yes	Yes	No	No	NA	NA
GRIA3	Yes	Yes	No	No	NA	NA
GRIA4	Yes	Yes	Yes	Yes	4	0.94703
GRID2	Yes	Yes	No	No	NA	NA
GRID2IP	Yes	Yes	No	No	NA	NA
GRIK1	Yes	Yes	No	No	NA	NA
GRIK2	Yes	Yes	No	No	NA	NA
GRIK3	Yes	Yes	No	No	NA	NA
GRIK4	Yes	Yes	No	No	NA	NA
GRIK5	Yes	Yes	No	No	NA	NA
GRIN1	Yes	Yes	No	No	NA	NA
GRIN2A	Yes	Yes	No	No	NA	NA
GRIN2B	Yes	Yes	No	No	NA	NA
GRIN2C	Yes	Yes	No	No	NA	NA
GRIN2D	Yes	Yes	No	No	NA	NA
GRIN3A	Yes	Yes	No	No	NA	NA
GRIN3B	Yes	Yes	No	No	NA	NA
GRK1	Yes	Yes	No	No	NA	NA
GRK5	Yes	Yes	No	No	NA	NA
GRK7	Yes	Yes	No	No	NA	NA
GRM1	Yes	Yes	No	No	NA	NA
GRM2	Yes	Yes	No	No	NA	NA
GRM3	Yes	Yes	No	No	NA	NA
GRM4	Yes	Yes	No	No	NA	NA
GRM6	Yes	Yes	No	No	NA	NA
GRM7	Yes	Yes	No	No	NA	NA
GRM8	Yes	Yes	No	No	NA	NA
GRPR	Yes	Yes	No	No	NA	NA
GSG1L	Yes	Yes	No	No	NA	NA
GSK3B	Yes	Yes	No	No	NA	NA
GSN	Yes	Yes	Yes	No	NA	NA
GUCA1B	Yes	Yes	No	No	NA	NA
GUCA1C	Yes	Yes	No	No	NA	NA
GUCY2C	Yes	Yes	No	No	NA	NA
GYPB	Yes	Yes	No	No	NA	NA
GYPC	Yes	Yes	No	No	NA	NA
GZMA	Yes	Yes	No	No	NA	NA
GZMB	Yes	Yes	No	No	NA	NA
H7C241_HUMAN	Yes	Yes	No	No	NA	NA
HAS1	Yes	Yes	No	No	NA	NA
HAS2	Yes	Yes	No	No	NA	NA
HBEGF	Yes	Yes	Yes	Yes	1	0.3121
HCAR1	Yes	Yes	No	No	NA	NA
HCAR2	Yes	Yes	No	No	NA	NA
HCAR3	Yes	Yes	No	No	NA	NA
HCK	Yes	Yes	No	No	NA	NA
HCN1	Yes	Yes	No	No	NA	NA
HCN2	Yes	Yes	No	No	NA	NA
HCN3	Yes	Yes	No	No	NA	NA
HCN4	Yes	Yes	No	No	NA	NA
HCRTR1	Yes	Yes	No	No	NA	NA
HCRTR2	Yes	Yes	No	No	NA	NA
HCST	Yes	Yes	No	No	NA	NA
HDLBP	Yes	Yes	No	No	NA	NA
HEPH	Yes	Yes	No	No	NA	NA
HHIP	Yes	Yes	No	No	NA	NA
HLA-A	Yes	Yes	Yes	Yes	1	0.75742
HLA-B	Yes	Yes	Yes	Yes	1	0.54349
HLA-C	Yes	Yes	Yes	Yes	1	0.25272
HLA-DRB1	Yes	Yes	Yes	Yes	2	0.43123
HMGB1	Yes	Yes	Yes	No	NA	NA
HMOX2	Yes	Yes	No	No	NA	NA
HOMER1	Yes	Yes	No	No	NA	NA
HOMER3	Yes	Yes	No	No	NA	NA
HPN	Yes	Yes	Yes	Yes	1	0.99268
HRAS	Yes	Yes	No	No	NA	NA
HRH1	Yes	Yes	No	No	NA	NA
HRH2	Yes	Yes	No	No	NA	NA
HRH3	Yes	Yes	No	No	NA	NA
HRH4	Yes	Yes	No	No	NA	NA
HS3ST3B1	Yes	Yes	No	No	NA	NA
HS6ST1	Yes	Yes	No	No	NA	NA
HSD17B10	Yes	Yes	No	No	NA	NA
HSD17B7	Yes	Yes	No	No	NA	NA
HSP90AA1	Yes	Yes	Yes	No	NA	NA
HSPA8	Yes	Yes	Yes	No	NA	NA
HSPD1	Yes	Yes	Yes	No	NA	NA
HTR1A	Yes	Yes	No	No	NA	NA
HTR1B	Yes	Yes	No	No	NA	NA
HTR1D	Yes	Yes	No	No	NA	NA
HTR1E	Yes	Yes	No	No	NA	NA
HTR1F	Yes	Yes	No	No	NA	NA
HTR2A	Yes	Yes	No	No	NA	NA
HTR2B	Yes	Yes	No	No	NA	NA
HTR2C	Yes	Yes	No	No	NA	NA
HTR3A	Yes	Yes	No	No	NA	NA
HTR3B	Yes	Yes	No	No	NA	NA
HTR3C	Yes	Yes	No	No	NA	NA
HTR3D	Yes	Yes	No	No	NA	NA
HTR3E	Yes	Yes	No	No	NA	NA
HTR4	Yes	Yes	No	No	NA	NA
HTR5A	Yes	Yes	No	No	NA	NA
HTR6	Yes	Yes	No	No	NA	NA
HTR7	Yes	Yes	No	No	NA	NA
HVCN1	Yes	Yes	No	No	NA	NA
HYAL2	Yes	Yes	No	No	NA	NA
ICAM1	Yes	Yes	Yes	Yes	1	0.05839
ICAM4	Yes	Yes	No	No	NA	NA
ICOS	Yes	Yes	No	No	NA	NA
IDE	Yes	Yes	Yes	No	NA	NA
IFI6	Yes	Yes	No	No	NA	NA
IFIT5	Yes	Yes	No	No	NA	NA
IFITM10	Yes	Yes	No	No	NA	NA
IFITM2	Yes	Yes	No	No	NA	NA
IFITM3	Yes	Yes	Yes	Yes	1	0.06981
IFITM5	Yes	Yes	No	No	NA	NA
IFNAR1	Yes	Yes	No	No	NA	NA
IFNAR2	Yes	Yes	Yes	Yes	2	0.90658
IFNGR1	Yes	Yes	No	No	NA	NA
IFNGR2	Yes	Yes	No	No	NA	NA
IGDCC4	Yes	Yes	No	No	NA	NA
IGF2R	Yes	Yes	Yes	Yes	1	0.03371
IGFLR1	Yes	Yes	No	No	NA	NA
IGSF3	Yes	Yes	No	No	NA	NA
IGSF5	Yes	Yes	No	No	NA	NA
IGSF6	Yes	Yes	No	No	NA	NA
IGSF9	Yes	Yes	No	No	NA	NA
IGSF9B	Yes	Yes	No	No	NA	NA
IHH	Yes	Yes	No	No	NA	NA
IL10RB	Yes	Yes	Yes	Yes	1	0.29218
IL17RA	Yes	Yes	No	No	NA	NA
IL17RB	Yes	Yes	No	No	NA	NA
IL17RC	Yes	Yes	No	No	NA	NA
IL17RE	Yes	Yes	No	No	NA	NA
IL17REL	Yes	Yes	No	No	NA	NA
IL1R1	Yes	Yes	No	No	NA	NA
IL1R2	Yes	Yes	No	No	NA	NA
IL1RAP	Yes	Yes	No	No	NA	NA
IL1RAPL1	Yes	Yes	No	No	NA	NA
IL1RL1	Yes	Yes	No	No	NA	NA
IL1RL2	Yes	Yes	No	No	NA	NA
IL20RA	Yes	Yes	No	No	NA	NA
IL20RB	Yes	Yes	No	No	NA	NA
IL28RA	Yes	Yes	No	No	NA	NA
IL29	Yes	Yes	No	No	NA	NA
IL4R	Yes	Yes	No	No	NA	NA
IL6R	Yes	Yes	No	No	NA	NA
IL7R	Yes	Yes	No	No	NA	NA
IL9R	Yes	Yes	No	No	NA	NA
ILDR1	Yes	Yes	No	No	NA	NA
INPP5K	Yes	Yes	No	No	NA	NA
INSR	Yes	Yes	Yes	Yes	2	0.8821
INSRR	Yes	Yes	No	No	NA	NA
IPCEF1	Yes	Yes	No	No	NA	NA
IQGAP1	Yes	Yes	Yes	No	NA	NA
IQGAP2	Yes	Yes	Yes	No	NA	NA
IRAK1	Yes	Yes	No	No	NA	NA
IRAK2	Yes	Yes	No	No	NA	NA
IRAK4	Yes	Yes	No	No	NA	NA
IRGM	Yes	Yes	No	No	NA	NA
IRS1	Yes	Yes	No	No	NA	NA
IRS2	Yes	Yes	No	No	NA	NA
IRS4	Yes	Yes	No	No	NA	NA
ISLR2	Yes	Yes	No	No	NA	NA
ITCH	Yes	Yes	Yes	No	NA	NA
ITFG3	Yes	Yes	Yes	Yes	1	0.98302
ITGA1	Yes	Yes	Yes	Yes	1	0.14317
ITGA11	Yes	Yes	No	No	NA	NA
ITGA2	Yes	Yes	No	No	NA	NA
ITGA2B	Yes	Yes	Yes	No	1	0.61616
ITGA3	Yes	Yes	Yes	Yes	2	0.91587
ITGA4	Yes	Yes	Yes	Yes	1	0.01604
ITGA5	Yes	Yes	No	No	NA	NA
ITGA6	Yes	Yes	No	No	NA	NA
ITGA8	Yes	Yes	No	No	NA	NA
ITGA9	Yes	Yes	No	No	NA	NA
ITGAD	Yes	Yes	No	No	NA	NA
ITGAL	Yes	Yes	Yes	Yes	2	0.9083
ITGAM	Yes	Yes	Yes	Yes	1	0.45433
ITGAV	Yes	Yes	Yes	Yes	2	0.83425
ITGAX	Yes	Yes	No	No	NA	NA
ITGB1	Yes	Yes	Yes	Yes	1	0.15447
ITGB2	Yes	Yes	Yes	Yes	1	0.00304
ITGB3	Yes	Yes	Yes	Yes	1	0.35773
ITGB4	Yes	Yes	Yes	Yes	NA	NA
ITGB5	Yes	Yes	Yes	Yes	1	0.03826
ITGB7	Yes	Yes	Yes	Yes	1	0.26334
ITGB8	Yes	Yes	Yes	Yes	1	0.02145
ITM2B	Yes	Yes	Yes	Yes	1	0.9576
ITM2C	Yes	Yes	Yes	Yes	1	0.84924
ITPR3	Yes	Yes	No	No	NA	NA
ITSN1	Yes	Yes	No	No	NA	NA
IVL	Yes	Yes	Yes	No	NA	NA
IYD	Yes	Yes	No	No	NA	NA
IZUMO1	Yes	Yes	No	No	NA	NA
IZUMO3	Yes	Yes	No	No	NA	NA
JAG1	Yes	Yes	No	No	NA	NA
JAM2	Yes	Yes	No	No	NA	NA
JUP	Yes	Yes	Yes	No	NA	NA
KANK1	Yes	Yes	No	No	NA	NA
KARS	Yes	Yes	No	No	NA	NA
KAZN	Yes	Yes	No	No	NA	NA
KCNA1	Yes	Yes	No	No	NA	NA
KCNA10	Yes	Yes	No	No	NA	NA
KCNA2	Yes	Yes	No	No	NA	NA
KCNA3	Yes	Yes	No	No	NA	NA
KCNA4	Yes	Yes	No	No	NA	NA
KCNA5	Yes	Yes	No	No	NA	NA
KCNA6	Yes	Yes	No	No	NA	NA
KCNA7	Yes	Yes	No	No	NA	NA
KCNAB1	Yes	Yes	No	No	NA	NA
KCNAB2	Yes	Yes	No	No	NA	NA
KCNAB3	Yes	Yes	No	No	NA	NA
KCNB1	Yes	Yes	No	No	NA	NA
KCNB2	Yes	Yes	No	No	NA	NA
KCNC1	Yes	Yes	No	No	NA	NA
KCNC2	Yes	Yes	No	No	NA	NA
KCNC3	Yes	Yes	No	No	NA	NA
KCND1	Yes	Yes	No	No	NA	NA
KCND2	Yes	Yes	No	No	NA	NA
KCND3	Yes	Yes	No	No	NA	NA
KCNE1	Yes	Yes	No	No	NA	NA
KCNE1L	Yes	Yes	No	No	NA	NA
KCNE2	Yes	Yes	No	No	NA	NA
KCNE3	Yes	Yes	No	No	NA	NA
KCNG1	Yes	Yes	No	No	NA	NA
KCNG3	Yes	Yes	No	No	NA	NA
KCNG4	Yes	Yes	No	No	NA	NA
KCNH1	Yes	Yes	No	No	NA	NA
KCNH2	Yes	Yes	No	No	NA	NA
KCNH5	Yes	Yes	No	No	NA	NA
KCNIP1	Yes	Yes	No	No	NA	NA
KCNIP2	Yes	Yes	No	No	NA	NA
KCNIP3	Yes	Yes	No	No	NA	NA
KCNIP4	Yes	Yes	No	No	NA	NA
KCNJ1	Yes	Yes	No	No	NA	NA
KCNJ10	Yes	Yes	No	No	NA	NA
KCNJ12	Yes	Yes	No	No	NA	NA
KCNJ16	Yes	Yes	No	No	NA	NA
KCNJ4	Yes	Yes	No	No	NA	NA
KCNJ6	Yes	Yes	No	No	NA	NA
KCNK1	Yes	Yes	No	No	NA	NA
KCNK10	Yes	Yes	No	No	NA	NA
KCNK12	Yes	Yes	No	No	NA	NA
KCNK13	Yes	Yes	No	No	NA	NA
KCNK18	Yes	Yes	No	No	NA	NA
KCNK2	Yes	Yes	No	No	NA	NA
KCNK3	Yes	Yes	No	No	NA	NA
KCNK5	Yes	Yes	No	No	NA	NA
KCNK6	Yes	Yes	No	No	NA	NA
KCNK7	Yes	Yes	No	No	NA	NA
KCNK9	Yes	Yes	No	No	NA	NA
KCNMA1	Yes	Yes	Yes	Yes	6	0.57736
KCNMB2	Yes	Yes	No	No	NA	NA
KCNMB3	Yes	Yes	No	No	NA	NA
KCNMB4	Yes	Yes	No	No	NA	NA
KCNN2	Yes	Yes	No	No	NA	NA
KCNN4	Yes	Yes	No	No	NA	NA
KCNQ1	Yes	Yes	No	No	NA	NA
KCNQ4	Yes	Yes	No	No	NA	NA
KCNS1	Yes	Yes	No	No	NA	NA
KCNS2	Yes	Yes	No	No	NA	NA
KCNS3	Yes	Yes	No	No	NA	NA
KCNT1	Yes	Yes	No	No	NA	NA
KCNT2	Yes	Yes	No	No	NA	NA
KCNU1	Yes	Yes	No	No	NA	NA
KCNV1	Yes	Yes	No	No	NA	NA
KCNV2	Yes	Yes	No	No	NA	NA
KCTD16	Yes	Yes	No	No	NA	NA
KCTD7	Yes	Yes	No	No	NA	NA
KCTD8	Yes	Yes	No	No	NA	NA
KDR	Yes	Yes	No	No	NA	NA
KEL	Yes	Yes	No	No	NA	NA
KIAA0319	Yes	Yes	No	No	NA	NA
KIAA0528	Yes	Yes	No	No	NA	NA
KIAA0754	Yes	Yes	No	No	NA	NA
KIAA0922	Yes	Yes	No	No	NA	NA
KIAA1199	Yes	Yes	No	No	NA	NA
KIAA1524	Yes	Yes	No	No	NA	NA
KIAA1919	Yes	Yes	No	No	NA	NA
KIF18A	Yes	Yes	No	No	NA	NA
KIR2DL1	Yes	Yes	No	No	NA	NA
KIR2DL2	Yes	Yes	No	No	NA	NA
KIR2DL3	Yes	Yes	No	No	NA	NA
KIR2DL4	Yes	Yes	No	No	NA	NA
KIR3DL1	Yes	Yes	No	No	NA	NA
KIRREL	Yes	Yes	Yes	Yes	1	0.00598
KIRREL3	Yes	Yes	No	No	NA	NA
KISS1R	Yes	Yes	No	No	NA	NA
KIT	Yes	Yes	No	No	NA	NA
KITLG	Yes	Yes	No	No	NA	NA
KLB	Yes	Yes	No	No	NA	NA
KLF5	Yes	Yes	No	No	NA	NA
KLRB1	Yes	Yes	No	No	NA	NA
KLRF2	Yes	Yes	No	No	NA	NA
KLRK1	Yes	Yes	No	No	NA	NA
KRAS	Yes	Yes	No	No	NA	NA
KREMEN2	Yes	Yes	No	No	NA	NA
KRIT1	Yes	Yes	Yes	No	NA	NA
KRT4	Yes	Yes	No	No	NA	NA
L1CAM	Yes	Yes	No	No	NA	NA
LAMP1	Yes	Yes	Yes	Yes	2	0.99287
LAMP5	Yes	Yes	No	No	NA	NA
LAMTOR1	Yes	Yes	Yes	No	NA	NA
LANCL2	Yes	Yes	No	No	NA	NA
LAPTM5	Yes	Yes	No	No	NA	NA
LAT	Yes	Yes	No	No	NA	NA
LCE1A	Yes	Yes	No	No	NA	NA
LCE1B	Yes	Yes	No	No	NA	NA
LCE1C	Yes	Yes	No	No	NA	NA
LCE1D	Yes	Yes	No	No	NA	NA
LCE1E	Yes	Yes	No	No	NA	NA
LCE1F	Yes	Yes	No	No	NA	NA
LCE2A	Yes	Yes	No	No	NA	NA
LCE2B	Yes	Yes	No	No	NA	NA
LCE2C	Yes	Yes	No	No	NA	NA
LCE2D	Yes	Yes	No	No	NA	NA
LCE3A	Yes	Yes	No	No	NA	NA
LCE3B	Yes	Yes	No	No	NA	NA
LCE3C	Yes	Yes	No	No	NA	NA
LCE3D	Yes	Yes	No	No	NA	NA
LCE3E	Yes	Yes	No	No	NA	NA
LCE4A	Yes	Yes	No	No	NA	NA
LCE5A	Yes	Yes	No	No	NA	NA
LCK	Yes	Yes	Yes	No	NA	NA
LCP2	Yes	Yes	No	No	NA	NA
LCT	Yes	Yes	No	No	NA	NA
LDLR	Yes	Yes	No	No	NA	NA
LDLRAP1	Yes	Yes	No	No	NA	NA
LELP1	Yes	Yes	No	No	NA	NA
LGALS4	Yes	Yes	No	No	NA	NA
LGR4	Yes	Yes	No	No	NA	NA
LGR5	Yes	Yes	No	No	NA	NA
LHCGR	Yes	Yes	No	No	NA	NA
LIFR	Yes	Yes	Yes	Yes	1	0.58468
LILRB1	Yes	Yes	No	No	NA	NA
LILRB2	Yes	Yes	No	No	NA	NA
LILRB3	Yes	Yes	No	No	NA	NA
LIMA1	Yes	Yes	No	No	NA	NA
LIMS1	Yes	Yes	No	No	NA	NA
LIN7B	Yes	Yes	No	No	NA	NA
LIN7C	Yes	Yes	Yes	No	NA	NA
LINGO1	Yes	Yes	No	No	NA	NA
LIPE	Yes	Yes	No	No	NA	NA
LIPG	Yes	Yes	No	No	NA	NA
LIPH	Yes	Yes	Yes	No	NA	NA
LIPI	Yes	Yes	Yes	No	NA	NA
LMAN2	Yes	Yes	Yes	Yes	1	0.09753
LMBR1L	Yes	Yes	No	No	NA	NA
LOR	Yes	Yes	No	No	NA	NA
LPAR1	Yes	Yes	No	No	NA	NA
LPAR2	Yes	Yes	No	No	NA	NA
LPAR3	Yes	Yes	No	No	NA	NA
LPAR4	Yes	Yes	No	No	NA	NA
LPAR5	Yes	Yes	No	No	NA	NA
LPAR6	Yes	Yes	No	No	NA	NA
LPHN1	Yes	Yes	No	No	NA	NA
LPHN3	Yes	Yes	No	No	NA	NA
LPO	Yes	Yes	Yes	No	NA	NA
LPP	Yes	Yes	No	No	NA	NA
LPPR3	Yes	Yes	No	No	NA	NA
LPXN	Yes	Yes	No	No	NA	NA
LRFN1	Yes	Yes	No	No	NA	NA
LRFN2	Yes	Yes	No	No	NA	NA
LRFN3	Yes	Yes	No	No	NA	NA
LRIG2	Yes	Yes	No	No	NA	NA
LRP1	Yes	Yes	No	No	NA	NA
LRP11	Yes	Yes	No	No	NA	NA
LRP12	Yes	Yes	No	No	NA	NA
LRP4	Yes	Yes	No	No	NA	NA
LRP5	Yes	Yes	No	No	NA	NA
LRP5L	Yes	Yes	No	No	NA	NA
LRPAP1	Yes	Yes	No	No	NA	NA
LRRC26	Yes	Yes	Yes	Yes	1	0.24774
LRRC38	Yes	Yes	No	No	NA	NA
LRRC4	Yes	Yes	No	No	NA	NA
LRRC4B	Yes	Yes	No	No	NA	NA
LRRC52	Yes	Yes	No	No	NA	NA
LRRC55	Yes	Yes	No	No	NA	NA
LRRC7	Yes	Yes	No	No	NA	NA
LRRC8A	Yes	Yes	No	No	NA	NA
LRRC8B	Yes	Yes	No	No	NA	NA
LRRC8E	Yes	Yes	No	No	NA	NA
LRRTM2	Yes	Yes	No	No	NA	NA
LRRTM3	Yes	Yes	No	No	NA	NA
LRRTM4	Yes	Yes	No	No	NA	NA
LSAMP	Yes	Yes	No	No	NA	NA
LSP1	Yes	Yes	Yes	No	NA	NA
LTB	Yes	Yes	No	No	NA	NA
LTB4R	Yes	Yes	No	No	NA	NA
LTB4R2	Yes	Yes	No	No	NA	NA
LTF	Yes	Yes	Yes	No	1	0.93717
LY6D	Yes	Yes	No	No	NA	NA
LY6E	Yes	Yes	No	No	NA	NA
LY6G6D	Yes	Yes	No	No	NA	NA
LY6H	Yes	Yes	No	No	NA	NA
LY6K	Yes	Yes	No	No	NA	NA
LY9	Yes	Yes	No	No	NA	NA
LY96	Yes	Yes	No	No	NA	NA
LYN	Yes	Yes	Yes	No	NA	NA
LYPD1	Yes	Yes	No	No	NA	NA
LYPD3	Yes	Yes	Yes	Yes	NA	NA
LYPD4	Yes	Yes	No	No	NA	NA
LYPD5	Yes	Yes	No	No	NA	NA
LYPD6B	Yes	Yes	No	No	NA	NA
LZTS1	Yes	Yes	No	No	NA	NA
MACF1	Yes	Yes	No	No	NA	NA
MAEA	Yes	Yes	No	No	NA	NA
MAGEE1	Yes	Yes	No	No	NA	NA
MAGI2	Yes	Yes	No	No	NA	NA
MAGT1	Yes	Yes	No	No	NA	NA
MAL	Yes	Yes	No	No	NA	NA
MALL	Yes	Yes	No	No	NA	NA
MAP1B	Yes	Yes	No	No	NA	NA
MAP2	Yes	Yes	No	No	NA	NA
MAP2K2	Yes	Yes	No	No	NA	NA
MAP3K12	Yes	Yes	No	No	NA	NA
MAP7	Yes	Yes	No	No	NA	NA
MAPK1	Yes	Yes	Yes	No	NA	NA
MAPK10	Yes	Yes	No	No	NA	NA
MAPK3	Yes	Yes	Yes	No	NA	NA
MAPKAP1	Yes	Yes	No	No	NA	NA
MAPT	Yes	Yes	No	No	NA	NA
2016-03-01	Yes	Yes	No	No	NA	NA
MARCO	Yes	Yes	No	No	NA	NA
MARK1	Yes	Yes	No	No	NA	NA
MARK2	Yes	Yes	No	No	NA	NA
MARK3	Yes	Yes	Yes	No	NA	NA
MARVELD1	Yes	Yes	No	No	NA	NA
MARVELD2	Yes	Yes	No	No	NA	NA
MAS1	Yes	Yes	No	No	NA	NA
MAST1	Yes	Yes	No	No	NA	NA
MASTL	Yes	Yes	No	No	NA	NA
MBD3L1	Yes	Yes	No	No	NA	NA
MBL2	Yes	Yes	Yes	No	NA	NA
MC1R	Yes	Yes	No	No	NA	NA
MC2R	Yes	Yes	No	No	NA	NA
MC3R	Yes	Yes	No	No	NA	NA
MC4R	Yes	Yes	No	No	NA	NA
MC5R	Yes	Yes	No	No	NA	NA
MCAM	Yes	Yes	No	No	NA	NA
MCC	Yes	Yes	No	No	NA	NA
MCHR1	Yes	Yes	No	No	NA	NA
MCHR2	Yes	Yes	No	No	NA	NA
MCOLN1	Yes	Yes	No	No	NA	NA
MCOLN2	Yes	Yes	No	No	NA	NA
MCOLN3	Yes	Yes	No	No	NA	NA
MCTS1	Yes	Yes	No	No	NA	NA
MDGA1	Yes	Yes	Yes	No	NA	NA
MDGA2	Yes	Yes	No	No	NA	NA
MEGF10	Yes	Yes	No	No	NA	NA
MEGF11	Yes	Yes	No	No	NA	NA
MELK	Yes	Yes	No	No	NA	NA
MEN1	Yes	Yes	No	No	NA	NA
MEP1B	Yes	Yes	Yes	Yes	1	0.12389
MET	Yes	Yes	No	No	NA	NA
METAP2	Yes	Yes	No	No	NA	NA
METTL22	Yes	Yes	No	No	NA	NA
MFAP3L	Yes	Yes	No	No	NA	NA
MFI2	Yes	Yes	Yes	No	NA	NA
MFSD2A	Yes	Yes	No	No	NA	NA
MGAM	Yes	Yes	Yes	Yes	1	0.99993
MGLL	Yes	Yes	No	No	NA	NA
MGRN1	Yes	Yes	Yes	No	NA	NA
MGST2	Yes	Yes	No	No	NA	NA
MICALL2	Yes	Yes	No	No	NA	NA
MICB	Yes	Yes	No	No	NA	NA
MIEN1	Yes	Yes	Yes	No	NA	NA
MIP	Yes	Yes	No	No	NA	NA
MLC1	Yes	Yes	No	No	NA	NA
MLKL	Yes	Yes	No	No	NA	NA
MLNR	Yes	Yes	No	No	NA	NA
MMD	Yes	Yes	No	No	NA	NA
MME	Yes	Yes	Yes	Yes	1	0.99942
MMP14	Yes	Yes	No	No	NA	NA
MMP15	Yes	Yes	No	No	NA	NA
MMP16	Yes	Yes	Yes	Yes	1	0.17848
MMP17	Yes	Yes	Yes	No	NA	NA
MMP25	Yes	Yes	Yes	No	NA	NA
MOG	Yes	Yes	No	No	NA	NA
MPDZ	Yes	Yes	No	No	NA	NA
MPL	Yes	Yes	No	No	NA	NA
MPP2	Yes	Yes	No	No	NA	NA
MPP3	Yes	Yes	No	No	NA	NA
MPP5	Yes	Yes	Yes	No	NA	NA
MPZ	Yes	Yes	No	No	NA	NA
MPZL1	Yes	Yes	No	No	NA	NA
MR1	Yes	Yes	No	No	NA	NA
MRAP	Yes	Yes	No	No	NA	NA
MRAP2	Yes	Yes	No	No	NA	NA
MRC1	Yes	Yes	No	No	NA	NA
MREG	Yes	Yes	No	No	NA	NA
MRGPRE	Yes	Yes	No	No	NA	NA
MRGPRF	Yes	Yes	Yes	Yes	6	0.05036
MRGPRG	Yes	Yes	No	No	NA	NA
MRGPRX1	Yes	Yes	No	No	NA	NA
MRGPRX3	Yes	Yes	No	No	NA	NA
MRGPRX4	Yes	Yes	No	No	NA	NA
MS4A1	Yes	Yes	Yes	Yes	4	0.98955
MS4A2	Yes	Yes	No	No	NA	NA
MSLN	Yes	Yes	No	No	NA	NA
MSLNL	Yes	Yes	No	No	NA	NA
MSMO1	Yes	Yes	No	No	NA	NA
MSN	Yes	Yes	Yes	No	NA	NA
MST1R	Yes	Yes	No	No	NA	NA
MTFR1	Yes	Yes	No	No	NA	NA
MTM1	Yes	Yes	Yes	No	NA	NA
MTMR1	Yes	Yes	No	No	NA	NA
MTNR1A	Yes	Yes	No	No	NA	NA
MTNR1B	Yes	Yes	No	No	NA	NA
MUC1	Yes	Yes	Yes	Yes	2	0.95202
MUC12	Yes	Yes	No	No	NA	NA
MUC13	Yes	Yes	Yes	Yes	1	0.00178
MUC16	Yes	Yes	Yes	Yes	1	0.02957
MUC17	Yes	Yes	No	No	NA	NA
MUC20	Yes	Yes	No	No	NA	NA
MUC4	Yes	Yes	Yes	Yes	2	0.85571
MYADM	Yes	Yes	Yes	Yes	7	0.96258
MYD88	Yes	Yes	No	No	NA	NA
MYH10	Yes	Yes	Yes	No	NA	NA
MYH9	Yes	Yes	Yes	No	NA	NA
MYLK	Yes	Yes	Yes	No	NA	NA
MYO10	Yes	Yes	No	No	NA	NA
MYO1A	Yes	Yes	No	No	NA	NA
MYO1C	Yes	Yes	Yes	No	NA	NA
MYO1G	Yes	Yes	Yes	No	NA	NA
MYO6	Yes	Yes	Yes	No	NA	NA
MYOF	Yes	Yes	Yes	Yes	1	8e-05
MYZAP	Yes	Yes	No	No	NA	NA
NAALADL1	Yes	Yes	No	No	NA	NA
NALCN	Yes	Yes	No	No	NA	NA
NBEA	Yes	Yes	No	No	NA	NA
NCAM1	Yes	Yes	Yes	Yes	1	0.55612
NCAM2	Yes	Yes	No	No	NA	NA
NCF4	Yes	Yes	No	No	NA	NA
NCKAP1L	Yes	Yes	Yes	Yes	NA	NA
NCMAP	Yes	Yes	No	No	NA	NA
NCR2	Yes	Yes	No	No	NA	NA
NCR3LG1	Yes	Yes	No	No	NA	NA
NCS1	Yes	Yes	Yes	No	NA	NA
NDE1	Yes	Yes	No	No	NA	NA
NDP	Yes	Yes	Yes	No	NA	NA
NDRG1	Yes	Yes	Yes	No	1	0.90897
NECAP1	Yes	Yes	No	No	NA	NA
NEDD4	Yes	Yes	Yes	No	NA	NA
NEO1	Yes	Yes	No	No	NA	NA
NEU3	Yes	Yes	No	No	NA	NA
NEURL	Yes	Yes	No	No	NA	NA
NF2	Yes	Yes	No	No	NA	NA
NFASC	Yes	Yes	Yes	Yes	1	0.69788
NHS	Yes	Yes	No	No	NA	NA
NIPA1	Yes	Yes	No	No	NA	NA
NIPA2	Yes	Yes	No	No	NA	NA
NISCH	Yes	Yes	No	No	NA	NA
NKAIN1	Yes	Yes	No	No	NA	NA
NKAIN2	Yes	Yes	No	No	NA	NA
NKAIN3	Yes	Yes	No	No	NA	NA
NKAIN4	Yes	Yes	No	No	NA	NA
NKD1	Yes	Yes	No	No	NA	NA
NKD2	Yes	Yes	No	No	NA	NA
NKG7	Yes	Yes	No	No	NA	NA
NLGN1	Yes	Yes	No	No	NA	NA
NLGN2	Yes	Yes	No	No	NA	NA
NLGN3	Yes	Yes	No	No	NA	NA
NLGN4X	Yes	Yes	No	No	NA	NA
NLGN4Y	Yes	Yes	No	No	NA	NA
NLRP10	Yes	Yes	No	No	NA	NA
NLRP6	Yes	Yes	No	No	NA	NA
NMBR	Yes	Yes	No	No	NA	NA
NME1	Yes	Yes	Yes	No	NA	NA
NMUR1	Yes	Yes	No	No	NA	NA
NMUR2	Yes	Yes	No	No	NA	NA
NOD1	Yes	Yes	No	No	NA	NA
NOD2	Yes	Yes	No	No	NA	NA
NOS1	Yes	Yes	No	No	NA	NA
NOS3	Yes	Yes	No	No	NA	NA
NOSTRIN	Yes	Yes	No	No	NA	NA
NOTCH3	Yes	Yes	No	No	NA	NA
NOTCH4	Yes	Yes	No	No	NA	NA
NOX1	Yes	Yes	No	No	NA	NA
NOXA1	Yes	Yes	No	No	NA	NA
NOXO1	Yes	Yes	No	No	NA	NA
NPBWR1	Yes	Yes	No	No	NA	NA
NPBWR2	Yes	Yes	No	No	NA	NA
NPC1	Yes	Yes	Yes	Yes	1	0.97701
NPFFR1	Yes	Yes	No	No	NA	NA
NPFFR2	Yes	Yes	No	No	NA	NA
NPHS1	Yes	Yes	Yes	Yes	1	0.20545
NPHS2	Yes	Yes	Yes	Yes	1	0.91389
NPR2	Yes	Yes	No	No	NA	NA
NPSR1	Yes	Yes	No	No	NA	NA
NPTN	Yes	Yes	No	No	NA	NA
NPY1R	Yes	Yes	No	No	NA	NA
NPY2R	Yes	Yes	No	No	NA	NA
NPY5R	Yes	Yes	No	No	NA	NA
NRCAM	Yes	Yes	No	No	NA	NA
NRD1	Yes	Yes	No	No	NA	NA
NRG1	Yes	Yes	No	No	NA	NA
NRG3	Yes	Yes	No	No	NA	NA
NRN1	Yes	Yes	No	No	NA	NA
NRP1	Yes	Yes	Yes	Yes	1	0.24442
NRSN2	Yes	Yes	No	No	NA	NA
NRXN1	Yes	Yes	No	No	NA	NA
NRXN3	Yes	Yes	No	No	NA	NA
NSF	Yes	Yes	Yes	No	NA	NA
NSFL1C	Yes	Yes	No	No	NA	NA
NT5E	Yes	Yes	Yes	Yes	2	0.82014
NTM	Yes	Yes	No	No	NA	NA
NTN4	Yes	Yes	No	No	NA	NA
NTNG1	Yes	Yes	No	No	NA	NA
NTNG2	Yes	Yes	No	No	NA	NA
NTRK1	Yes	Yes	No	No	NA	NA
NTRK2	Yes	Yes	No	No	NA	NA
NTSR2	Yes	Yes	No	No	NA	NA
NUP35	Yes	Yes	No	No	NA	NA
O3FAR1	Yes	Yes	No	No	NA	NA
OCRL	Yes	Yes	Yes	No	NA	NA
OGT	Yes	Yes	No	No	NA	NA
OLFM4	Yes	Yes	Yes	No	NA	NA
OLR1	Yes	Yes	Yes	Yes	1	0.85033
OMG	Yes	Yes	No	No	NA	NA
OPALIN	Yes	Yes	No	No	NA	NA
OPN1MW2	Yes	Yes	No	No	NA	NA
OPRD1	Yes	Yes	No	No	NA	NA
OPRL1	Yes	Yes	No	No	NA	NA
OPRM1	Yes	Yes	No	No	NA	NA
OR10A2	Yes	Yes	No	No	NA	NA
OR10A3	Yes	Yes	No	No	NA	NA
OR10A4	Yes	Yes	No	No	NA	NA
OR10A5	Yes	Yes	No	No	NA	NA
OR10A6	Yes	Yes	No	No	NA	NA
OR10A7	Yes	Yes	No	No	NA	NA
OR10AD1	Yes	Yes	No	No	NA	NA
OR10AG1	Yes	Yes	No	No	NA	NA
OR10C1	Yes	Yes	No	No	NA	NA
OR10D3	Yes	Yes	No	No	NA	NA
OR10G2	Yes	Yes	No	No	NA	NA
OR10G3	Yes	Yes	No	No	NA	NA
OR10G4	Yes	Yes	No	No	NA	NA
OR10G7	Yes	Yes	No	No	NA	NA
OR10G8	Yes	Yes	No	No	NA	NA
OR10G9	Yes	Yes	No	No	NA	NA
OR10H1	Yes	Yes	No	No	NA	NA
OR10H2	Yes	Yes	No	No	NA	NA
OR10H3	Yes	Yes	No	No	NA	NA
OR10H4	Yes	Yes	No	No	NA	NA
OR10H5	Yes	Yes	No	No	NA	NA
OR10J1	Yes	Yes	No	No	NA	NA
OR10J3	Yes	Yes	No	No	NA	NA
OR10J5	Yes	Yes	No	No	NA	NA
OR10K1	Yes	Yes	No	No	NA	NA
OR10K2	Yes	Yes	No	No	NA	NA
OR10P1	Yes	Yes	No	No	NA	NA
OR10Q1	Yes	Yes	No	No	NA	NA
OR10R2	Yes	Yes	No	No	NA	NA
OR10S1	Yes	Yes	No	No	NA	NA
OR10T2	Yes	Yes	No	No	NA	NA
OR10V1	Yes	Yes	No	No	NA	NA
OR10W1	Yes	Yes	No	No	NA	NA
OR10X1	Yes	Yes	No	No	NA	NA
OR10Z1	Yes	Yes	No	No	NA	NA
OR11G2	Yes	Yes	No	No	NA	NA
OR11H1	Yes	Yes	No	No	NA	NA
OR11H12	Yes	Yes	No	No	NA	NA
OR11H4	Yes	Yes	No	No	NA	NA
OR11H6	Yes	Yes	No	No	NA	NA
OR11L1	Yes	Yes	Yes	Yes	7	0.04461
OR12D2	Yes	Yes	No	No	NA	NA
OR13A1	Yes	Yes	No	No	NA	NA
OR13C2	Yes	Yes	No	No	NA	NA
OR13C3	Yes	Yes	No	No	NA	NA
OR13C4	Yes	Yes	No	No	NA	NA
OR13C5	Yes	Yes	No	No	NA	NA
OR13C8	Yes	Yes	No	No	NA	NA
OR13C9	Yes	Yes	No	No	NA	NA
OR13D1	Yes	Yes	No	No	NA	NA
OR13F1	Yes	Yes	No	No	NA	NA
OR13G1	Yes	Yes	No	No	NA	NA
OR13H1	Yes	Yes	No	No	NA	NA
OR13J1	Yes	Yes	No	No	NA	NA
OR14A16	Yes	Yes	No	No	NA	NA
OR14A2	Yes	Yes	No	No	NA	NA
OR14C36	Yes	Yes	No	No	NA	NA
OR14I1	Yes	Yes	No	No	NA	NA
OR14K1	Yes	Yes	No	No	NA	NA
OR1A1	Yes	Yes	No	No	NA	NA
OR1A2	Yes	Yes	No	No	NA	NA
OR1B1	Yes	Yes	No	No	NA	NA
OR1C1	Yes	Yes	No	No	NA	NA
OR1D2	Yes	Yes	No	No	NA	NA
OR1D5	Yes	Yes	No	No	NA	NA
OR1E1	Yes	Yes	No	No	NA	NA
OR1E2	Yes	Yes	No	No	NA	NA
OR1F1	Yes	Yes	No	No	NA	NA
OR1G1	Yes	Yes	No	No	NA	NA
OR1I1	Yes	Yes	No	No	NA	NA
OR1J1	Yes	Yes	No	No	NA	NA
OR1J2	Yes	Yes	No	No	NA	NA
OR1J4	Yes	Yes	No	No	NA	NA
OR1K1	Yes	Yes	No	No	NA	NA
OR1L1	Yes	Yes	No	No	NA	NA
OR1L3	Yes	Yes	No	No	NA	NA
OR1L4	Yes	Yes	No	No	NA	NA
OR1L6	Yes	Yes	No	No	NA	NA
OR1L8	Yes	Yes	No	No	NA	NA
OR1M1	Yes	Yes	No	No	NA	NA
OR1N1	Yes	Yes	No	No	NA	NA
OR1N2	Yes	Yes	No	No	NA	NA
OR1Q1	Yes	Yes	No	No	NA	NA
OR1S1	Yes	Yes	No	No	NA	NA
OR1S2	Yes	Yes	No	No	NA	NA
OR2A1	Yes	Yes	No	No	NA	NA
OR2A12	Yes	Yes	No	No	NA	NA
OR2A14	Yes	Yes	No	No	NA	NA
OR2A2	Yes	Yes	No	No	NA	NA
OR2A25	Yes	Yes	No	No	NA	NA
OR2A4	Yes	Yes	No	No	NA	NA
OR2A42	Yes	Yes	No	No	NA	NA
OR2A5	Yes	Yes	No	No	NA	NA
OR2A7	Yes	Yes	No	No	NA	NA
OR2AE1	Yes	Yes	No	No	NA	NA
OR2AG1	Yes	Yes	No	No	NA	NA
OR2AG2	Yes	Yes	No	No	NA	NA
OR2AJ1	Yes	Yes	No	No	NA	NA
OR2AK2	Yes	Yes	No	No	NA	NA
OR2AP1	Yes	Yes	No	No	NA	NA
OR2AT4	Yes	Yes	No	No	NA	NA
OR2B11	Yes	Yes	No	No	NA	NA
OR2B2	Yes	Yes	No	No	NA	NA
OR2B6	Yes	Yes	No	No	NA	NA
OR2C1	Yes	Yes	No	No	NA	NA
OR2C3	Yes	Yes	No	No	NA	NA
OR2D2	Yes	Yes	No	No	NA	NA
OR2D3	Yes	Yes	No	No	NA	NA
OR2F1	Yes	Yes	No	No	NA	NA
OR2F2	Yes	Yes	No	No	NA	NA
OR2G2	Yes	Yes	No	No	NA	NA
OR2G3	Yes	Yes	No	No	NA	NA
OR2G6	Yes	Yes	No	No	NA	NA
OR2J1	Yes	Yes	No	No	NA	NA
OR2K2	Yes	Yes	No	No	NA	NA
OR2L13	Yes	Yes	No	No	NA	NA
OR2L2	Yes	Yes	No	No	NA	NA
OR2L3	Yes	Yes	No	No	NA	NA
OR2L5	Yes	Yes	No	No	NA	NA
OR2L8	Yes	Yes	No	No	NA	NA
OR2M2	Yes	Yes	No	No	NA	NA
OR2M3	Yes	Yes	No	No	NA	NA
OR2M4	Yes	Yes	No	No	NA	NA
OR2M5	Yes	Yes	No	No	NA	NA
OR2M7	Yes	Yes	No	No	NA	NA
OR2S2	Yes	Yes	No	No	NA	NA
OR2T1	Yes	Yes	No	No	NA	NA
OR2T10	Yes	Yes	No	No	NA	NA
OR2T11	Yes	Yes	No	No	NA	NA
OR2T12	Yes	Yes	No	No	NA	NA
OR2T2	Yes	Yes	No	No	NA	NA
OR2T27	Yes	Yes	No	No	NA	NA
OR2T29	Yes	Yes	No	No	NA	NA
OR2T3	Yes	Yes	No	No	NA	NA
OR2T33	Yes	Yes	No	No	NA	NA
OR2T34	Yes	Yes	No	No	NA	NA
OR2T35	Yes	Yes	No	No	NA	NA
OR2T4	Yes	Yes	No	No	NA	NA
OR2T5	Yes	Yes	No	No	NA	NA
OR2T6	Yes	Yes	No	No	NA	NA
OR2T8	Yes	Yes	No	No	NA	NA
OR2V1	Yes	Yes	No	No	NA	NA
OR2V2	Yes	Yes	No	No	NA	NA
OR2W3	Yes	Yes	No	No	NA	NA
OR2Y1	Yes	Yes	No	No	NA	NA
OR2Z1	Yes	Yes	No	No	NA	NA
OR3A1	Yes	Yes	No	No	NA	NA
OR3A2	Yes	Yes	No	No	NA	NA
OR3A3	Yes	Yes	No	No	NA	NA
OR4A15	Yes	Yes	No	No	NA	NA
OR4A16	Yes	Yes	No	No	NA	NA
OR4A47	Yes	Yes	No	No	NA	NA
OR4A5	Yes	Yes	No	No	NA	NA
OR4B1	Yes	Yes	No	No	NA	NA
OR4C11	Yes	Yes	No	No	NA	NA
OR4C12	Yes	Yes	No	No	NA	NA
OR4C13	Yes	Yes	No	No	NA	NA
OR4C15	Yes	Yes	No	No	NA	NA
OR4C16	Yes	Yes	No	No	NA	NA
OR4C3	Yes	Yes	No	No	NA	NA
OR4C46	Yes	Yes	No	No	NA	NA
OR4C5	Yes	Yes	No	No	NA	NA
OR4C6	Yes	Yes	No	No	NA	NA
OR4D1	Yes	Yes	No	No	NA	NA
OR4D10	Yes	Yes	No	No	NA	NA
OR4D11	Yes	Yes	No	No	NA	NA
OR4D2	Yes	Yes	No	No	NA	NA
OR4D5	Yes	Yes	No	No	NA	NA
OR4D6	Yes	Yes	No	No	NA	NA
OR4D9	Yes	Yes	No	No	NA	NA
OR4E2	Yes	Yes	No	No	NA	NA
OR4F15	Yes	Yes	No	No	NA	NA
OR4F16	Yes	Yes	No	No	NA	NA
OR4F17	Yes	Yes	No	No	NA	NA
OR4F21	Yes	Yes	No	No	NA	NA
OR4F29	Yes	Yes	No	No	NA	NA
OR4F3	Yes	Yes	No	No	NA	NA
OR4F4	Yes	Yes	No	No	NA	NA
OR4F5	Yes	Yes	No	No	NA	NA
OR4F6	Yes	Yes	No	No	NA	NA
OR4K1	Yes	Yes	No	No	NA	NA
OR4K13	Yes	Yes	No	No	NA	NA
OR4K14	Yes	Yes	No	No	NA	NA
OR4K15	Yes	Yes	No	No	NA	NA
OR4K17	Yes	Yes	No	No	NA	NA
OR4K2	Yes	Yes	No	No	NA	NA
OR4K5	Yes	Yes	No	No	NA	NA
OR4L1	Yes	Yes	No	No	NA	NA
OR4M1	Yes	Yes	No	No	NA	NA
OR4M2	Yes	Yes	No	No	NA	NA
OR4N2	Yes	Yes	No	No	NA	NA
OR4N4	Yes	Yes	No	No	NA	NA
OR4N5	Yes	Yes	No	No	NA	NA
OR4P4	Yes	Yes	No	No	NA	NA
OR4Q3	Yes	Yes	No	No	NA	NA
OR4S1	Yes	Yes	No	No	NA	NA
OR4S2	Yes	Yes	No	No	NA	NA
OR4X1	Yes	Yes	No	No	NA	NA
OR4X2	Yes	Yes	No	No	NA	NA
OR51A2	Yes	Yes	No	No	NA	NA
OR51A4	Yes	Yes	No	No	NA	NA
OR51A7	Yes	Yes	No	No	NA	NA
OR51B2	Yes	Yes	No	No	NA	NA
OR51B4	Yes	Yes	No	No	NA	NA
OR51B5	Yes	Yes	No	No	NA	NA
OR51B6	Yes	Yes	No	No	NA	NA
OR51D1	Yes	Yes	No	No	NA	NA
OR51E1	Yes	Yes	No	No	NA	NA
OR51E2	Yes	Yes	No	No	NA	NA
OR51F1	Yes	Yes	No	No	NA	NA
OR51F2	Yes	Yes	No	No	NA	NA
OR51G1	Yes	Yes	No	No	NA	NA
OR51G2	Yes	Yes	No	No	NA	NA
OR51H1P	Yes	Yes	No	No	NA	NA
OR51I1	Yes	Yes	No	No	NA	NA
OR51I2	Yes	Yes	No	No	NA	NA
OR51J1	Yes	Yes	No	No	NA	NA
OR51L1	Yes	Yes	No	No	NA	NA
OR51M1	Yes	Yes	No	No	NA	NA
OR51Q1	Yes	Yes	No	No	NA	NA
OR51S1	Yes	Yes	No	No	NA	NA
OR51T1	Yes	Yes	No	No	NA	NA
OR51V1	Yes	Yes	No	No	NA	NA
OR52A1	Yes	Yes	No	No	NA	NA
OR52A5	Yes	Yes	No	No	NA	NA
OR52B2	Yes	Yes	No	No	NA	NA
OR52B4	Yes	Yes	No	No	NA	NA
OR52B6	Yes	Yes	No	No	NA	NA
OR52D1	Yes	Yes	No	No	NA	NA
OR52E2	Yes	Yes	No	No	NA	NA
OR52E4	Yes	Yes	No	No	NA	NA
OR52E6	Yes	Yes	No	No	NA	NA
OR52E8	Yes	Yes	No	No	NA	NA
OR52H1	Yes	Yes	No	No	NA	NA
OR52I1	Yes	Yes	No	No	NA	NA
OR52I2	Yes	Yes	No	No	NA	NA
OR52J3	Yes	Yes	No	No	NA	NA
OR52K1	Yes	Yes	No	No	NA	NA
OR52K2	Yes	Yes	No	No	NA	NA
OR52L1	Yes	Yes	No	No	NA	NA
OR52M1	Yes	Yes	No	No	NA	NA
OR52N1	Yes	Yes	No	No	NA	NA
OR52N2	Yes	Yes	No	No	NA	NA
OR52N4	Yes	Yes	No	No	NA	NA
OR52N5	Yes	Yes	No	No	NA	NA
OR52R1	Yes	Yes	No	No	NA	NA
OR52W1	Yes	Yes	No	No	NA	NA
OR56A1	Yes	Yes	No	No	NA	NA
OR56A3	Yes	Yes	No	No	NA	NA
OR56A4	Yes	Yes	No	No	NA	NA
OR56B1	Yes	Yes	No	No	NA	NA
OR56B4	Yes	Yes	No	No	NA	NA
OR5A1	Yes	Yes	No	No	NA	NA
OR5A2	Yes	Yes	No	No	NA	NA
OR5AC2	Yes	Yes	No	No	NA	NA
OR5AK2	Yes	Yes	No	No	NA	NA
OR5AN1	Yes	Yes	No	No	NA	NA
OR5AP2	Yes	Yes	No	No	NA	NA
OR5AR1	Yes	Yes	No	No	NA	NA
OR5AS1	Yes	Yes	No	No	NA	NA
OR5AU1	Yes	Yes	No	No	NA	NA
OR5B12	Yes	Yes	No	No	NA	NA
OR5B17	Yes	Yes	No	No	NA	NA
OR5B2	Yes	Yes	No	No	NA	NA
OR5B21	Yes	Yes	No	No	NA	NA
OR5B3	Yes	Yes	No	No	NA	NA
OR5C1	Yes	Yes	No	No	NA	NA
OR5D13	Yes	Yes	No	No	NA	NA
OR5D14	Yes	Yes	No	No	NA	NA
OR5D16	Yes	Yes	No	No	NA	NA
OR5D18	Yes	Yes	No	No	NA	NA
OR5F1	Yes	Yes	No	No	NA	NA
OR5H1	Yes	Yes	No	No	NA	NA
OR5H14	Yes	Yes	No	No	NA	NA
OR5H15	Yes	Yes	No	No	NA	NA
OR5H2	Yes	Yes	No	No	NA	NA
OR5H6	Yes	Yes	No	No	NA	NA
OR5I1	Yes	Yes	No	No	NA	NA
OR5J2	Yes	Yes	No	No	NA	NA
OR5K1	Yes	Yes	No	No	NA	NA
OR5K2	Yes	Yes	No	No	NA	NA
OR5K3	Yes	Yes	No	No	NA	NA
OR5K4	Yes	Yes	No	No	NA	NA
OR5L1	Yes	Yes	No	No	NA	NA
OR5L2	Yes	Yes	No	No	NA	NA
OR5M1	Yes	Yes	No	No	NA	NA
OR5M10	Yes	Yes	No	No	NA	NA
OR5M11	Yes	Yes	No	No	NA	NA
OR5M3	Yes	Yes	No	No	NA	NA
OR5M8	Yes	Yes	No	No	NA	NA
OR5M9	Yes	Yes	No	No	NA	NA
OR5P2	Yes	Yes	No	No	NA	NA
OR5P3	Yes	Yes	No	No	NA	NA
OR5R1	Yes	Yes	No	No	NA	NA
OR5W2	Yes	Yes	No	No	NA	NA
OR6A2	Yes	Yes	No	No	NA	NA
OR6B1	Yes	Yes	No	No	NA	NA
OR6B2	Yes	Yes	No	No	NA	NA
[truncated: 1,048 more rows]
